# Supplementary material for: RoCK and ROI: single-cell transcriptomics with multiplexed enrichment of selected transcripts and region-specific sequencing
Source: Springer Nature journal article supplement (doi:10.1038/s41467-025-66248-z), 2025-12-10
Supplement: MOESM1 [file 41467_2025_66248_MOESM1_ESM.pdf › 25985suppl/41467_2025_66248_MOESM1_ESM.pdf]

# Supplementary Information

## RoCK and ROI: Single-cell transcriptomics with multiplexed enrichment of selected transcripts and region-specific sequencing

Giulia Moro<sup>1,\*</sup>, Izaskun Mallona<sup>1,2,\*</sup>, Malwine J. Barz<sup>3,4</sup>, Joël Maillard<sup>1</sup>, Michael David Brügger<sup>1</sup>, Hassan Fazilaty<sup>1</sup>, Quentin Szabo<sup>1</sup>, Tomas Valenta<sup>1,5</sup>, Kristina Handler<sup>6</sup>, Fiona Kerlin<sup>7,8</sup>, Lorenz Bastian<sup>3,4</sup>, Claudia D. Baldus<sup>3,4</sup>, Andreas E. Moor<sup>9</sup>, Robert Zinzen<sup>10</sup>, Mark D. Robinson<sup>1,2</sup>, Erich Brunner<sup>1</sup> & Konrad Basler<sup>1</sup>

1. Department of Molecular Life Sciences, University of Zurich, Zurich, Switzerland
2. SIB Swiss Institute of Bioinformatics, University of Zurich, Zurich, Switzerland
3. Medical Department II, Hematology and Oncology, University Hospital Schleswig-Holstein, Kiel, Germany
4. Clinical Research Unit "CATCH ALL" (KFO 5010/1), Kiel, Germany
5. Laboratory of Cell and Developmental Biology, Institute of Molecular Genetics of the Czech Academy of Sciences, Prague, Czech Republic
6. Institute of Experimental Immunology, University of Zurich, Zurich, Switzerland
7. Berlin Institute for Medical Systems Biology (BIMSB), Max Delbrück Center for Molecular Medicine (MDC) in the Helmholtz Association, Berlin, Germany
8. Institute of Biology, Department of Biology, Chemistry, Pharmacy, Free University Berlin, Berlin, Germany
9. Department of Biosystems Science and Engineering, ETH Zürich, Basel, Switzerland
10. Systems Biology Imaging Technology Platform, Berlin Institute for Medical Systems Biology (BIMSB), Max Delbrück Center for Molecular Medicine (MDC) in the Helmholtz Association, Berlin, Germany

\*

Equal contribution,  Correspondence (erich.brunner@mls.uzh.ch, izaskun.mallona@gmail.com)

### This file contains the following information:

Supplementary Note 1: Additional text on scRNA-seq experiment performed on HeLa cells (exploring detection limits)

Supplementary Figures 1-21

Supplementary Tables 1-11

## Supplementary Note 1: Experiment performed on HeLa cells

To assess our method's lower detection limit, we targeted a set of transcripts expressed at less than one mRNA per cell on average, and only in a subset of cells. To determine which transcripts to target, we used a previously published bDNA sm-FISH dataset<sup>1</sup> which quantified transcript levels per cell on two replicates of HeLa cells, targeting 928 genes involved in various cellular functions, with probes against absent bacterial transcripts serving as negative controls.

To choose a set of lowly expressed genes for RoCK and ROI targeting, we first performed an unmodified BD Rhapsody experiment (Supp Figure 9a, Supp Figure 10a-c). The scRNA-seq run was performed on the same HeLa cells as Battich et al., 2013<sup>1</sup>, which we used after six passages. We sequenced our library with a higher read depth than the previous experiments (over a billion reads). Since Battich et al., 2013 provide a detailed comparison of bDNA sm-FISH and bulk RNA-seq, we focused on comparing our results to theirs. We analyzed 857 genes consistently detected above bacterial background in both replicates. As expected, the BD Rhapsody results showed lower sensitivity than bDNA sm-FISH even at a high read depth (Supp Figure 9b-d). Nonetheless, using unmodified beads, the standard workflow detected extremely lowly expressed genes (e.g., *HOXA1* at 0.0428 transcripts per cell in <3% of cells; Supp Figure 11a-b), indicating detectability is not solely determined by expression level.

By comparing the Battich et al., 2013 results and our unmodified BD Rhapsody run, we selected seven genes to target with RoCK and ROI: *RAB4B*, *FOXP3*, *KRT23*, *SCN9A*, *ADRA1D*, *EHD3*, and *SOX9*. Their mRNA levels were reported to range from 0.43 to 3.17 spots (transcripts) per cell (bDNA sm-FISH) on average (Supp Figure 9e-g). *RAB4B* and *FOXP3* were detected in our unmodified (untargeted) scRNA-seq and in the bulk RNA-seq performed by Battich and colleagues, while *SCN9A* and *ADRA1D* were found in the bulk RNA-seq only. To carry out a RoCK and ROI scRNA-seq experiment, we combined a 1:1 WTA:TSO library ratio using modified beads with a single capture sequence and a single ROIseq primer for each target and sequencing the library at a depth of over a billion reads (Supp Figure 10d-f, Supp Figure 12a-b). During analysis and to make library sizes comparable across the RoCK and ROI and BD Rhapsody experiments, we downsampled the latter at the level of the FASTQ file (see Methods, Supp Figure 10g-i). *RAB4B* and *FOXP3* were enriched for in the RoCK and ROI scRNA-seq experiment (Supp Figure 12c-f). A single alignment was detected for *KRT23*, *SCN9A* and *ADRA1D* (Supp Figure 12c). *EHD3* and *SOX9* remained undetected in the RoCK and ROI experiment (Supp 12c).

This experiment allowed us to probe the limits of RoCK and ROI detection, showing that this method can slightly improve the detection of very lowly expressed genes (e.g., *FOXP3* at 0.22 copies per cell, Supp Figure 12), while others remained poorly detectable or undetected. To improve target detection, multiple RoCK and ROI primer pairs should be tested to optimize capture and priming sites. Notably, bDNA sm-FISH signals for the targeted transcripts were minimally above the detection threshold, suggesting extremely low expression in the cells used for scRNA-seq. In addition, and consistent to our results using BD Rhapsody, only four out of the seven targets were detected even by bulk RNA-seq, underscoring the challenge of reliably detecting single-copy transcripts with current RNA-seq methods.

## Supplementary Figures

**Supplementary Figure 1:** Sequence information on BD Rhapsody barcoded beads and size of RoCKseq modified beads

**Supplementary Figure 2:** Design of splints for RoCKseq bead modification

**Supplementary Figure 3:** Validation of RoCKseq bead modification

**Supplementary Figure 4:** Comparison of RoCK and ROI and standard BD Rhapsody library generation

**Supplementary Figure 5:** Structure of transgenic construct in cell lines, quality control metrics for scRNA-seq experiment to test addition of T primer and position of RoCK and ROI primers in constructs

**Supplementary Figure 6:** Quality control metrics on WTA data for scRNA-seq experiment using mix of cell lines to test RoCK and ROI performance

**Supplementary Figure 7:** Comparison of transcriptome for scRNA-seq experiment using mix of cell lines to test RoCK and ROI performance

**Supplementary Figure 8:** Analysis of target data from scRNA-seq experiment using mix of cell lines to test RoCK and ROI performance and effect of cell area on quantification of *eGFP* mRNAs

**Supplementary Figure 9:** Analysis of unmodified condition performed on HeLa cells

**Supplementary Figure 10:** Quality control on unmodified and modified conditions performed on HeLa cells

**Supplementary Figure 11:** Heatmaps on transcript detection in scRNA-seq compared to bDNA sm-FISH

**Supplementary Figure 12:** Analysis of modified experiment performed on HeLa cells

**Supplementary Figure 13:** Characterization of TSO data from RoCK and ROI experiments

**Supplementary Figure 14:** Flow of reads during RoCK and ROI scRNA-seq human and mouse mixing experiments

**Supplementary Figure 15:** *Pdgfra* locus, capture, regions of interest and bead modification

**Supplementary Figure 16:** Cell gating for murine colonic cells

**Supplementary Figure 17:** Quality control of *Pdgfra* scRNA-seq experiment, descriptive analysis and splicing quantification

**Supplementary Figure 18:** Detection of *Pdgfra* alternative splicing

**Supplementary Figure 19:** Detection of the *BCR::ABL1* fusion transcript in leukemia cells

**Supplementary Figure 20:** Analysis of artificially primed products (APPs)

**Supplementary Figure 21:** Comparison of *BCR::ABL1* positive and negative monocytes



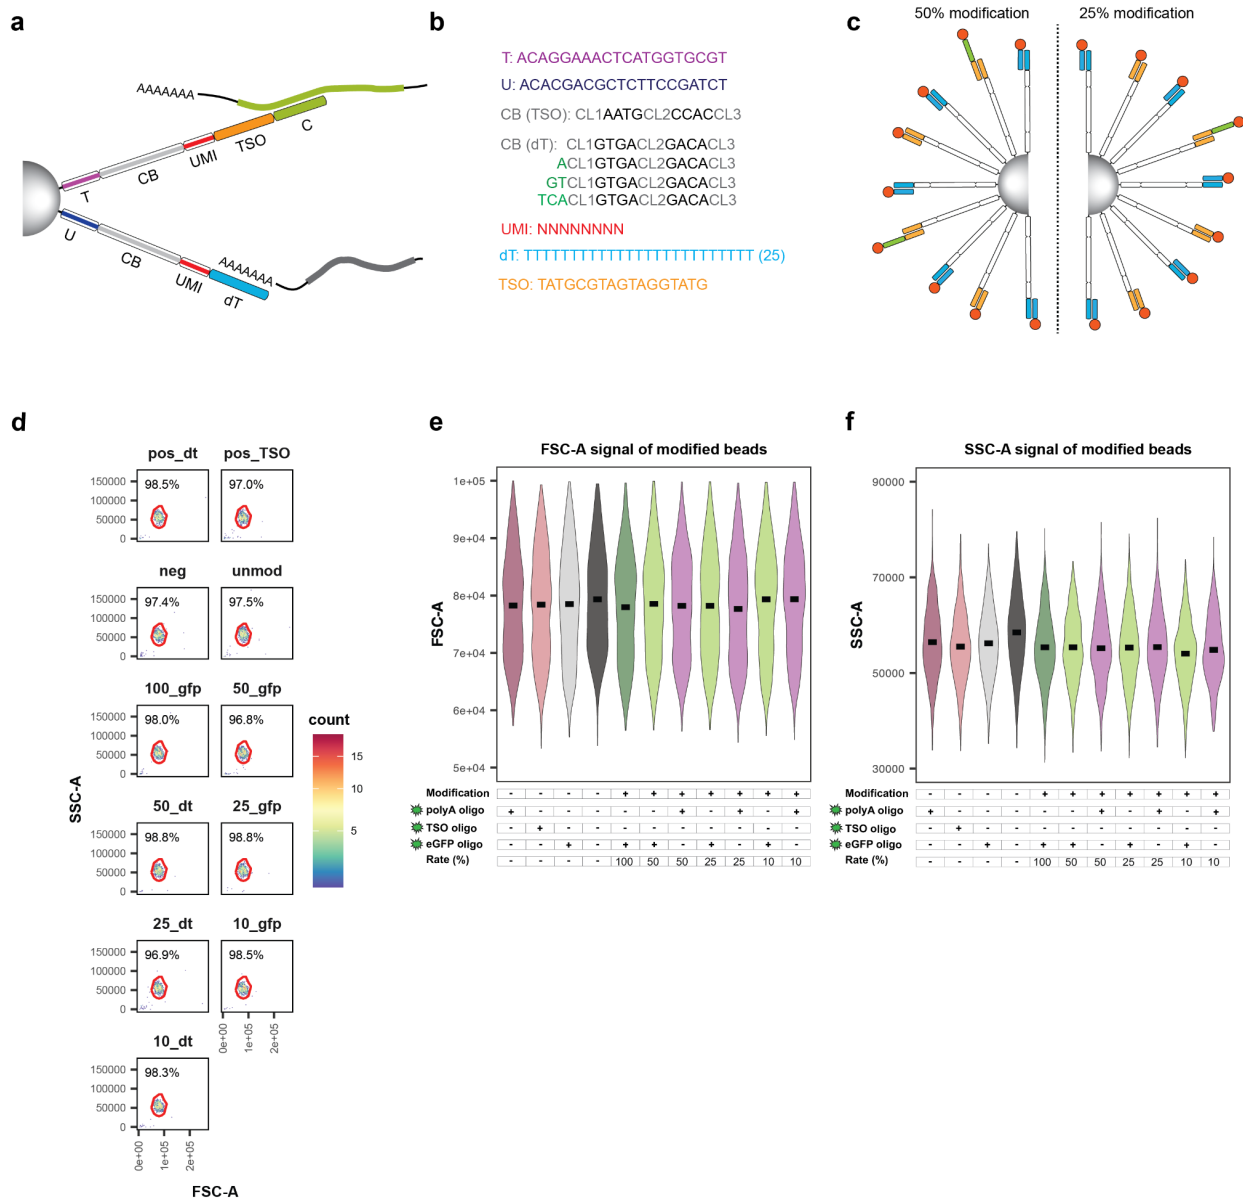

**Supp Figure 1: Sequence information on BD Rhapsody barcoded beads and size of RoCKseq modified beads**

**a**, RoCKseq BD Rhapsody beads. T: T primer, U: universal primer, CB: cell barcode, UMI: unique molecular identifier, TSO: template switching oligo, C: capture sequence added to the beads. **b**, Bead elements' sequence: T and Universal primers (U primers); CB (TSO): cell barcodes on TSO oligos; CB (dT): cell barcodes on WTA oligos; UMI; dT (WTA oligos); TSO (TSO oligos). **c**, Titration of RoCKseq modification; left 50% modification, right: 25% modification. The TSO titration oligo is also 5' phosphorylated (red circle) as it requires removal by the lambda exonuclease. **d-f**, Size of barcoded beads after titration of RoCKseq modification. **For panels (e-f)**: The Y-axis has a biexponential transformation.

**a**

**cDNA sequence eGFP**

GAAGCTTGGGCTGCAGGTCGACTCTAGAGGATCCCCGGGTACCGGTGCGCACCATGGTGAGCAAGGGCGAGGAGCTGTTACCGGGGTGGTGGCCATCCTGGTCGAGCTGGACGG  
CGACGTAAACGGCCACAAGTTCAGCGTGTCCGGCGAGGGCGAGGGCGATGCCACCTACGGCAAGCTGACCCCTGAAGTTCATCTGCACACCGGCAAGCTGCCGTGCCCTGGCCC  
ACCCCTCGTGACCAACCTGACCTACGGCGTGAGTGTTCAGCCGCTACCCCGACCATGAAGCAGACGACGACTTCTCAAGTCCGCCATGCCGAAGGCTACGTCCAGGAGCGCAC  
CATCTTCTTCAAGGACGACGGCAACTACAAGACCCGCGCGAGGTGAAGTTCAGGGCGACACCCCTGGTGAACCGCATCGAGCTGAAGGGCATCGACTTCAAGGAGACGGCAACA  
TCCTGGGGCACAAGCTGGAGTACAACACAAGCCACAAGCTCTATATCATGGCCGACAAGCAGAGAAGACGGCATCAAGGTGAACCTCAAGATCCGCCACAACATCGAGGACGGCA  
GCGTGACGCTCGCCGACCACTACCAGCAGAACACCCCATCGGCGACGGCCCGTGTCTGCTGCCGACAACTACCTGAGCACCAGTCCGCCCTGAGCAAGACCCCAACGA  
GAAGCGCGATCA**CATGGTCTGCTGGAGTTCGTGACC**GCCGCCGGGATCACTCTCGGCATGGACGAGCTGTACAAGTAA**GCGGCCGCGACTCTAGAATTCGATATCAAGCTTATCGAT**  
AATCAACCTCTGGATTACAAAATTTGTGAAGATTGACTGGTATTCTTAACATATGTTGCTCTTTACGCTATGTGGATACGCTGCTTAATGCCCTTGTATCATGCTATTGCTTCCCGTATGG  
CTTTCATTTCTCCTCCTGTATAAATCCTGGTGTCTCTTTATGAGGAGTTGTGGCCCGTTGTAGGCAACGTGGCGTGGTGTGCACTGTGTTTGTGACGCAACCCCACTGGTT  
GGGGCATTGCCACCACTGTCACTCTTCCGGGACTTTCGCTTTCCTCCCTCCCTATTGCCACGGCGGAACATCATCGCCGCTGCTTGGCCGCTGCTGGACAGGGGCTCGGCTGT  
TGGGCACTGACAATCCGTGGTGTGTGCGGGAAATCATGCTCTTCTTGGCTGCTCGCCTGTGTTGCCACCTGGATTCTGCGCGGGACGTCCTTCTGCTACGCTCCCTTCGGCCCT  
CAATCCAGCGGACCTTCTTCCCGCGGCTGCTGCCGGCTCTCGCGCTCTTCCGCGCTTCTCGCCTTCCGCCCTCAGACGAGTCGGATCTCCCTTGGGCCGCTCCCGCATCGATA  
CCGTCGACCTCGAGACCTAGAAAAACATGGAGCAATCACAAGTAGCAATACAGCAGCTACCAATGCTGATTGTGCTGGCTAGAGCACAAGAGGAGGAGGAGGTGGTGTTCAGTC  
ACACCTCAGGTACCTTTAAGACCAATGACTTACAAGGCAGCTGTAGATCTTAGCCACTTTTAAAGAAAGGGGGGACTGGAAGGGCTAATTCACCTCCCAACGAGACAAGATATCCTT  
GATCTGTGGATCTACCACACAAGGCTACTTCCCTGATTGGCAGAATACACACAGGGGCCAGGGATCAGATATCCACTGACCTTTGGATGGTGCTACAAGCTAGTACCAGTTGAGCA  
AGAGAAGGTAGAGAAGCCAATGAAGGAGAGAACACCCGCTTGTACACCTGTGAGCCTGCATGGGATGGATGACCCGGAGAGAGAAGTATTAGAGTGGAGTTTGACAGCCGCCT  
AGCATTCATCACATGGCCCGAGAGCTGCATCCGACTGTACT

**b**

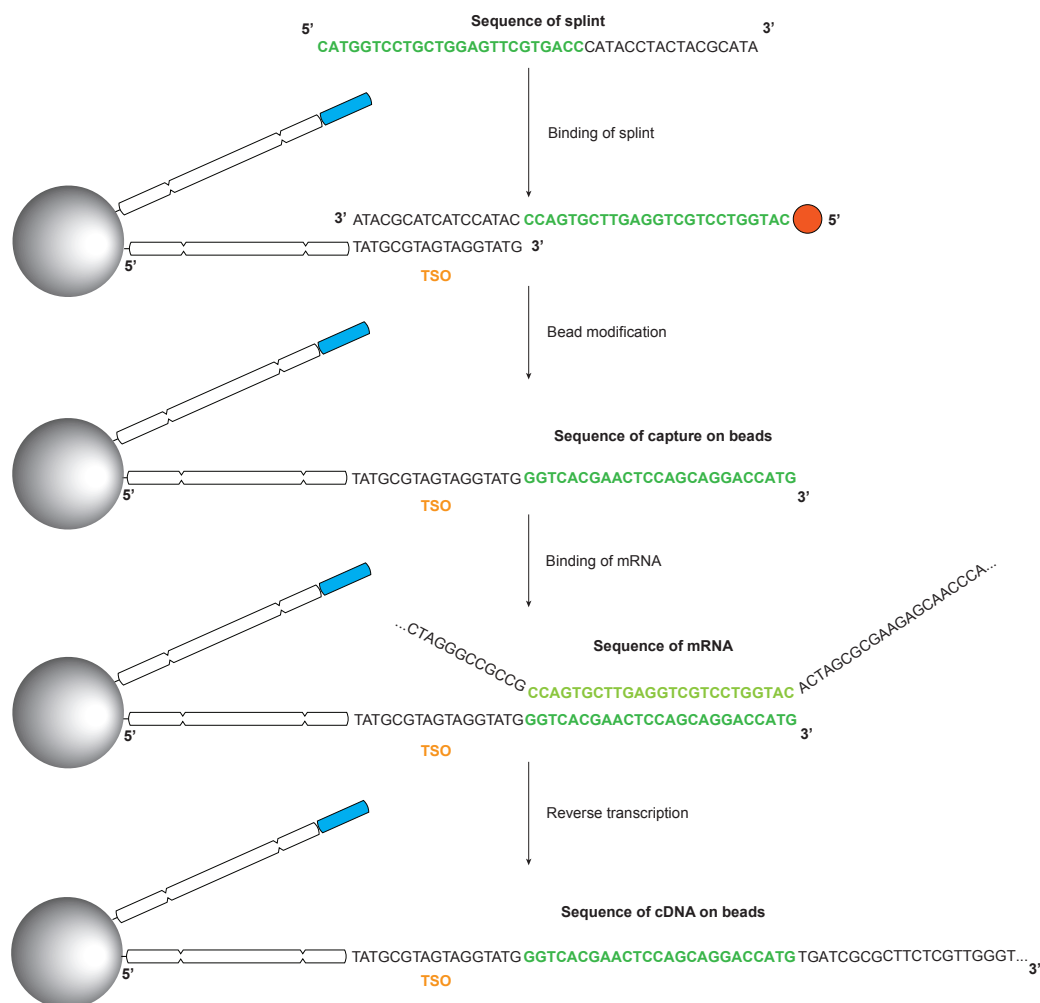

**Supp Figure 2: Design of splints for RoCKseq bead modification**

**a**, eGFP cDNA sequence. Grey: Untranslated Regions (UTRs), black: eGFP CDS, green: capture (RoCKseq) sequence.

**b**, bead modification process to capture eGFP: splint binding, RoCKseq modification and target capture and reverse transcription. The splint contains three elements: a region complementary to the TSO sequence on the beads, the reverse complement of the capture sequence and a 5' phosphate group (red circle).

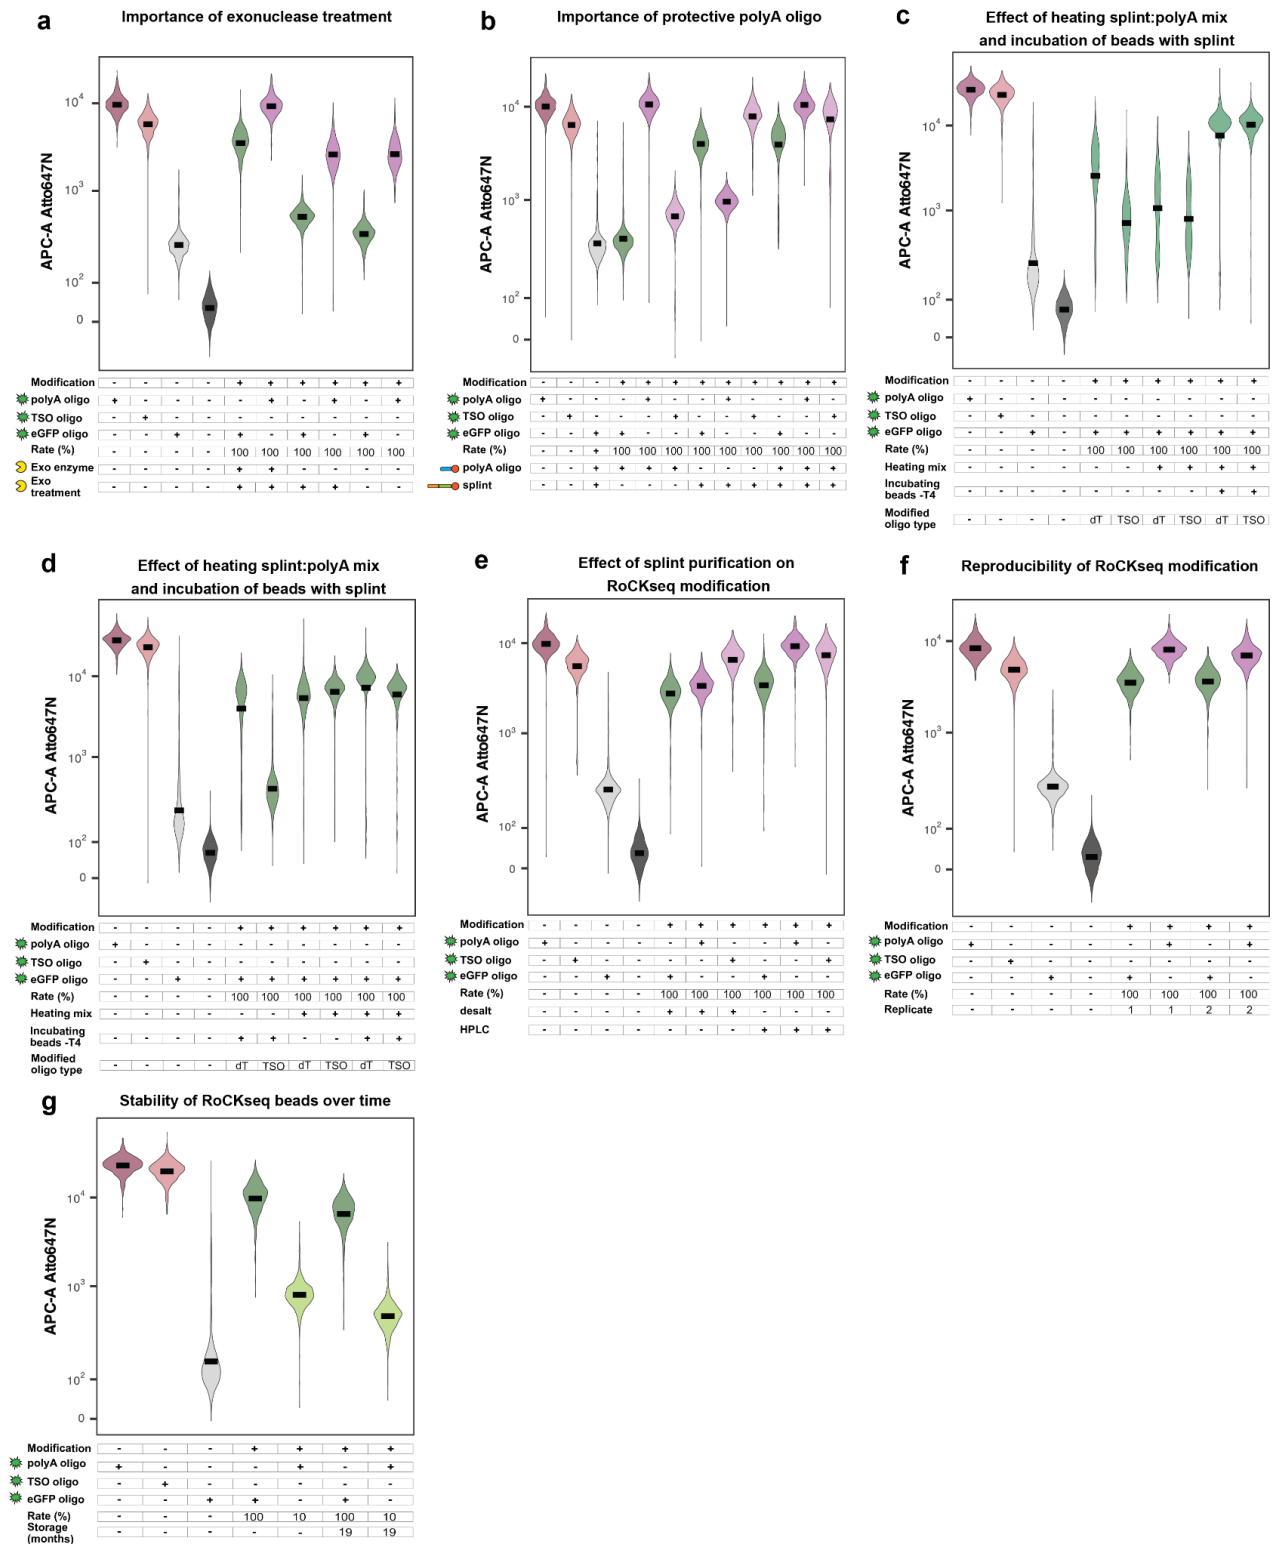

**Supp Figure 3: Validation of RoCKseq bead modification**

**a-g**, FACS quantification of RoCKseq bead modification. Effect of exonuclease treatment during RoCKseq bead modification (**a**). Target: *eGFP* CDS. Exo enzyme: addition of exonuclease enzyme to reaction; Exo treatment: exonuclease step (including buffer and water, no enzyme). Effect of T4 polymerase 3' → 5' exonuclease activity on barcoded bead oligos (**b**). Target: *eGFP* CDS. polyA oligo: only protective polyA oligo used for modification (omission of splint). splint: only splint used for modification (omission protective polyA oligo). Effect of heating of the splint/ polyA mix and incubation of beads with splint before addition of T4 polymerase enzyme (**c**). Target: *eGFP* CDS. Heating mix: splint/ polyA mix was heated to 75°C for 5 minutes; Incubating beads -T4: beads were incubated with the splint at 37°C for 5

minutes before addition of the T4 polymerase. Modified oligo type: modification of dT or TSO oligos on BD Rhapsody beads. Effect of incubation of beads and splint before addition of T4 polymerase enzyme with or without heating of splint/polyA mix **(d)**. Conditions as in **(c)**. Effect of purification level of splint and protective oligo on RoCKseq modification **(e)**. Target: *eGFP* CDS. desalt: RoCKseq bead modification with splint in desalted purification; HPLC: RoCKseq bead modification with splint with HPLC purification. Reproducibility of RoCKseq modification **(f)**. Target: *eGFP* CDS. Replicate: technical replicates of RoCKseq bead modification. Storage of RoCKseq beads **(g)**. Target: *eGFP* CDS.

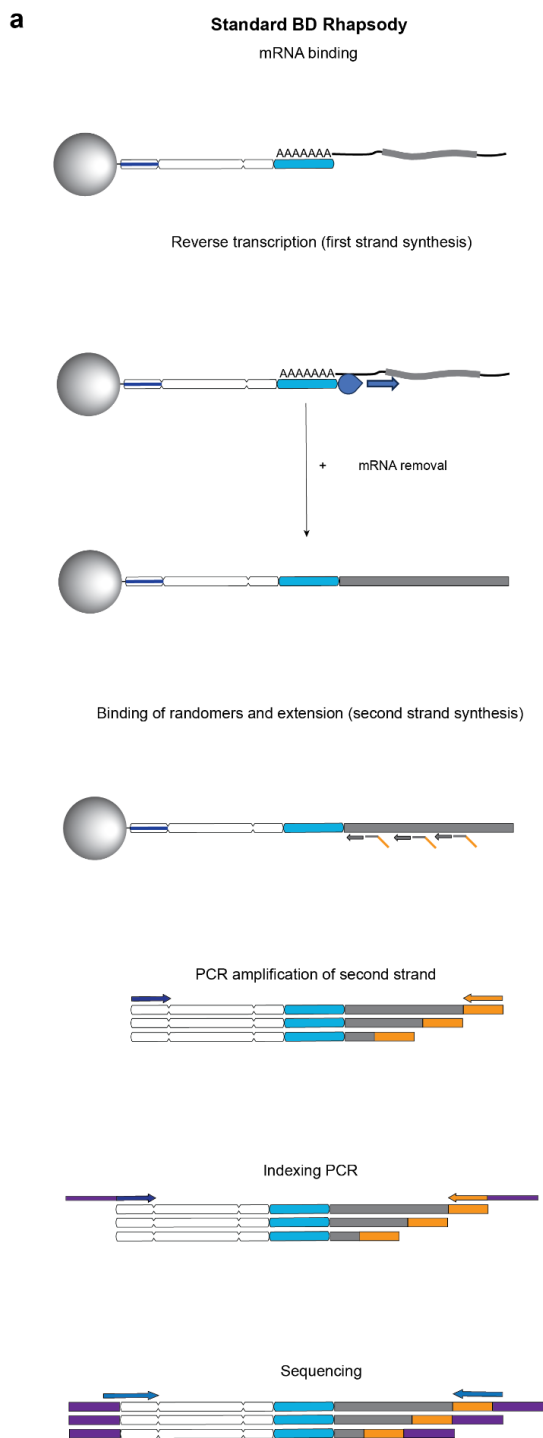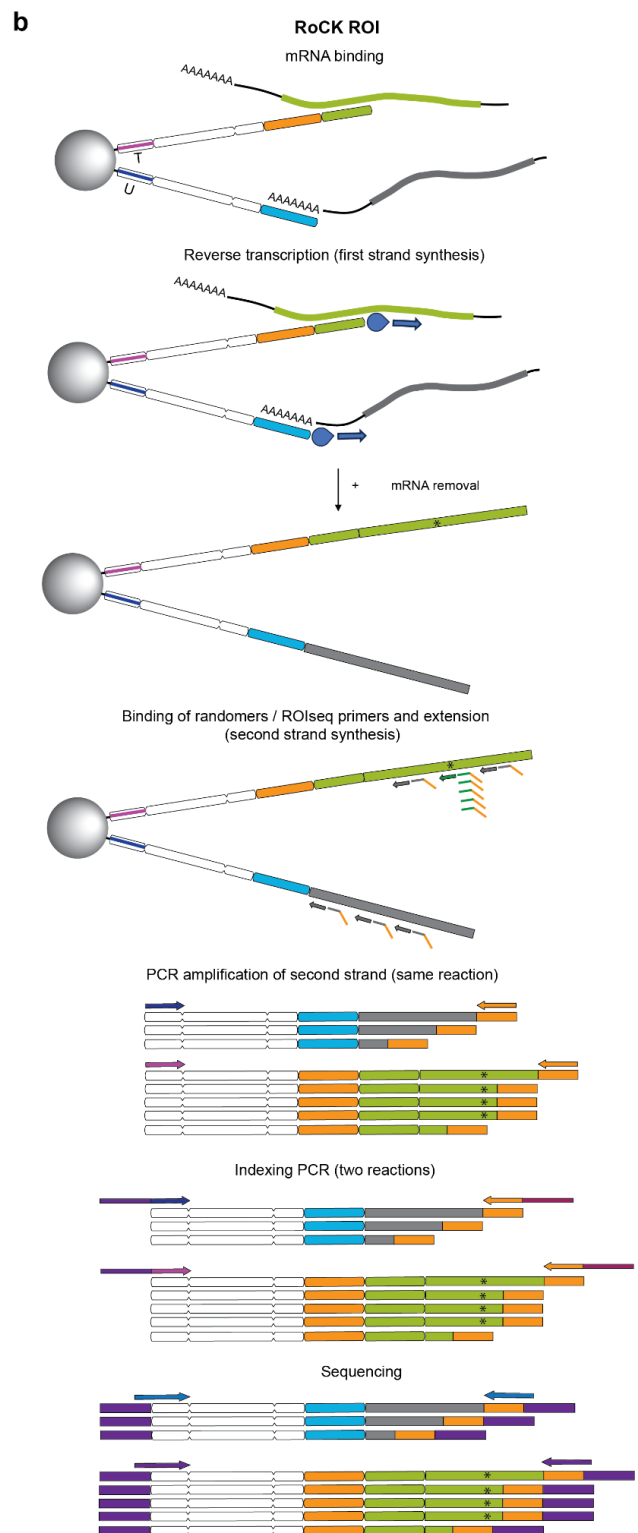

**Supp Figure 4: Comparison of RoCK and ROI and standard BD Rhapsody library generation**

**a**, Standard BD Rhapsody library generation. **b**, RoCK and ROI library generation using RoCKseq beads.



(d) and (e). g-h, MA plots for mouse cells (g) and human cells (h). i, LALIGN local alignment of *eGFP* and *tdTomato* sequences showing the sequence similarities of the two CDSs. Orange: capture sequence used for the mixing experiments. Red: ROIs primers for *tdTomato*. As *tdTomato* is a perfect repeat the ROIs primers will bind twice. Green: ROIs primer for *eGFP*.

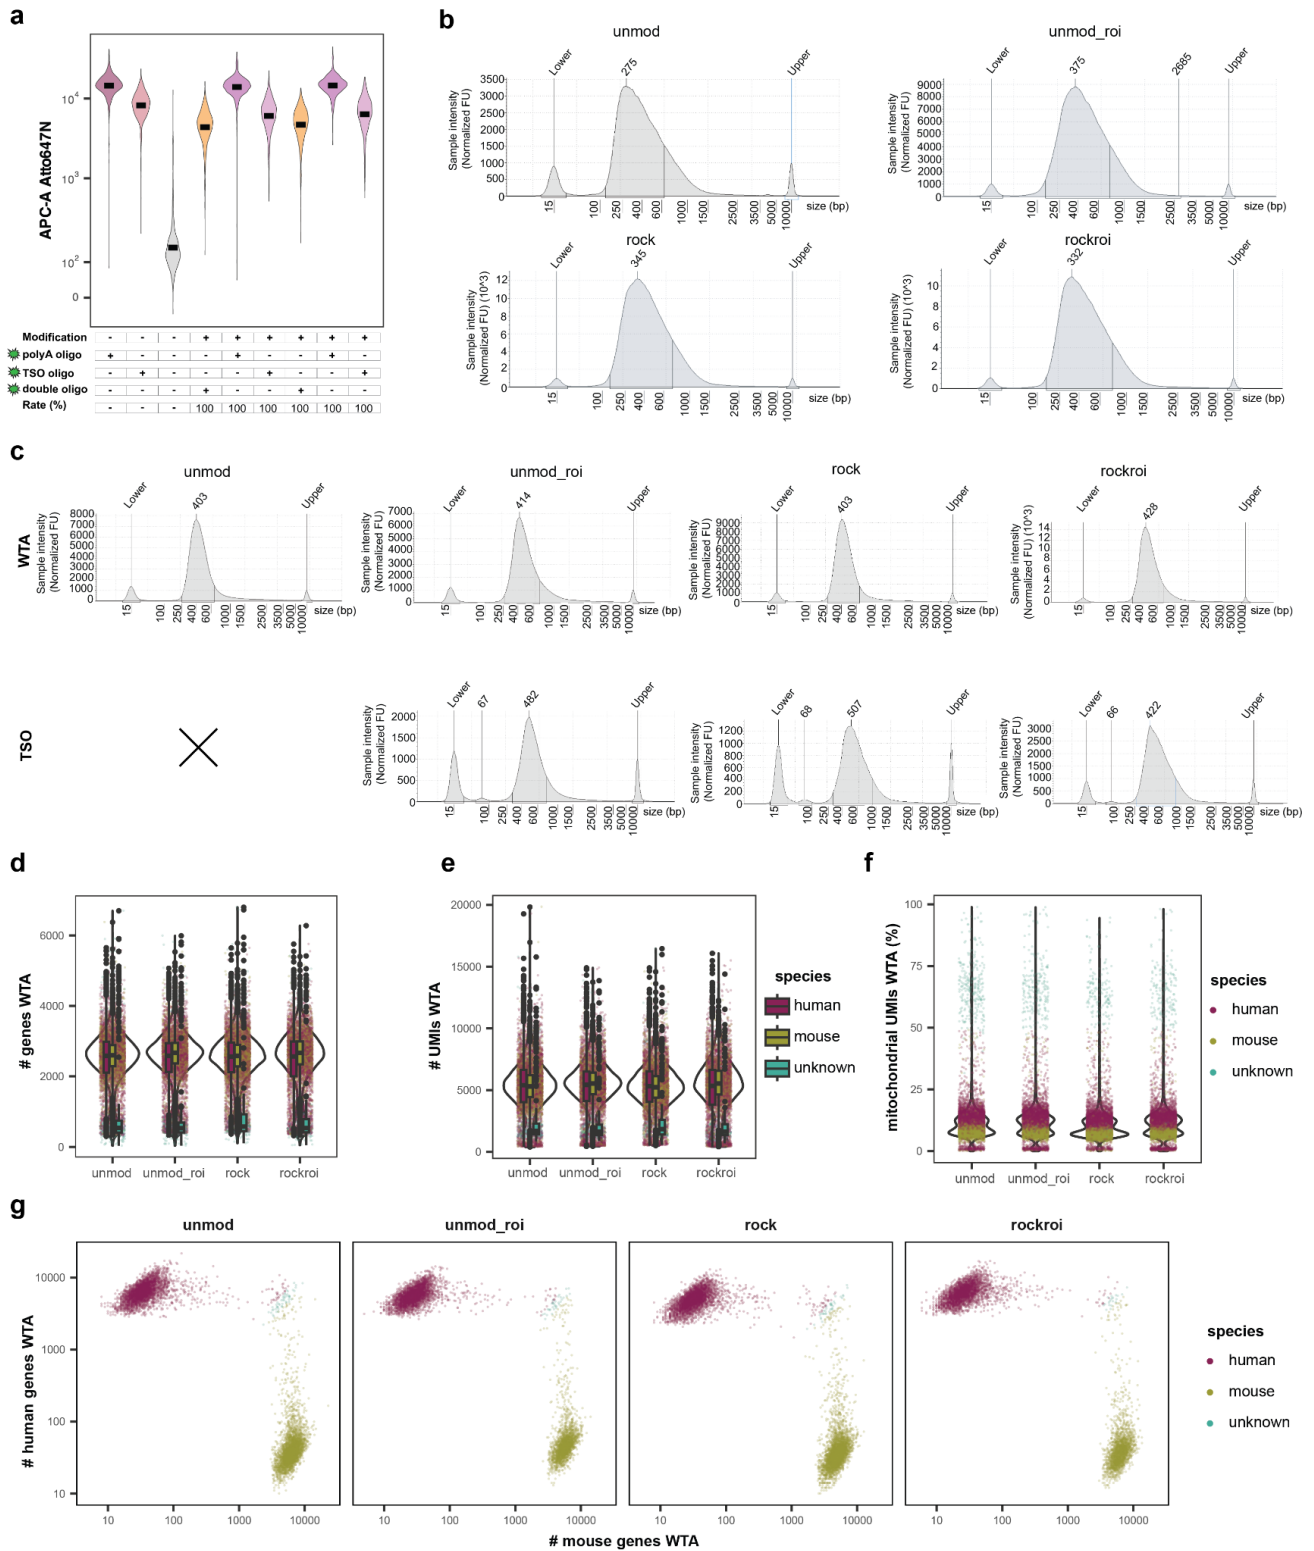

**Supp Figure 6: Quality control metrics on WTA data for scRNA-seq experiment using mix of cell lines to test RoCK and ROI performance**

**a**, FACS signal from modification of beads for scRNA-seq experiment. Y-axis: Atto647N fluorescent signal. The Y-axis has a biexponential transformation. **b-c**, Library sizes for unmod, unmod\_roi, rock and rockroi samples before (**b**) and after (**c**) indexing. **d-f**, Number of genes (**d**), UMIs (**e**) and mitochondrial content (**f**) detected in downsampled WTA data. Figure legend in (**e**) applies to (**d**) and (**e**). **g**, Barnyard plot of species assignment using WTA data per condition.



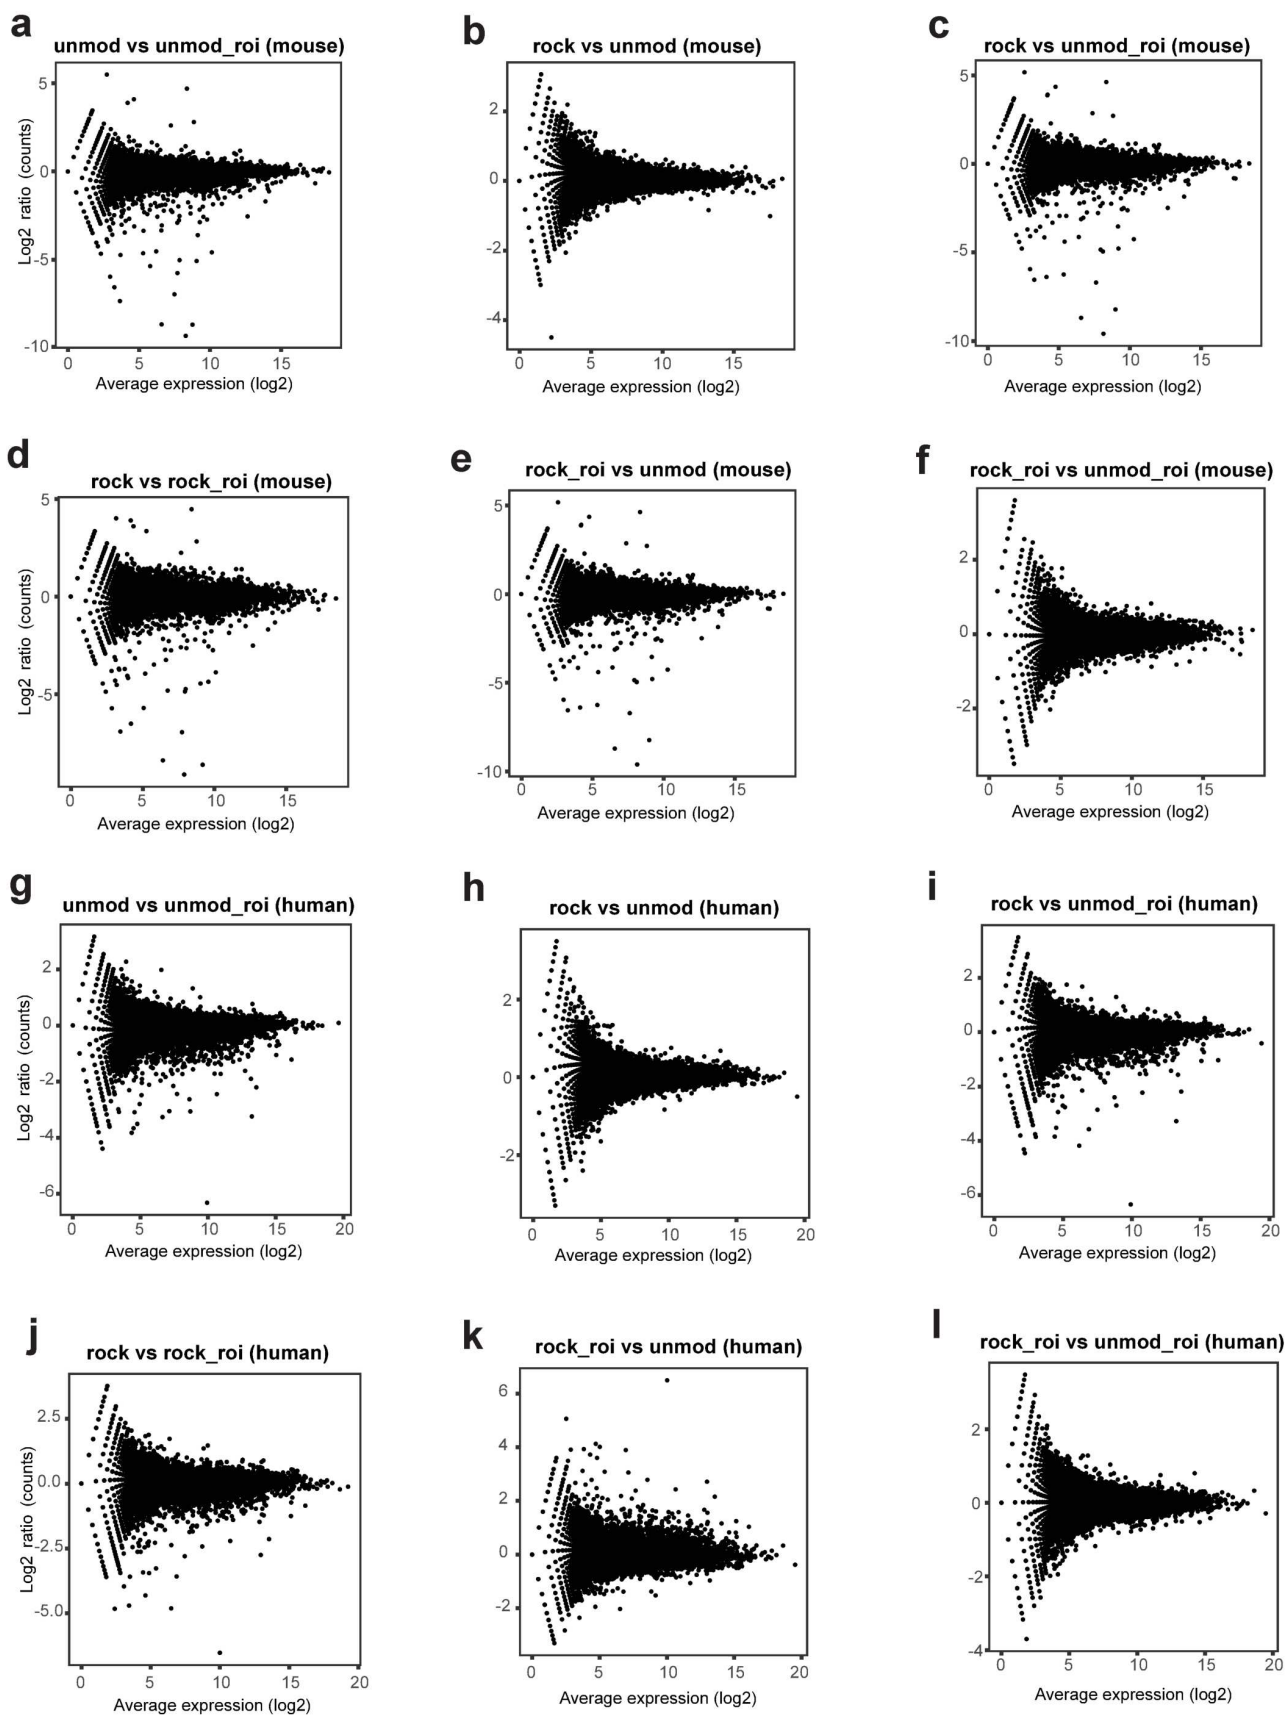

**Supp Figure 7: Comparison of transcriptome for scRNA-seq experiment using mix of cell lines to test RoCK and ROI performance**

a-l: MA plots for mouse cells (a-f) and human cells (g-l).

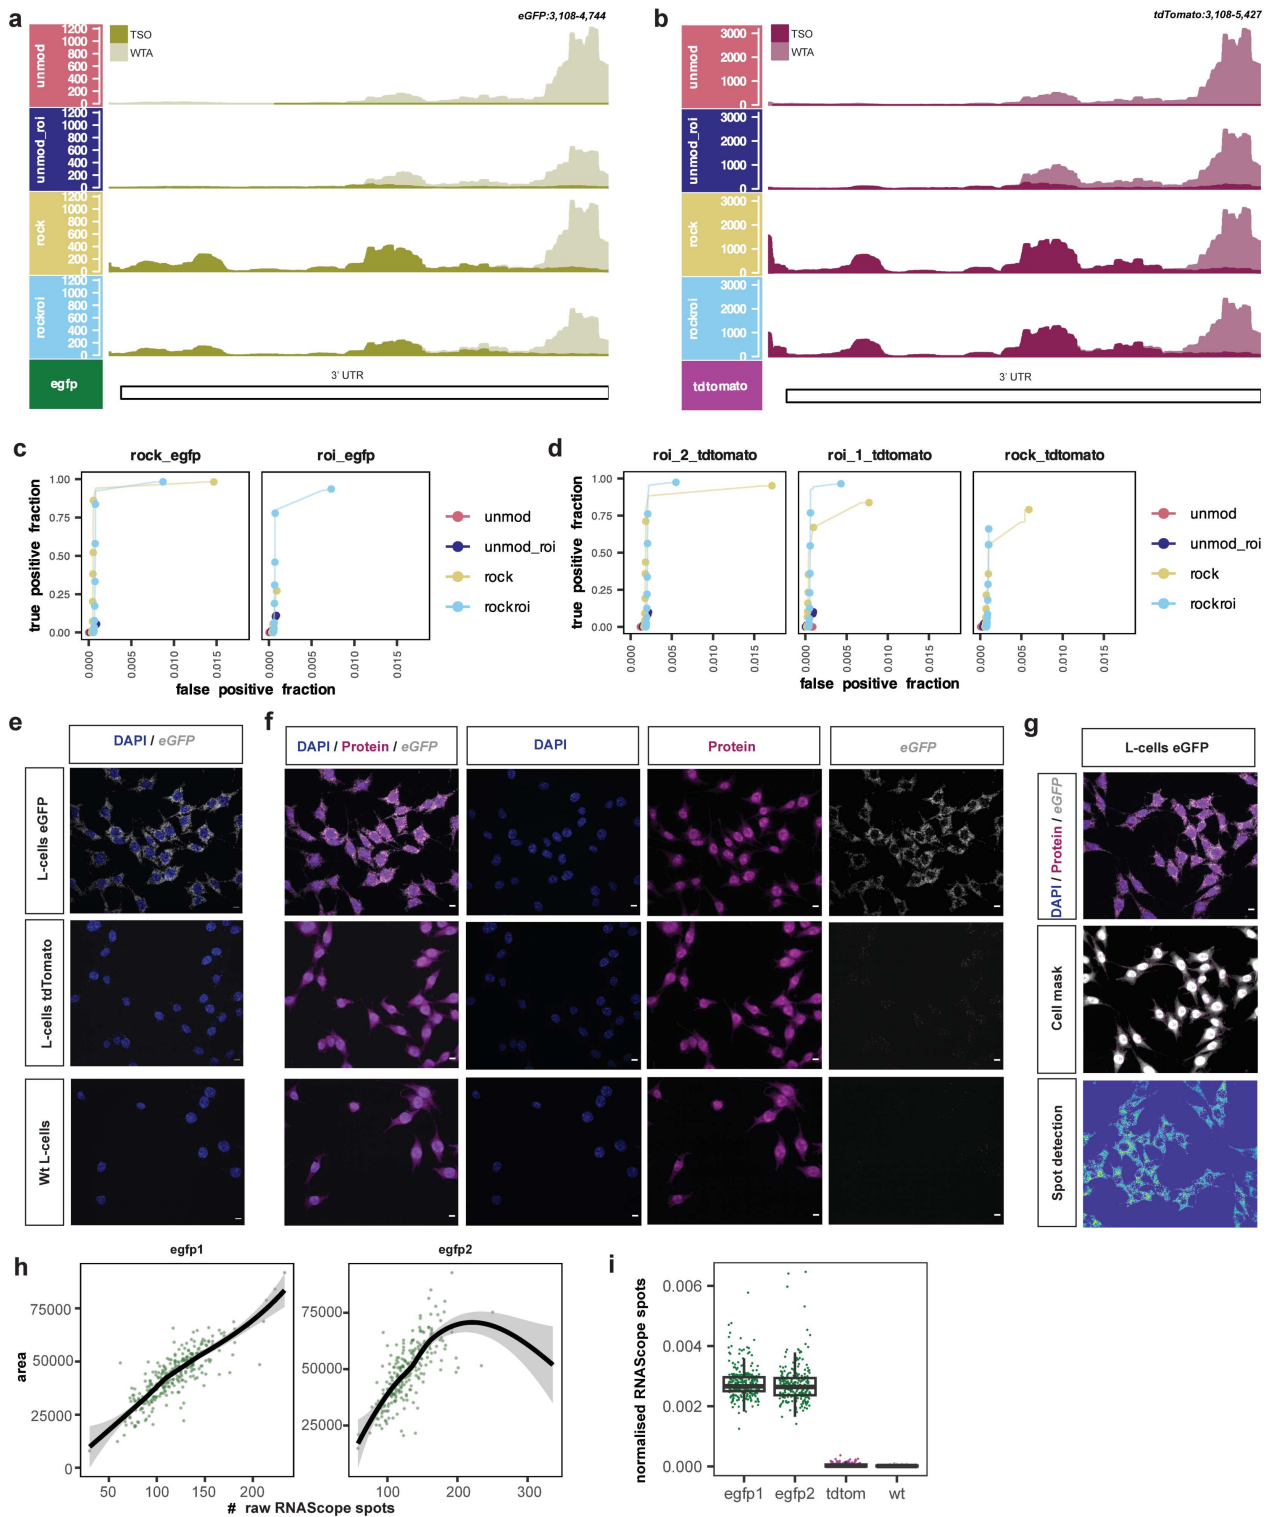

**Supp Figure 8: Analysis of target data from scRNA-seq experiment using mix of cell lines to test RoCK and ROI performance and effect of cell area on quantification of eGFP mRNAs**

**a-b**, Zoom in of 3' UTR from coverage plot in **Figure 4b (a)** and **Figure 4c (b)**. The white bar indicates the zoomed-in 3' UTR. **c-d**, Receiver operating characteristic (ROC) curves indicating the true positive and false positive detection of RoCKseq and ROIseq regions for *eGFP* (**c**) and *tdTomato* (**d**). True positive fraction: detection of *eGFP* in mouse cells or *tdTomato* in human cells, respectively. False positive: detection of *eGFP* in human cells or *tdTomato* in mouse cells, respectively. **e-f**, Detection of *eGFP* transcript in L-cells expressing eGFP, tdTomato or wt L-cells (untransduced) without (**e**) or with (**f**) protein stain. Scale bars: 10  $\mu$ m. **g**, Example of cell mask and spot detection on L-cells expressing eGFP. Scale bars: 10  $\mu$ m. **h**, Number of RNAScope spots versus cell area for the two replicates (egfp1 and egfp2). Source data

are provided as a Source Data file. i, Number of RNAScope spots normalized by cell area. Source data are provided as a Source Data file. Boxplots show the median (center line), the first and third quartiles (bounds of the box; 25th and 75th percentiles), the lower and upper whiskers ( $1.5 \times \text{IQR}$  from the box).

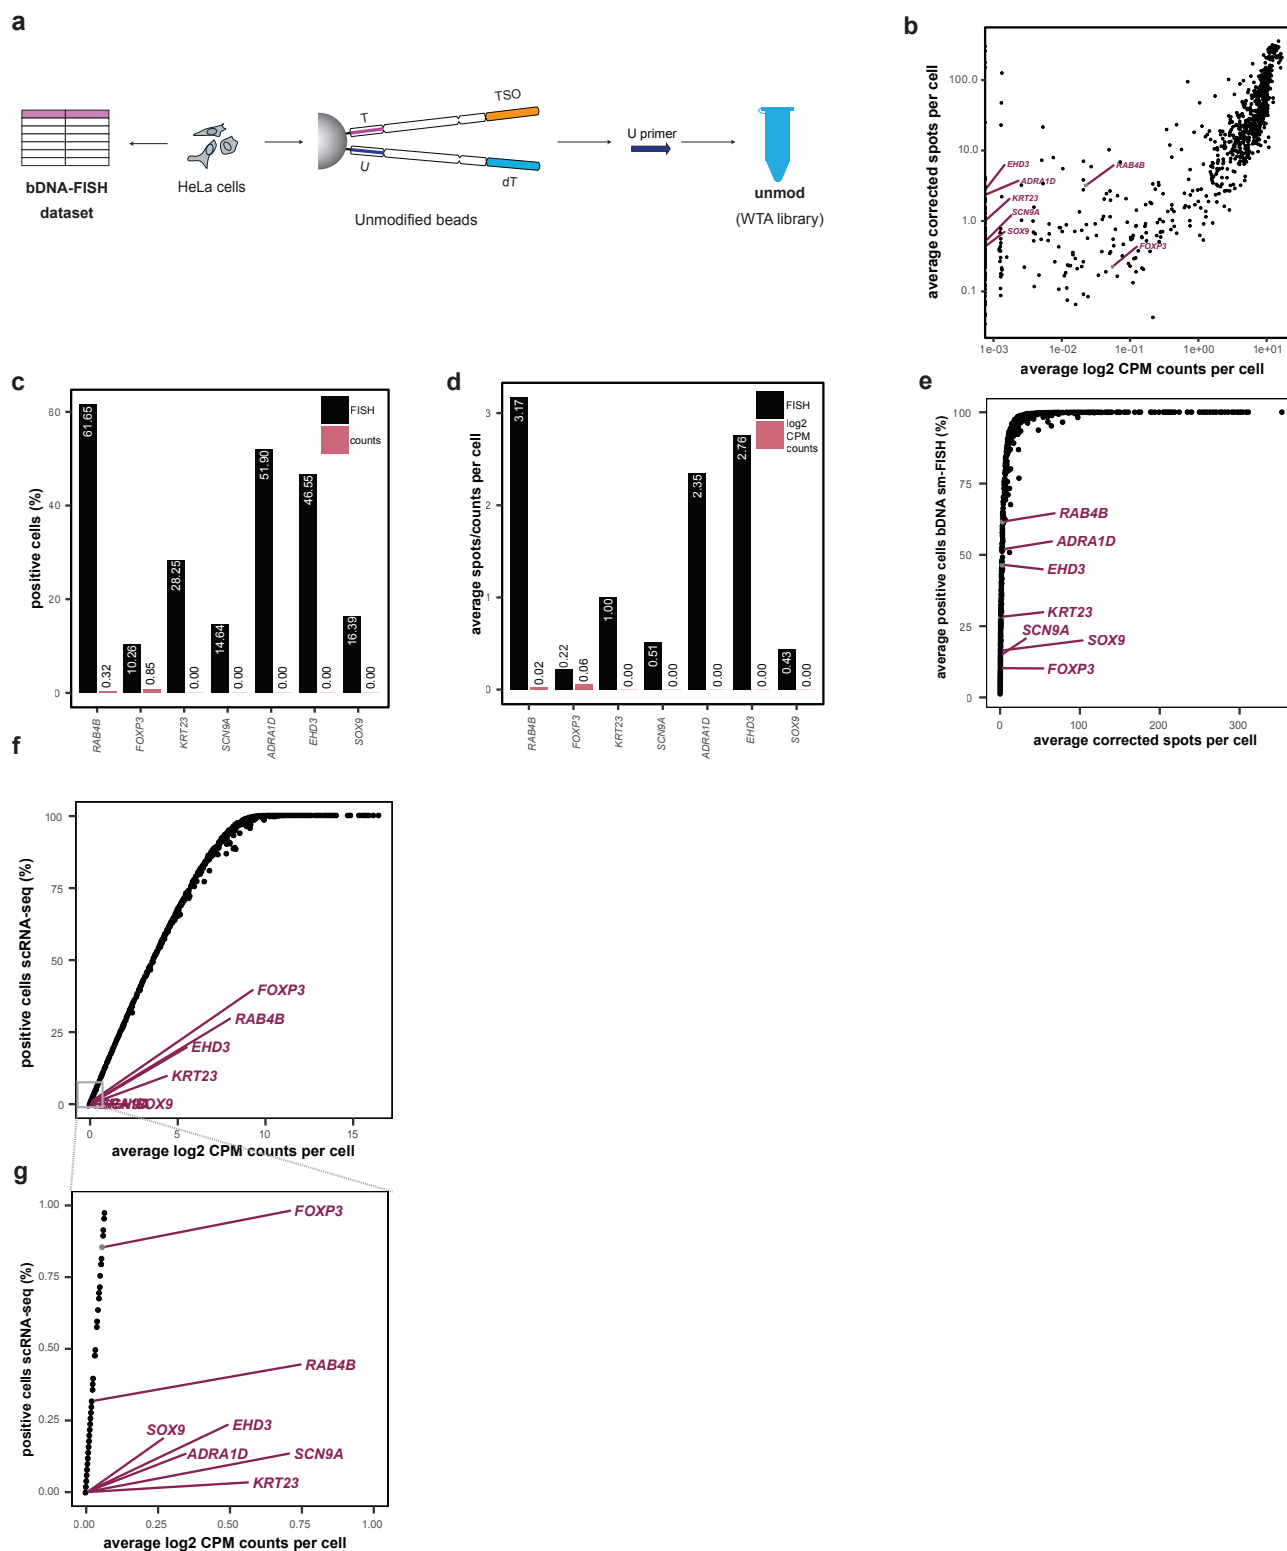

**Supp Figure 9: Analysis of unmodified condition performed on HeLa cells**

**a**, Experimental set up of unmodified condition. Primers: U. **b**, Average log2 CPM counts per cell per gene (each dot represents a gene) versus average corrected spots per cell. Genes which were later targeted in the modified experiment are indicated. **c**, Percent of positive cells with detectable bDNA sm-FISH or counts. **d**, Average bDNA sm-FISH spots or log2 CPM counts per cell. **e**, Average corrected spots per cell versus average positive cells detected in bDNA sm-FISH. Genes which were later targeted in the modified experiment are indicated. **f**, Average log2 CPM counts per cell per gene (each dot represents a gene) versus average positive cells detected in scRNA-seq. Genes which were later targeted in the

modified experiment are indicated. **g)** Zoom in of panel **(f)**. Average corrected spots per cell **(b-e)** calculated on genes detected in both bDNA sm-FISH replicates.

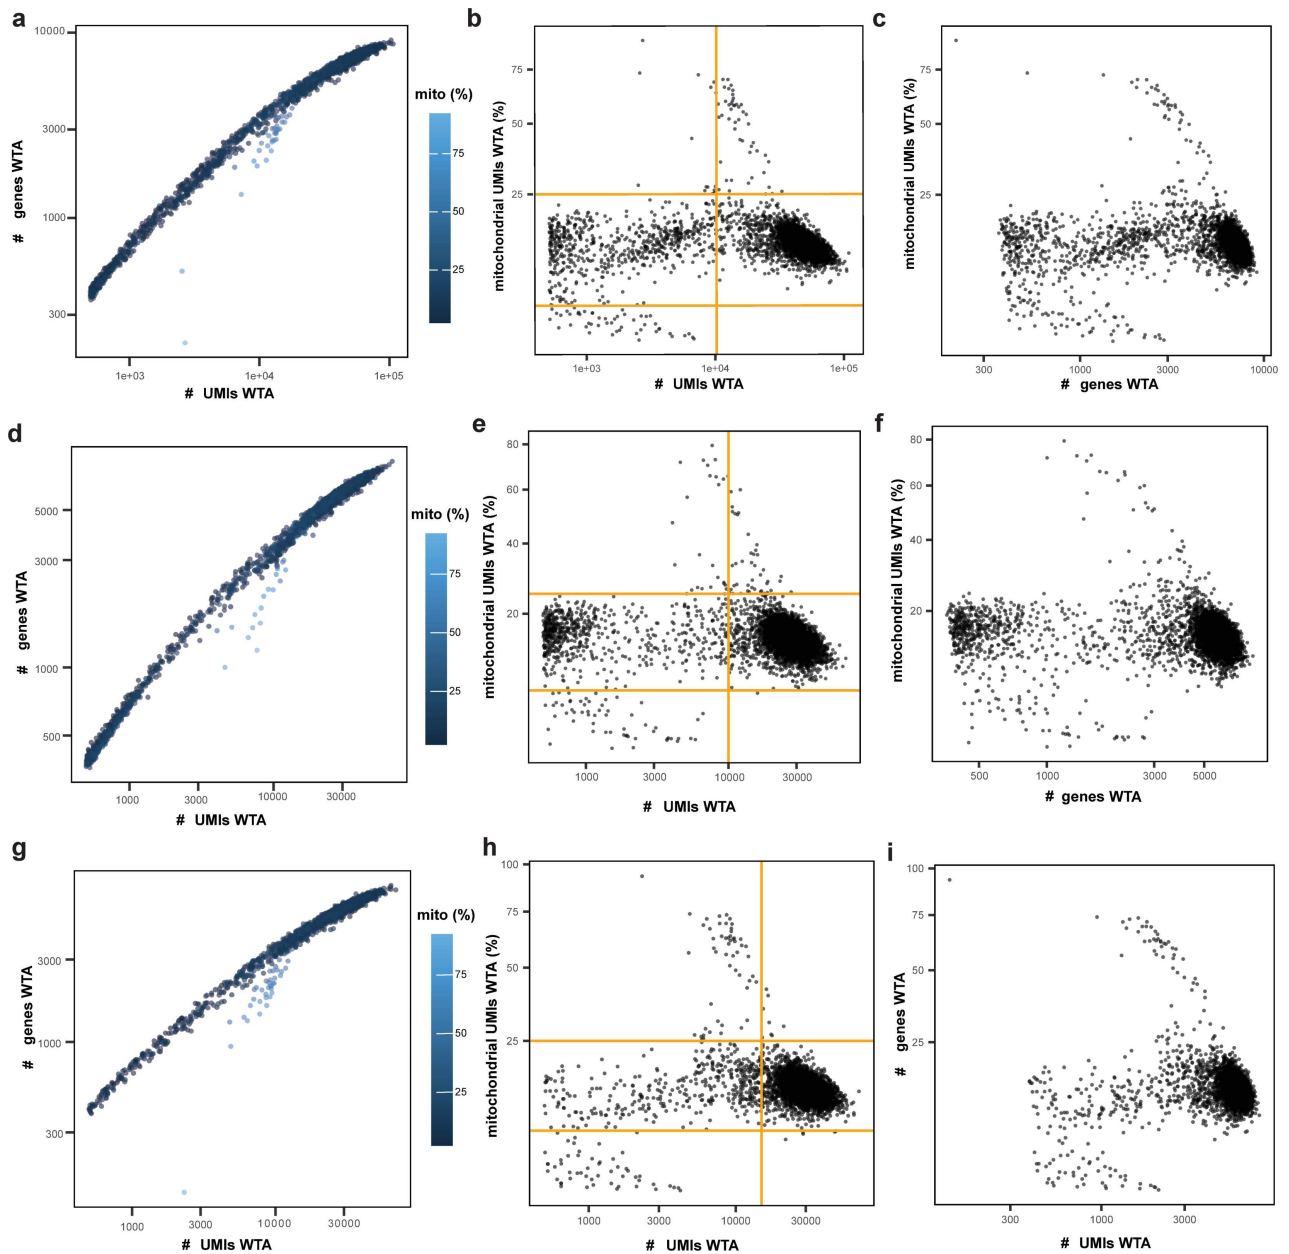

**Supp Figure 10: Quality control on unmodified and modified conditions performed on HeLa cells**

**a**, Number of genes versus number of UMIs colored by mitochondrial content, unmodified sample. **b**, Mitochondrial content versus number of UMIs, unmodified sample. **c**, Mitochondrial content versus number of genes, unmodified sample. **d**, Number of genes versus number of UMIs colored by mitochondrial content, modified sample. **e**, Mitochondrial content versus number of UMIs, modified sample. **f**, Number of genes versus number of UMIs colored by mitochondrial content, modified sample. **g**, Number of genes versus number of UMIs colored by mitochondrial content, downsampled unmodified sample. **h**, Mitochondrial content versus number of UMIs, downsampled unmodified sample. **i**, Mitochondrial content versus number of genes, downsampled unmodified sample. Orange lines: QC filtering thresholds.

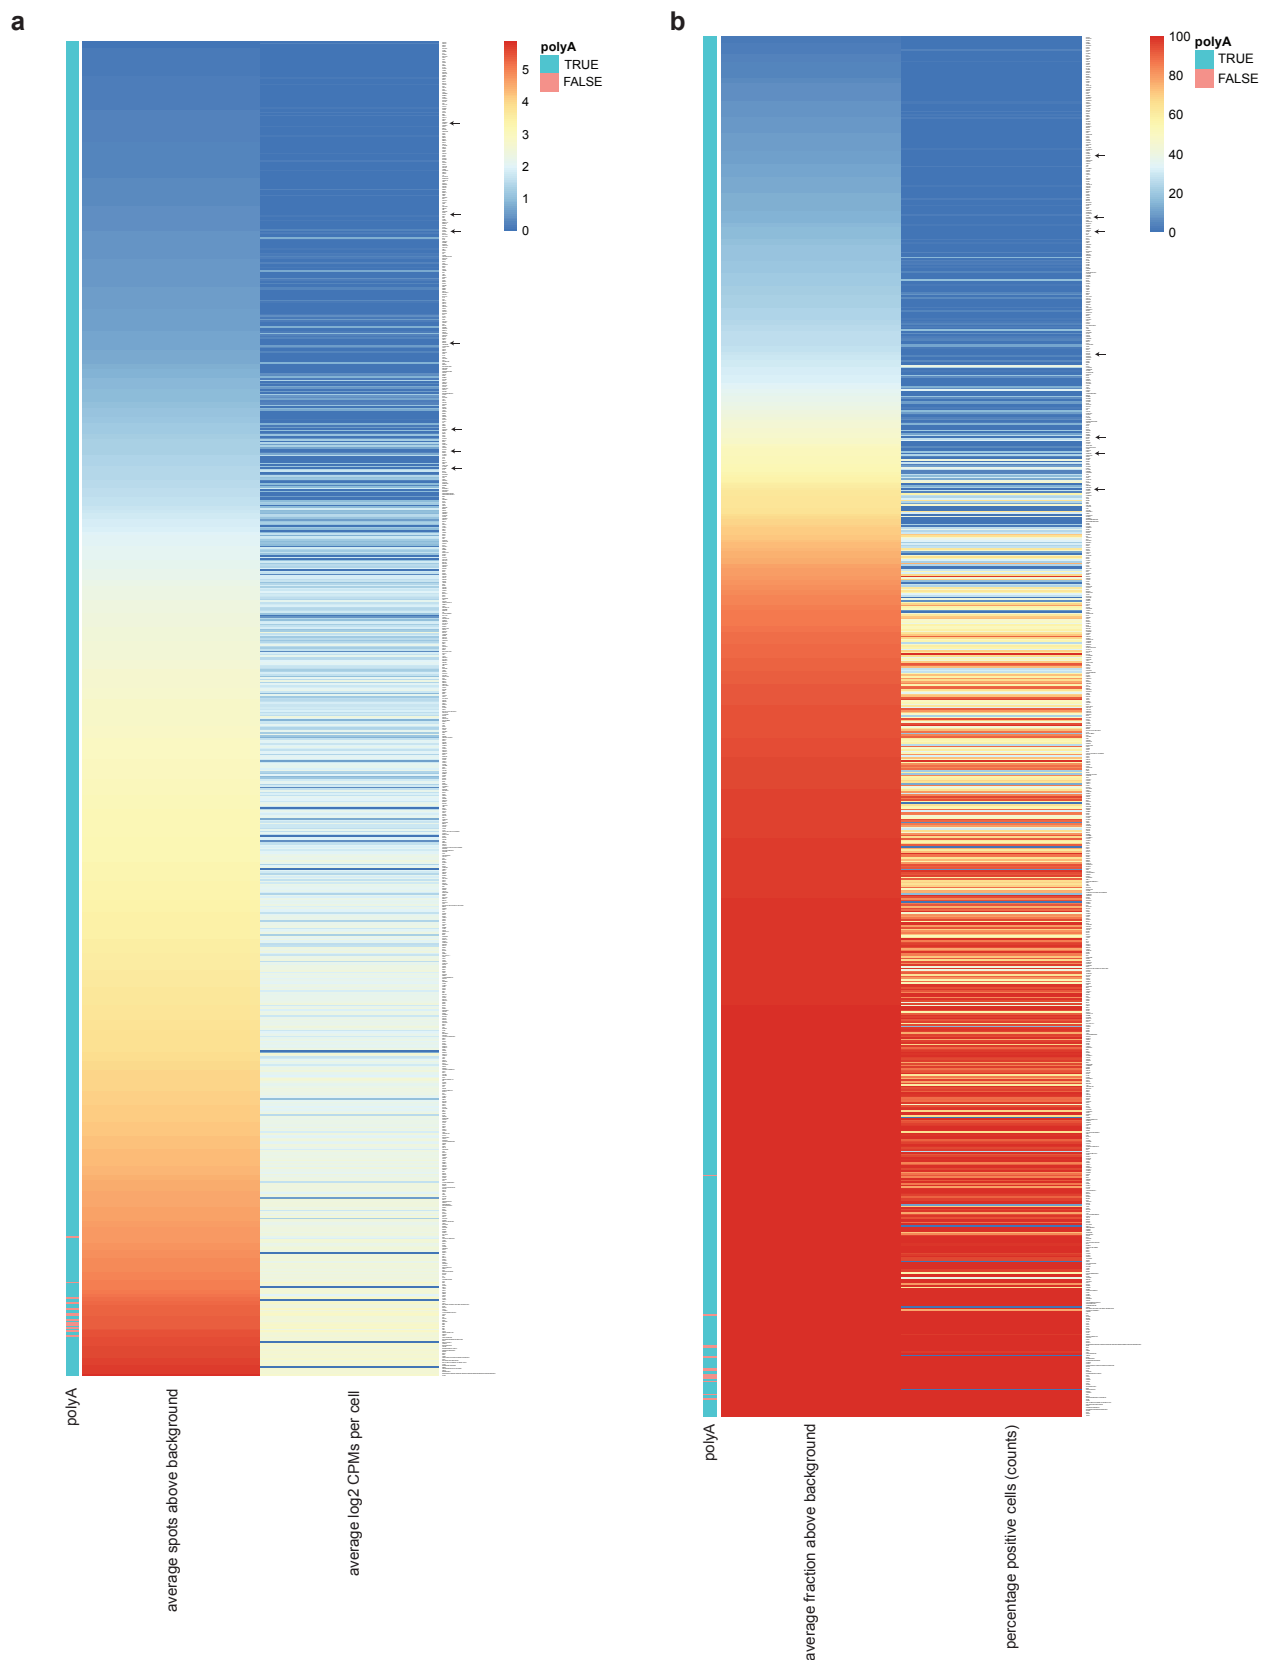

**Supp Figure 11: Heatmaps on transcript detection in scRNA-seq compared to bDNA sm-FISH**

**a**, Average spots above background (bDNA sm-FISH) compared to average log2 CPMs per cell. Average corrected spots per cell calculated on genes detected in both bDNA-FISH replicates. **b**, Average fraction above background (bDNA sm-FISH) compared to percentage of positive cells (counts)

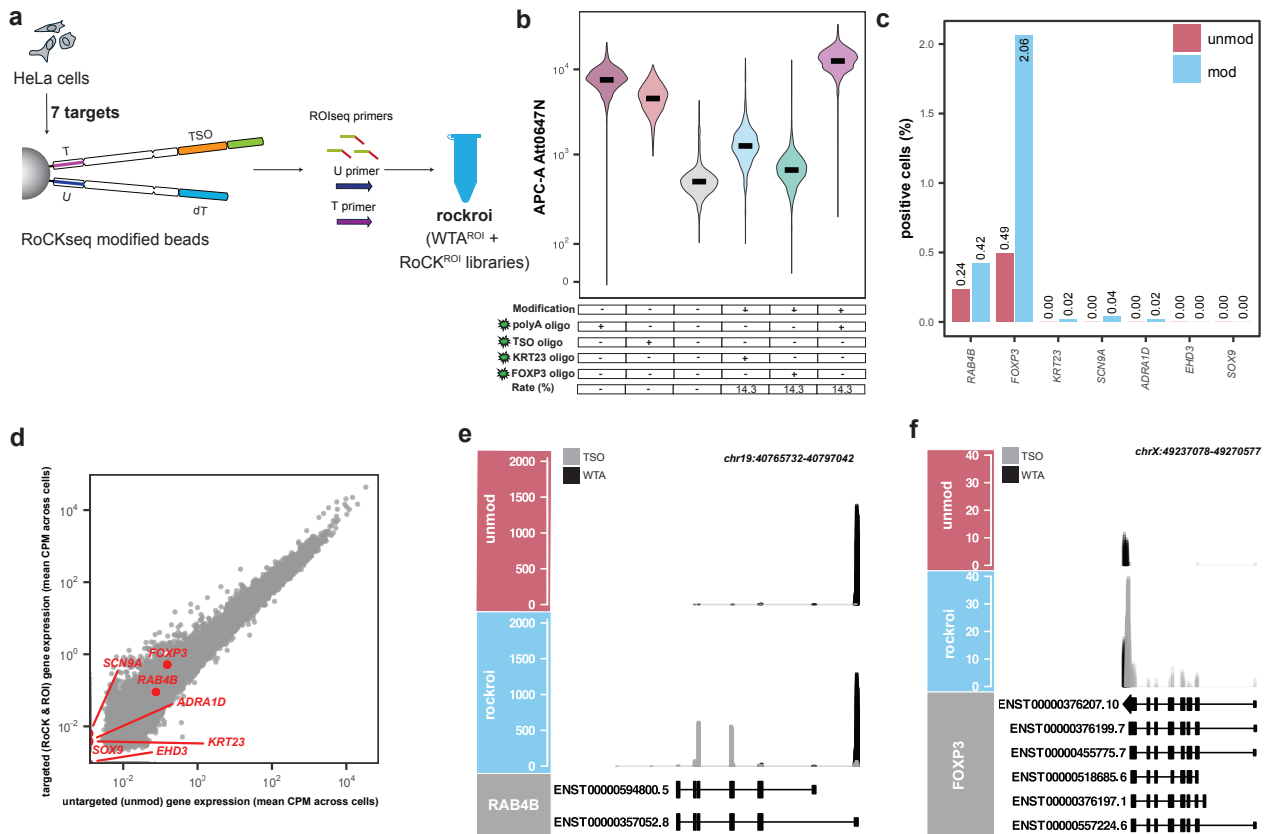

**Supp Figure 12: Analysis of modified experiment performed on HeLa cells**

**a**, Experimental set up of unmodified condition. Primers: U and T. **b**, FACS signal from modification of beads for scRNA-seq experiment. Y-axis: Atto647N fluorescent signal. The y axis has a biexponential transformation. **c**, Percent of positive cells for the seven targets in the modified compared to the unmodified sample. **d**) Mean CPMs across cells for unmodified versus modified sample. Red dot indicates the targeted transcripts. Unique alignments were considered for all genes. **e-f**, Sequence coverage for TSO (grey) and WTA (black) along **(e)** RAB4B, **(f)** FOXP3. Plots **(c-f)**: plots were made using a downsampled unmodified data (see Methods)



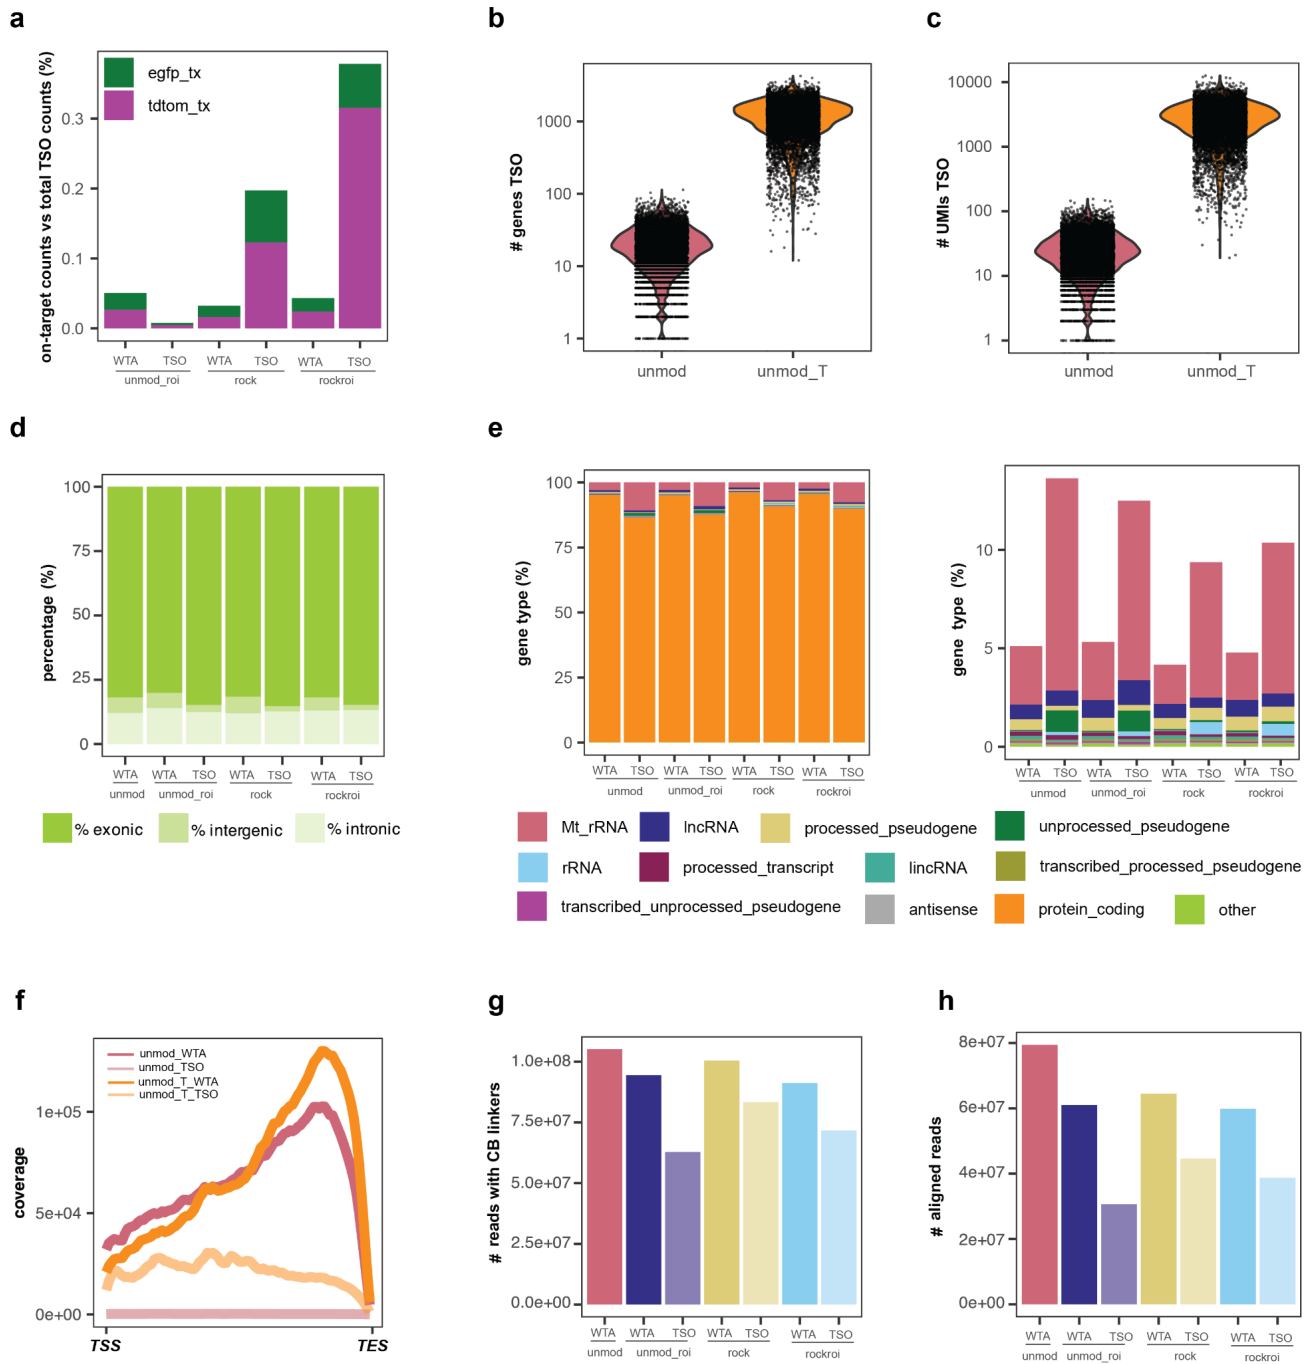

**Supp Figure 13: Characterization of TSO data from RoCK and ROI experiments**

**a**, On-target counts versus total TSO counts for *eGFP* and *tdTomato* across conditions, including CDS and UTRs. **b-c**, Number of genes (**b**) and UMIs (**c**) detected in the TSO data. **d**, Percent exonic, intergenic and intronic alignments in WTA and TSO data. **e**, Top 11 gene biotypes detected in TSO and WTA data with (right) and without (left) protein coding genes (**e**). Other: all other gene types not in the top 11. **f**, Aggregated gene body sequencing coverage along all transcripts detected in TSO and WTA TSS: transcription start site, TES: transcription end site. **g**, Number of raw reads with canonical WTA and TSO cell barcodes, regardless of whitelists. **h**, Number of aligned reads (**h**). Numbers indicate the total number of alignments. Data in panels (**a**, **d-e**, **g-h**) refer to experiment described in **Figure 3 (a)**, data in panels (**b-c**, **f**) refer to experiment described in **Figure 2 (b)**.

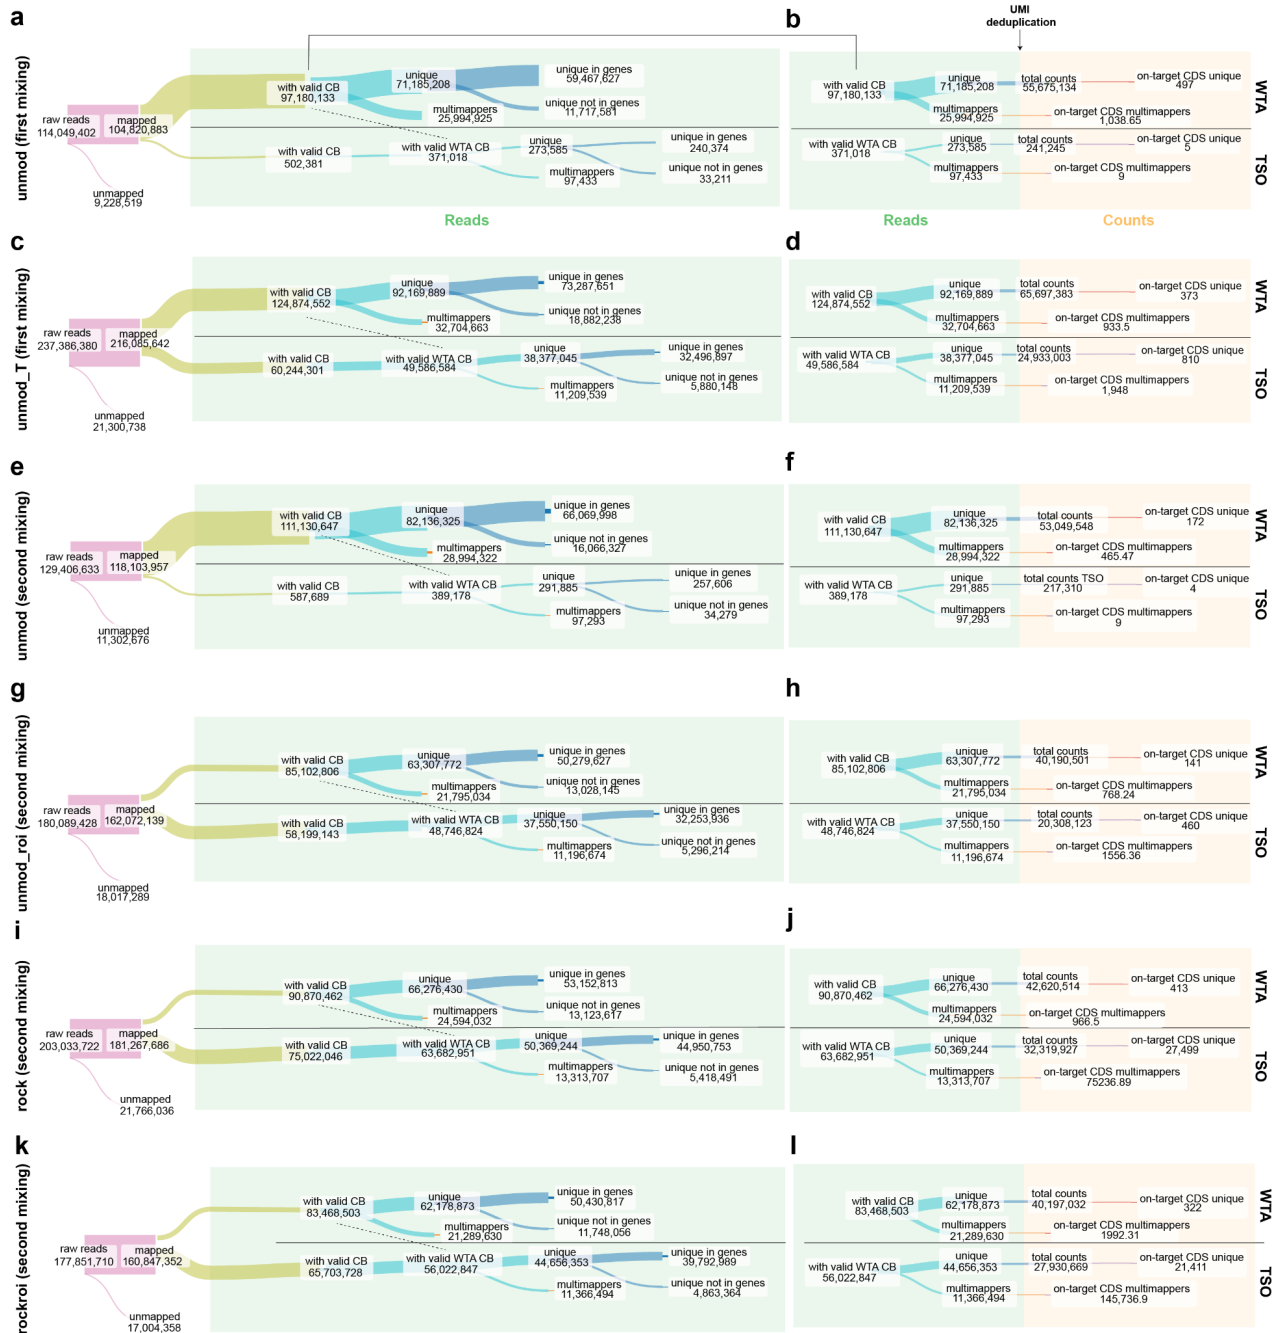

**Supp Figure 14: Flow of reads during RoCK and ROI scRNA-seq human and mouse mixing experiments**

**a-l**, Sankey plots depicting the WTA and TSO sequencing, alignment, UMI deduplication and cell barcode detection performance across conditions (mouse and human mixing experiments). Conditions: unmod (first mixing) and unmod\_T (first mixing) for experiment described in **Figure 2 (b) (panels a-d)**; unmod (second mixing), unmod\_roi (second mixing), rock (second mixing) and rockroi (second mixing) for experiment described in **Figure 3 (a) (panels e-l)**. Dashed line: filtering of TSO reads with non-empty cells with valid cell barcodes as detected in WTA data. Nodes: raw reads: number of reads from FASTQ files; mapped and unmapped: reads mapped to genome or not; with valid CB (WTA): WTA reads after EmptyDrop-filtering of cell barcodes (CB) from empty wells; with valid CB (TSO): TSO reads with a valid cell barcode structure; with valid WTA CB (TSO): TSO reads with cell barcodes matching WTA's EmptyDrops-filtered cells; unique and multimappers: uniquely and multimapping reads, respectively; unique in genes and unique not in genes: uniquely mapped reads overlapping genes or outside genes, respectively; total counts: total number of (gene) counts after UMI deduplication; on-target CDS unique and on-target CDS multimappers: number of *eGFP* and *tdTomato* counts in their CDS according to the multimapping status of the original read. Counts are 1/n transformed, n being the number of compatible loci (n=1 for unique reads). CDS: coding region.

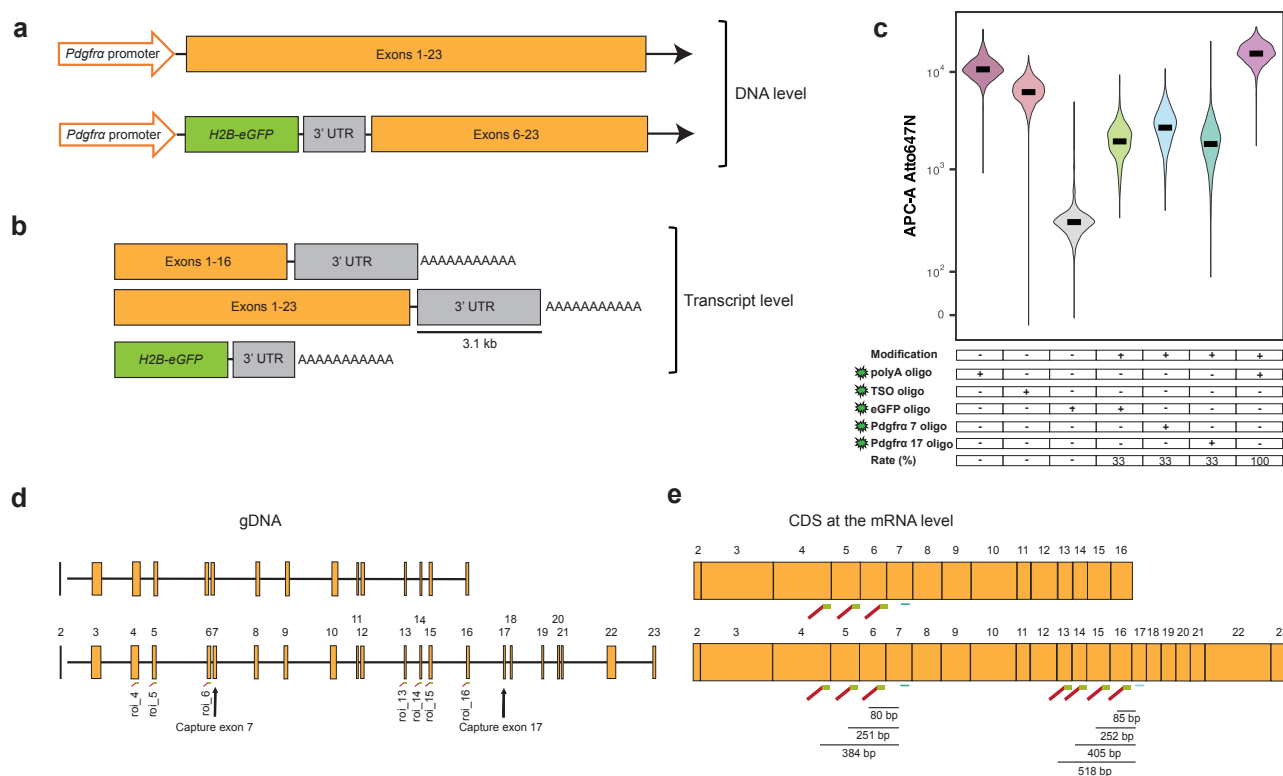

**Supp Figure 15: *Pdgfra* locus, capture, regions of interest and bead modification**

**a**, Structure of the *Pdgfra* locus in the transgenic mouse strain used for the scRNA-seq experiment. The mouse strain harbors a *Pdgfra* allele where the first four exons were substituted with an *H2B-eGFP* construct. **b**, Structure of the *Pdgfra*-derived transcripts from **(a)**. Top two diagrams: long and short *Pdgfra* isoforms, last diagram: transcript derived from *H2B-eGFP* transgenic allele. **c**, FACS signal from modification of beads for scRNA-seq experiment. Y-axis: Atto647N fluorescent signal. The Y-axis has a biexponential transformation. **d-e**, Exons targeted via RoCKseq captures and ROIseq primers for the short (top, ENSMUST00000202681.3 and ENSMUST00000201711.3) and long (bottom, ENSMUST00000000476.14 and ENSMUST00000168162.4) *Pdgfra* isoforms at the gDNA (**d**) and mRNA (**e**) levels.

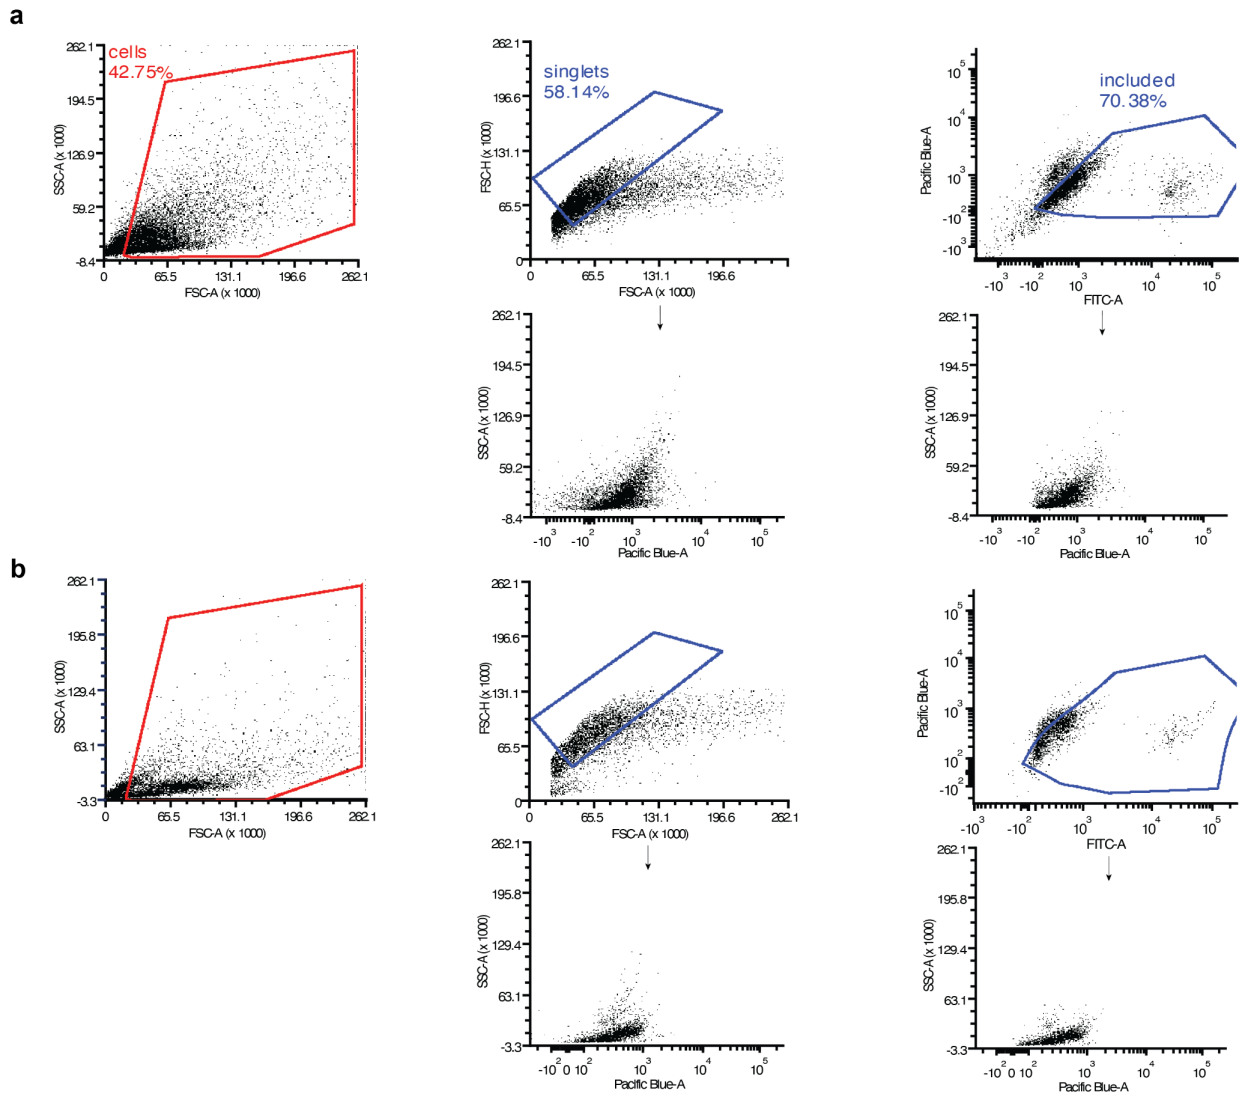

**Supp Figure 16: Cell gating for murine colonic cells**

**a**, FACS gating of the mesenchymal fraction. Gating of cells was done on forward scatter (FSC-A) versus side scatter (SSC-A) signal, while singlets were gated in FSC-A versus FSC-H signal. Live cells (included gate) were gated on FITC-A (signal from eGFP positive cells) versus Pacific Blue-A (viability signal). Bottom: additional plots (Pacific Blue-A for live cells versus SSC-A) showing gating for live cells (left: gated for singlets, right: gated for included). **b**, FACS analysis of negative control without viability staining. Gating of cells was done on FSC-A versus SSC-A signal, while singlets were gated in FSC-A versus FSC-H signal. Arrows connect plots that have the same gating but are represented in different channels.

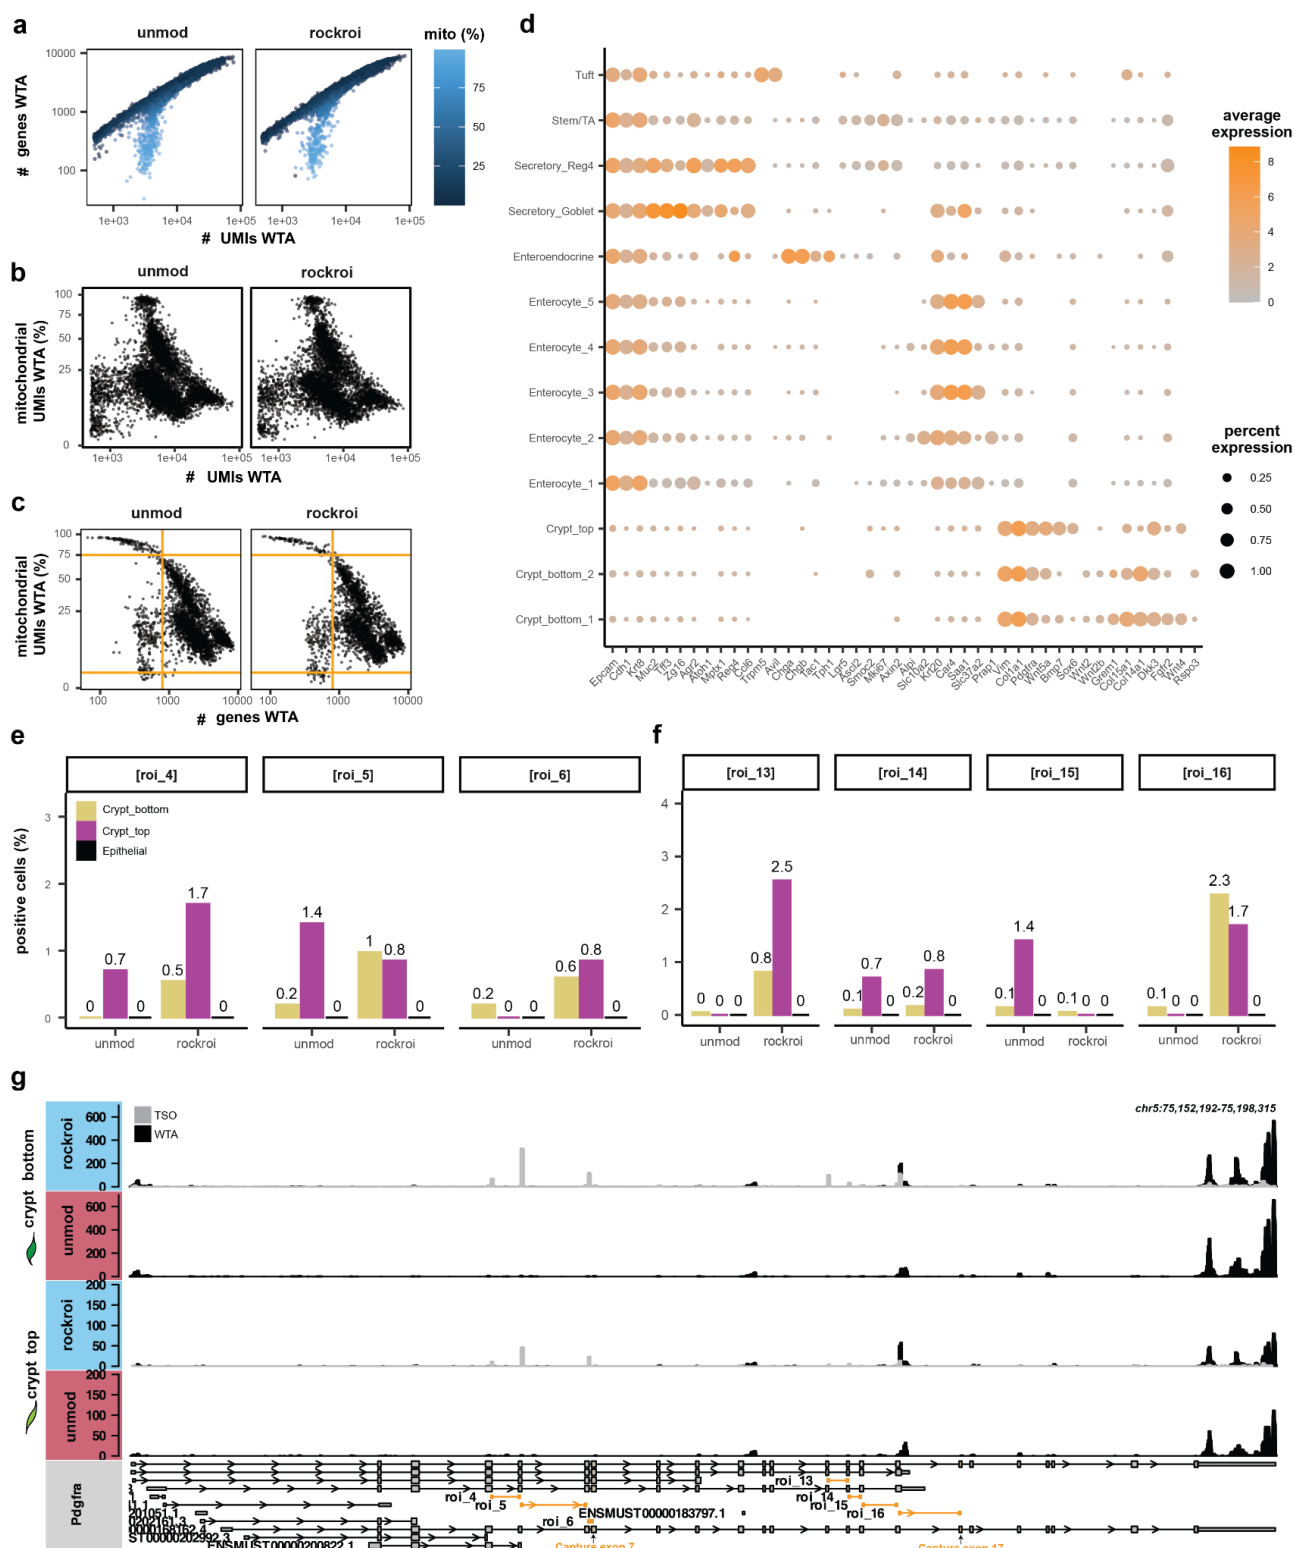

**Supp Figure 17: Quality control of *Pdgfra* scRNA-seq experiment, descriptive analysis and splicing quantification**

**a**, Number of genes versus number of UMIs colored by mitochondrial content, downsampled WTA data. **b**, Mitochondrial content versus number of UMIs, downsampled WTA data. **c**, Mitochondrial content versus number of genes. Orange lines: quality control (QC) filtering thresholds. **d**, Expression of manual cell type annotation markers across cell clusters. **e-f**, Percent positive cells in which at least one UMI spanning the splice junction targeted by ROIseq was detected on WTA data. **g**, Coverage along *Pdgfra* split by crypt top and crypt bottom fibroblasts for TSO (gray) and WTA (black) libraries.

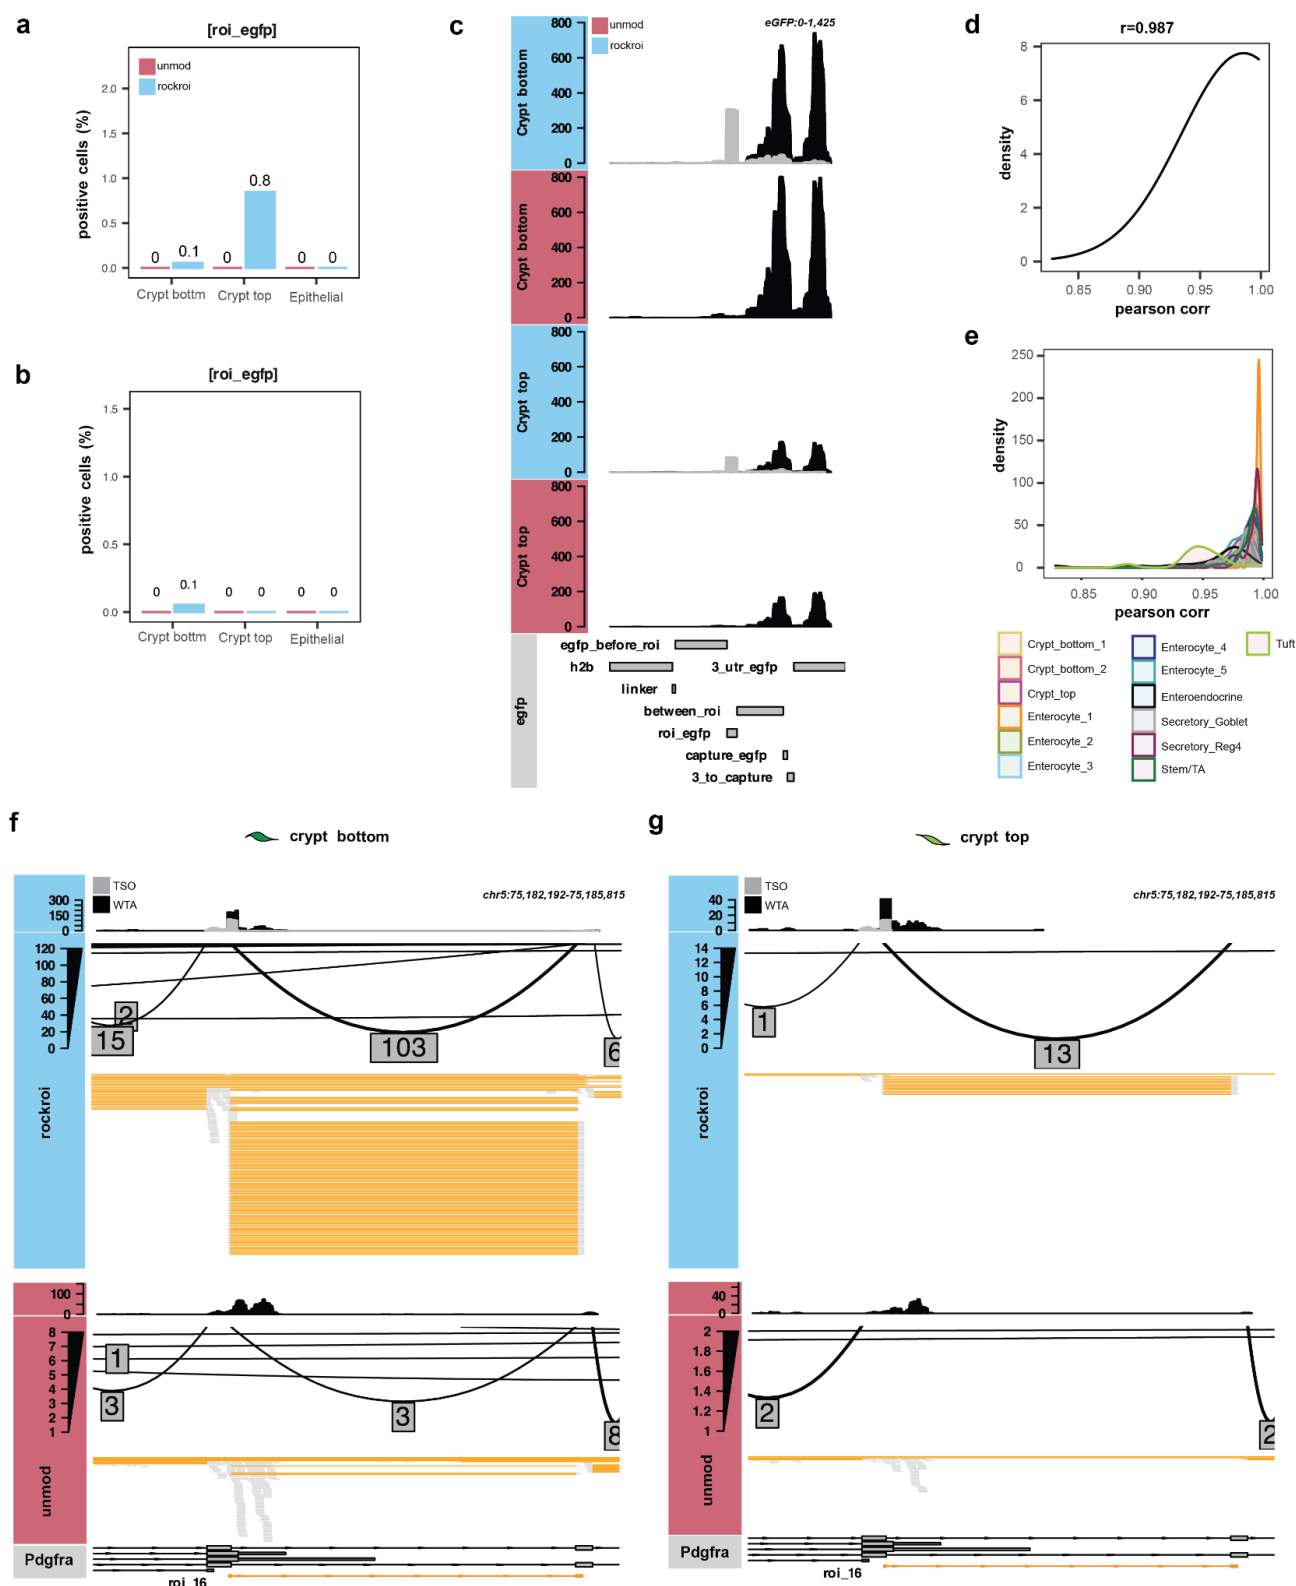

### Supp Figure 18: Detection of *Pdgfra* alternative splicing

**a-b**, Percent positive cells in which at least one UMI for the ROI<sup>eGFP</sup> (labelled as roi\_egfp in plot) was detected on TSO (**a**) or WTA data (**b**). **c**, Coverage along eGFP. **d-e**, Pearson correlation distributions between same barcodes in the unimodal and multimodal rockroi WTA data for all cells (**d**) or split by cell type (**e**). Correlations were calculated on 100 genes. **f-g**, Coverage, sashimi and alignment tracks for roi\_16 region in crypt bottom (**f**) or crypt top (**g**) fibroblasts. Boxed values indicate the number of alignments spanning splice junctions.

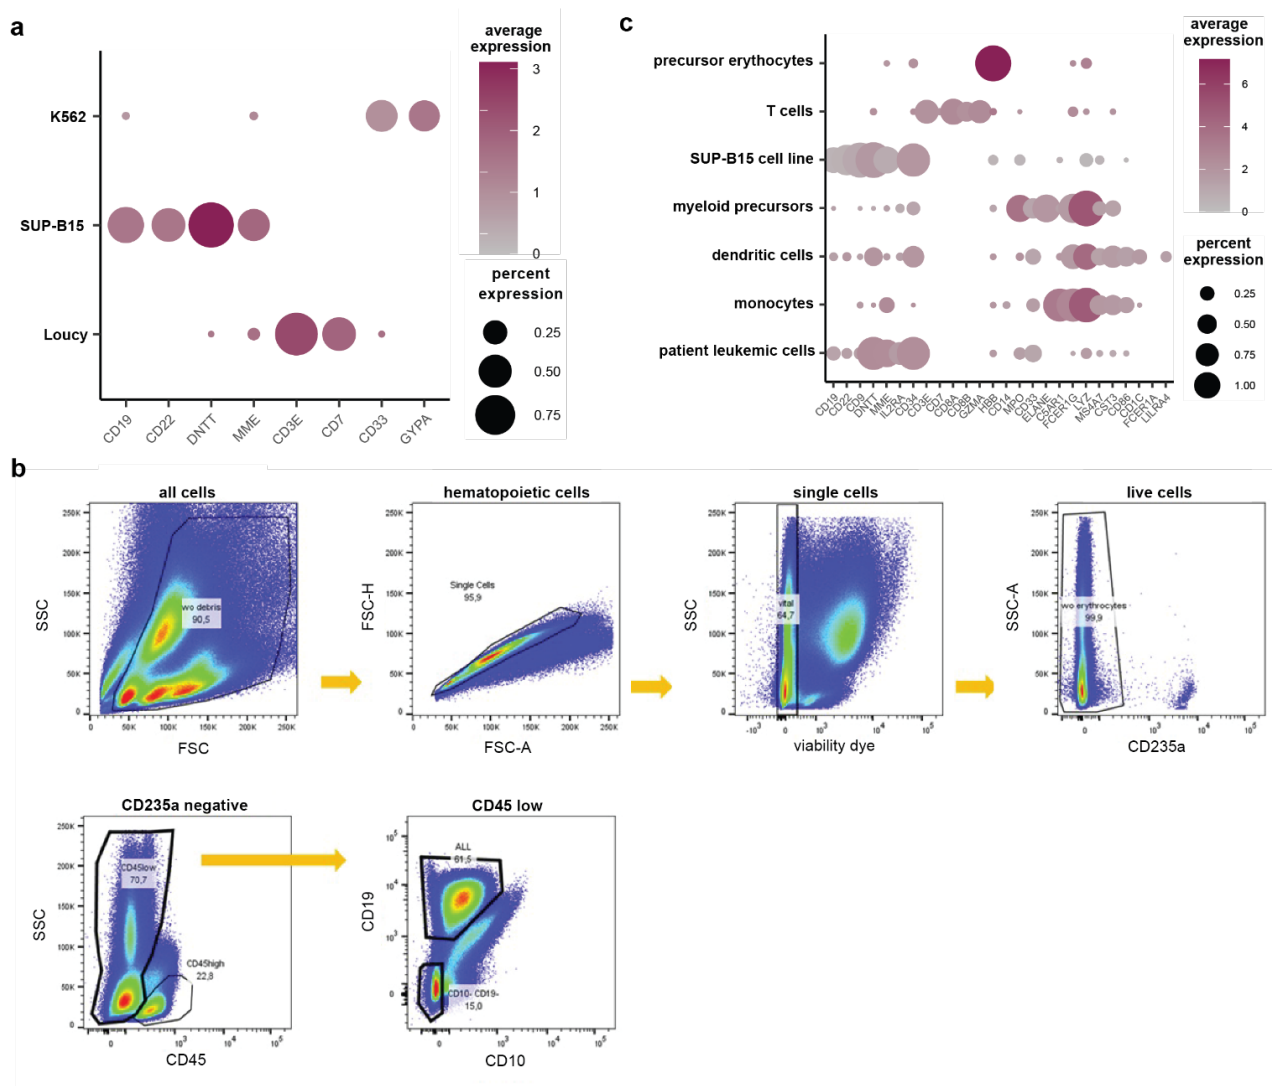

**Supp Figure 19: Detection of the *BCR::ABL1* fusion transcript in leukemia cells**

**a**, Expression of manual cell type annotation markers used for annotation of the cell line Uniform Manifold Approximation and Projection (UMAP) across cell clusters. **b**, Sorting strategy of patient sample for enrichment of non-leukemic compartment. Flow cytometry scheme used to sort non-leukemic compartment (CD235a-CD45lowCD19-CD10-) and B cell precursor cells/leukemic cells (CD235a-CD45lowCD19+) from human frozen bone marrow at primary diagnosis of BCP-ALL. **c**, Expression of manual cell type annotation markers used for annotation of patient and cell line UMAP across cell clusters.



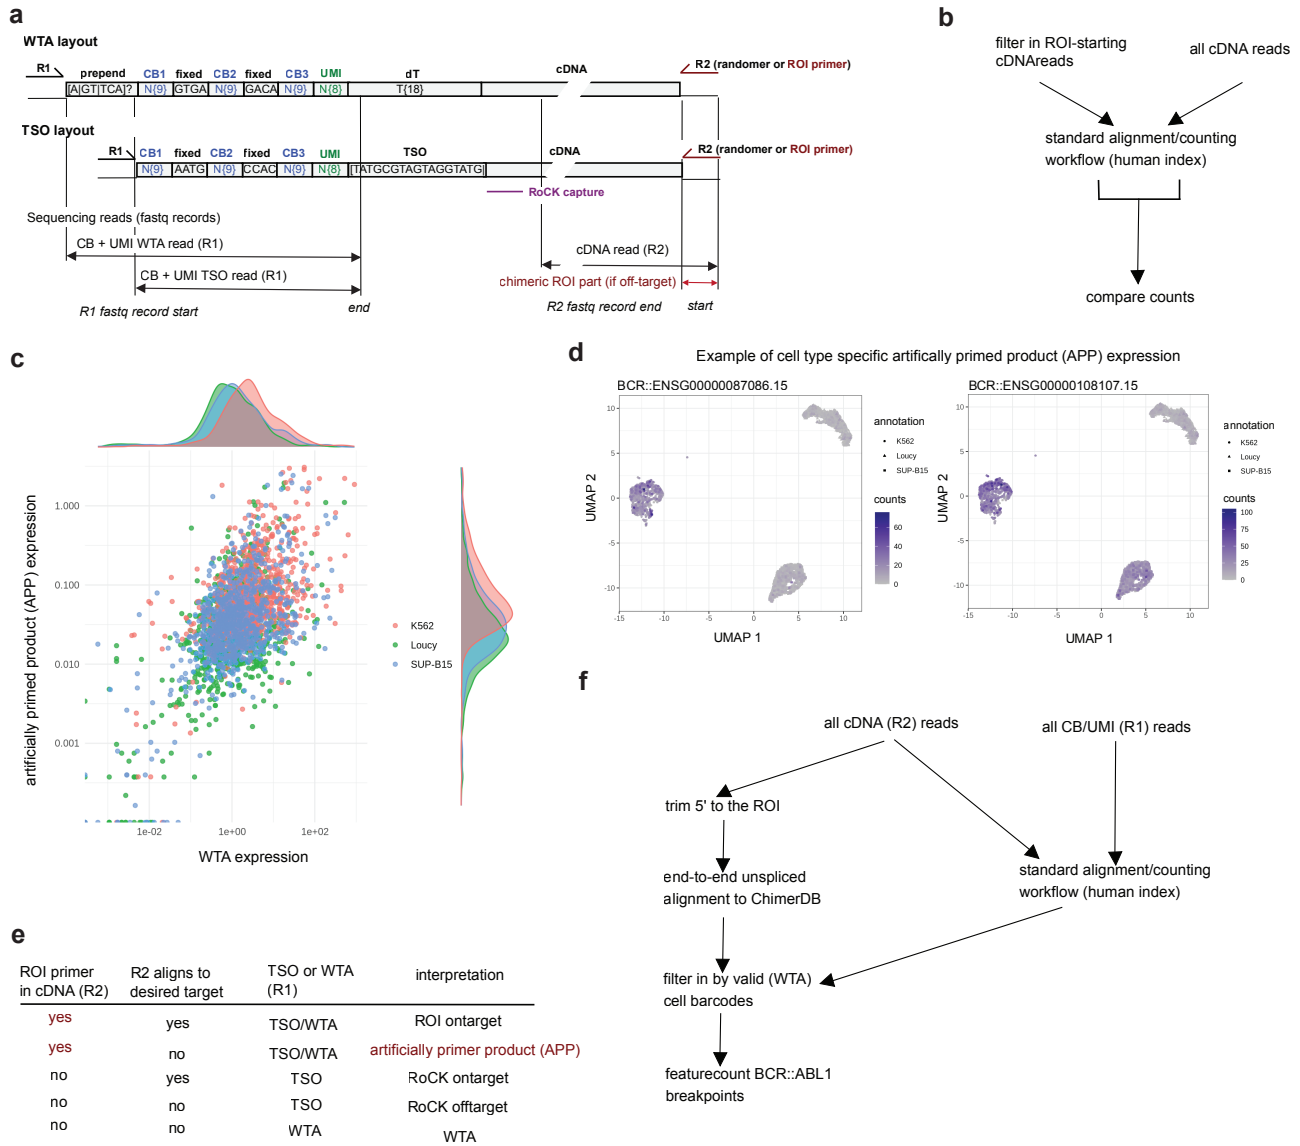

### Supp Figure 20: Analysis of artificially primed products (APPs)

**a**, BD Rhapsody tripartite cell barcode (CB, blue), UMI (green; Unique Molecular Identifiers) and cDNA layout, including RoCK (capture) and ROI (priming) locations, and potential APP cDNA read artifacts (chimeric ROI<sup>BCR</sup> sequence in red). **b**, Exploratory analysis of APPs abundance. **c**, BCR-containing APPs are pervasive using standard alignment (**b**), with read counts depending on the untargeted (WTa) gene expression level. Each dot depicts a ROI<sup>BCR</sup>::gene APP (e.g., for any gene, ABL1 or not) detection from a (leukemia) cell line. **d**, APPs can be cell line-specific, as showcased by ROI<sup>BCR</sup>::FTL (left) and ROI<sup>BCR</sup>::RPL278 (right) using the standard (**b**) quantification. **e**, Summary of the defining characteristics of RoCK and ROI off-targets and APPs. **f**, Custom workflow to quantify end-to-end BCR::ABL1 true gene fusions.



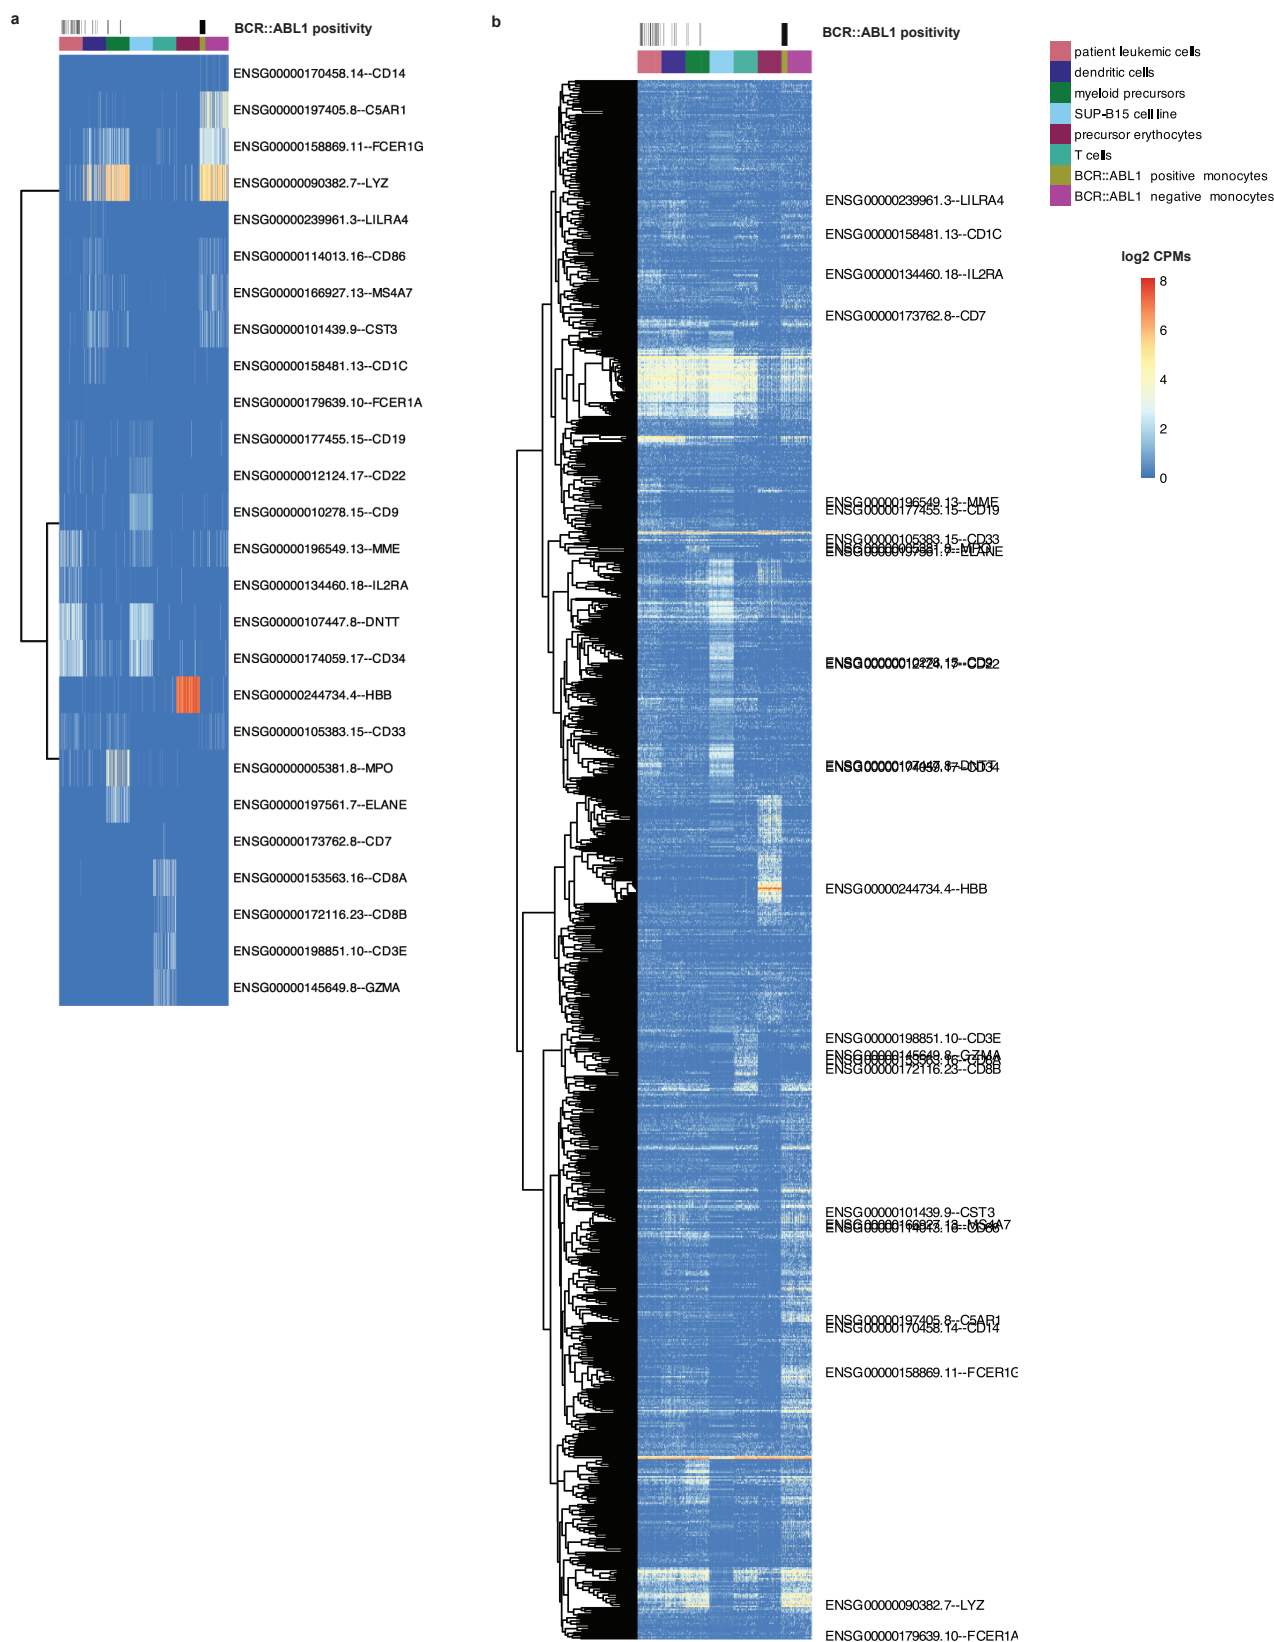

**Supp Figure 21: Comparison of *BCR::ABL1* positive and negative monocytes**

## Supplementary Tables

**Supp Table 1:** scRNA-seq experiments with relevant metrics including sequencing depth and number of cells before and after filtering. Table is also provided as Supplementary Data 1 for higher resolution.

**Supp Table 2:** Comparison of additional time needed for targeting and maximal number of cells which can be recovered from single scRNA-seq run.

**Supp Table 3:** Calculations to obtain read depth per cell.

**Supp Table 4:** Calculations to obtain cost per cell.

**Supp Table 5:** Additional targeting costs for ROCK and ROI scRNA-seq experiments.

**Supp Table 6:** Additional targeting costs for DART-seq scRNA-seq experiments.

**Supp Table 7:** Sensitivity of targeting.

**Supp Table 8:** Number of targets for each scRNA-seq method.

**Supp Table 9:** Detection of off-targets in scRNA-seq experiments.

**Supp Table 10:** Markers used for annotation of murine colonic cell clusters.

**Supp Table 11:** Primer sequences. Table is also provided as Supplementary Data 2 for higher resolution.

Supp Table 1: scRNA-seq experiments with relevant metrics including sequencing depth and number of cells before and after filtering.

| name_experiment                     | name_fastqs (R1 2)                           | SRX_identifier | conditions       | modalities | read_modification | number_of_R0seq_primes | number_of_reads_per_sample | number_of_cells_per_condition | unfiltered_number_of_cells_per_condition | after_OC_filtering_and_doublet_removal |
|-------------------------------------|----------------------------------------------|----------------|------------------|------------|-------------------|------------------------|----------------------------|-------------------------------|------------------------------------------|----------------------------------------|
| First cell line mixing experiment   | c307161_1-Unmodified_S4_R*_001.fastq.gz      | SRX28817193    | unmod            | WTA        | No                | 0                      | 114049402                  | 9768                          | 8587                                     |                                        |
| First cell line mixing experiment   | c307161_2-Unmodified_N1_S1_R*_001.fastq.gz   | SRX28817192    | unmod_T          | WTA / TSO  | No                | 0                      | 237386380                  | 10091                         | 7966                                     |                                        |
| Second cell line mixing experiment  | 315641_1-Unmod_S4_R*_001.fastq.gz            | SRX28330616    | unmod            | WTA        | No                | 0                      | 129406633                  | 8020                          | 6775                                     |                                        |
| Second cell line mixing experiment  | 315641_2-Unmod_ROI_S2_R*_001.fastq.gz        | SRX28330617    | unmod_roi        | WTA / TSO  | No                | 3                      | 180809428                  | 7070                          | 5724                                     |                                        |
| Second cell line mixing experiment  | 315641_3-RoCK_S1_R*_001.fastq.gz             | SRX28330618    | rocrk            | WTA / TSO  | No                | 0                      | 130303722                  | 7116                          | 5824                                     |                                        |
| Second cell line mixing experiment  | 315641_4-RoCK_ROI_S3_R*_001.fastq.gz         | SRX28330615    | unmod            | WTA / TSO  | Yes               | 3                      | 177851710                  | 7403                          | 5231                                     |                                        |
| Pdgfra epithelial mesenchymal cells | 325411_1-Unmod_WTA_S1_R*_001.fastq.gz        | SRX28330349    | unmod            | WTA        | No                | 0                      | 379666683                  | 5711                          | 4634                                     |                                        |
| Pdgfra epithelial mesenchymal cells | 325411_2-RoCK_ROI_WTA_S2_R*_001.fastq.gz     | SRX28330348    | rocrk_unimodal   | WTA        | Yes               | 8                      | 368399364                  | 4980                          | 4275                                     |                                        |
| Pdgfra epithelial mesenchymal cells | 325402_1-RoCK_ROI_WTA_S1_R*_001.fastq.gz     | SRX28330350    | rocrk_multimodal | WTA / TSO  | Yes               | 8                      | 665200527                  | 5079                          | 4097                                     |                                        |
| BCR-ABL1 fusion cell lines          | 331131_1-Cell_lines_50_50_S1_R*_001.fastq.gz | NA             | rocrk            | WTA / TSO  | Yes               | 2                      | 468258912                  | 6101                          | 5434                                     |                                        |
| BCR-ABL1 fusion patient sample      | 331131_2-Patient_S2_R*_001.fastq.gz          | NA             | rocrk            | WTA / TSO  | No                | 2                      | 383759722                  | 6475                          | 5675                                     |                                        |
| HeLa cells unmodified               | 384021_1-Unmod_1_S1_R*_001.fastq.gz          | SRX5030871     | unmod            | WTA        | No                | 0                      | 1109565519                 | 6114                          | 5034                                     |                                        |
| HeLa cells modified                 | 387722_1-RoCK_ROI_T_S2_R*_001.fastq.gz       | SRX5030870     | rocrk            | WTA / TSO  | Yes               | 7                      | 1139901915                 | 6307                          | 5429                                     |                                        |

**Supp Table 2: Comparison of additional time needed for targeting and maximal number of cells which can be recovered from single scRNA-seq run.**

Times are calculated based on protocol described in original publication. **NA:** no available.

|                                               | Standard protocol | Additional targeting time                                         | Maximal number cells |
|-----------------------------------------------|-------------------|-------------------------------------------------------------------|----------------------|
| <b>RoCK and ROI</b>                           | BD Rhapsody       | 2 hours                                                           | 40'000               |
| <b>DART-seq</b> <sup>2</sup>                  | DROP-seq          | 2 hours                                                           | 20'000               |
| <b>HyPR-seq</b> <sup>3</sup>                  | Custom            | Day 1: 2 h, overnight, day 2: 8h                                  | 30'000               |
| <b>TARGET-seq</b> <sup>4</sup>                | Custom            | total: 23 h                                                       | 384                  |
| <b>BART-seq</b> <sup>5</sup>                  | Custom            | Day 1: 6 h, overnight, day 2: 4 h<br>30 min                       | 3'000                |
| <b>GoT-seq</b> <sup>6</sup>                   | 10x               | 30 mins (GoT-seq)<br>2 x overnight, day 2/ 3; 6h (Circ<br>GoTseq) | 10'000               |
| <b>GoT-Splice</b> <sup>7</sup>                | 10x               | 6 h                                                               | 10'000               |
| <b>Chigene</b> <sup>8</sup>                   | Custom            | NA                                                                | 15'000               |
| <b>BD Targeted Amplification</b> <sup>9</sup> | BD Rhapsody       | 3 h 30 mins                                                       | 40'000               |
| <b>RAGE-seq</b> <sup>10</sup>                 | 10x               | Day 1: 2 h, 2x overnight, day<br>2/3: 4 h                         | 10'000               |
| <b>Van Horebeek et al.</b> <sup>11</sup>      | 10x               | 1 h 30 mins                                                       | 10'000               |
| <b>Constellation-seq</b> <sup>12</sup>        | DROP-seq<br>10x   | 40 mins (DROP-seq)<br>2 h (10x)                                   | 10'000               |
| <b>scTalLoR-seq</b> <sup>13</sup>             | 10x               | Day 1: 2 h, overnight, day 2: 3 h                                 | 10'000               |
| <b>scTLR-seq</b> <sup>14</sup>                | 10x               | 3 h 30 mins                                                       | 10'000               |
| <b>scCapture-seq</b> <sup>15</sup>            | Multiple          | 3 days incubation + 2 h                                           | 384                  |

**Supp Table 3: Calculations to obtain read depth per cell.**

# reads per experiment: M: millions. average reported for separate experiments if values for each experiment differ largely.  
# cells: number of recovered cells after sequencing. Exp: experiment. ONT: Oxford Nanopore Technology. ^a: value reported by study. If not specified value extrapolated from deposited data. NA: values not reported in table, either because data not available or because the read depth per cell was directly reported in the study. R1: read 1, R2: read 2. Reads needed to obtain information on index are not reported. \*: values are based on averages reported in Dataset S02 (excluding information on 10x libraries). \*\* values are based on the pluripotency experiment (GSE130422). \*\*\* values are based on P1 and P2 experiments for targeted experiments (Table 1).

|                                               | # reads /<br>experiment (M)                                  | Sequencing machine                                                                                                                                                                | Read set up                                                                                              | # cells                                                                                | Read depth<br>cell                                                                               |
|-----------------------------------------------|--------------------------------------------------------------|-----------------------------------------------------------------------------------------------------------------------------------------------------------------------------------|----------------------------------------------------------------------------------------------------------|----------------------------------------------------------------------------------------|--------------------------------------------------------------------------------------------------|
| <b>RoCK and ROI</b>                           | 272                                                          | Illumina NovaSeq 6000 <sup>a</sup>                                                                                                                                                | R1=60, R2=62                                                                                             | 7'500                                                                                  | 36'000                                                                                           |
| <b>DART-seq</b> <sup>2</sup>                  | <u>Exp 1: 30</u><br><u>Exp 2: 680</u>                        | Illumina NextSeq 500 <sup>ab</sup>                                                                                                                                                | R1=20, R2=130-131                                                                                        | 1'000 <sup>ab</sup>                                                                    | <u>Exp 1: 30'000</u><br><u>Exp 2: 680'000</u>                                                    |
| <b>HyPR-seq</b> <sup>3,*</sup>                | 50                                                           | Illumina NextSeq 550 <sup>ab</sup>                                                                                                                                                | R1=40-43, R2=12                                                                                          | 2'532 <sup>ab</sup>                                                                    | 19'747                                                                                           |
| <b>TARGET-seq</b> <sup>4</sup>                | NA                                                           | Illumina NextSeq 500/550 <sup>ab</sup>                                                                                                                                            | <u>Full-length:</u><br>R1=75, R2=75 <sup>ab</sup><br><u>3' - biased:</u><br>R1=28, R2=64 <sup>ab</sup>   | <u>Full-length:</u><br>458 <sup>ab</sup><br><u>3' - biased:</u><br>2'798 <sup>ab</sup> | <u>Full-length:</u><br>2.4 M <sup>ab</sup><br><u>3' - biased:</u><br>152,552 reads <sup>ab</sup> |
| <b>BART-seq</b> <sup>5,**</sup>               | 23.5                                                         | Illumina Miseq <sup>ab</sup>                                                                                                                                                      | R1=128, R2=132                                                                                           | 4'500 <sup>ab</sup>                                                                    | 5'200                                                                                            |
| <b>GoT-seq</b> <sup>6</sup>                   | <u>GoT: 40</u><br><u>Circularization</u><br><u>GoT: 0.35</u> | <u>GoT: Illumina HiSeq 2500 / Illumina MiSeq</u> <sup>ab</sup><br><u>Circularization GoT: Illumina MiSeq</u> <sup>ab</sup><br><u>Long-read: Nanopore GridION X5</u> <sup>ab</sup> | <u>GoT: R1=26/28, R2=98/130</u> <sup>ab</sup><br><u>Circularization GoT: R1=150 R2=150</u> <sup>ab</sup> | 10'000 <sup>ab</sup>                                                                   | <u>GoT: 4'000</u><br><u>Circularization</u><br><u>GoT: 35</u>                                    |
| <b>GoT-Splice</b> <sup>7</sup>                | NA                                                           | Nanopore PromethION ,<br>GridION / MinION <sup>ab</sup>                                                                                                                           | Long-read                                                                                                | 10'000 <sup>ab</sup>                                                                   | NA                                                                                               |
| <b>Chigene</b> <sup>8</sup>                   | NA                                                           | MGI-T7 <sup>ab</sup>                                                                                                                                                              | R1=150, R2=150 <sup>ab</sup>                                                                             | NA                                                                                     | NA                                                                                               |
| <b>BD Targeted Amplification</b> <sup>9</sup> | 40                                                           | Illumina HiSeq 2500 <sup>ab</sup>                                                                                                                                                 | R1=150, R2=150 <sup>ab</sup>                                                                             | 8'000 <sup>ab</sup>                                                                    | 2,165 /<br>14,042 <sup>ab</sup>                                                                  |
| <b>RAGE-seq</b> <sup>10</sup>                 | ONT: 20<br>10x: 312                                          | ONT: Nanopore<br>MIN106 <sup>ab</sup><br>10x: Illumina NextSeq 500 <sup>ab</sup>                                                                                                  | 10x: R1=150, R2=150 <sup>ab</sup>                                                                        | 5'000 <sup>ab</sup>                                                                    | ONT: 4'000<br>10x: 60'000 <sup>ab</sup>                                                          |
| <b>Van Horebeek et al.</b> <sup>11,***</sup>  | 0.5 M <sup>ab</sup><br>(based on P1 and P2)                  | Illumina NextSeq500 /<br>Illumina MiSeq <sup>ab</sup>                                                                                                                             | R1=28, R2=150 <sup>ab</sup>                                                                              | 3'000 <sup>ab</sup>                                                                    | 170                                                                                              |
| <b>Constellation-seq</b> <sup>12</sup>        | NA                                                           | Illumina Nextseq500 <sup>ab</sup>                                                                                                                                                 | 10x: R1= 28, R2=60 <sup>ab</sup><br>DROPseq: R1=20, R2=50 <sup>ab</sup>                                  | 10x: 1'000 <sup>ab</sup><br>DROPseq:<br>6'000 <sup>ab</sup>                            | 10x: 1'500 <sup>ab</sup><br>DROPseq:<br>20'000 <sup>ab</sup>                                     |
| <b>scTalLoR-seq</b> <sup>13</sup>             | <u>Exp 1: 70</u><br><u>Exp 2: 340</u>                        | <u>Exp 1: Nanopore MinION</u> <sup>ab</sup> , <u>Exp 2: Nanopore PromethION</u> <sup>ai</sup>                                                                                     | Long-read                                                                                                | 10'000 <sup>ab</sup>                                                                   | <u>Exp 1: 7'000</u><br><u>Exp 2: 34'000</u>                                                      |
| <b>scTLR-seq</b> <sup>14</sup>                | NA                                                           | Nanopore GridION                                                                                                                                                                  | Long-read                                                                                                | 10'000 <sup>ab</sup>                                                                   | NA                                                                                               |
| <b>scCapture-seq</b> <sup>15</sup>            | 1 per cell <sup>ab</sup>                                     | Illumina HiSeq 4000                                                                                                                                                               | R1=75, R2=75 <sup>ab</sup>                                                                               | 1'000 <sup>ab</sup>                                                                    | 1'000'000                                                                                        |

#### Supp Table 4: Calculations to obtain cost per cell.

Cost per cell is calculated on values reported by studies. The cost for RoCK and ROI and DART-seq experiments were calculated in detail (Supp Table 4 and 5). *Sequencing cost*: cost needed to sequence libraries to a similar read depth reported in Supp Table 2. Costs are based on values from the FGCZ sequencing facility in Zurich, Switzerland. *# cells*: number of cells used for calculations. Numbers are based on maximal amount of cells which can be loaded. *Standard library cost*: cost to generate standard library. The cost is based on Zhang, et al., 2019<sup>16</sup> and Gao et al., 2020<sup>17</sup> and does not include the instrument cost. Costs are not calculated for custom platforms. *Targeting cost*: additional cost which is needed for targeting step of protocol. <sup>a</sup>: value reported by paper. *NA*: data not available. \* Sequencing costs for RoCK and ROI, TARGET-seq, GoT-seq and GoT-Splice are higher as more than one library needs to be sequenced to obtain information on the targets and transcriptome. \*\* Cost (in CHF) based on online quote for following kits (divided by 4 since they are for four kits): Onco-BC panel (633752): 326.00, Targeted mRNA and AbSeq Amplification Kit (633774): 1,620.00. \*\*\* Conversion AUD to CHF: conversion 1 AUD to 0.57 CHF. \*\*\*\* Conversion pounds to CHF: 1 pound to 1.11 CHF. \*\*\*\*\* Conversion USD to CHF: 1 USD to 0.87 CHF.

|                                                 | Sequencing cost (CHF) | # cells | Standard library cost (CHF) | Targeting cost (CHF)                                       | Total cost (CHF)              | Cost per cell (CHF)         |
|-------------------------------------------------|-----------------------|---------|-----------------------------|------------------------------------------------------------|-------------------------------|-----------------------------|
| <b>RoCK and ROI *</b>                           | 2'000                 | 10'000  | BD: 1400                    | 333.25                                                     | 3'733                         | 0.37                        |
| <b>DART-seq <sup>2</sup></b>                    | 1'000                 | 10'000  | DROP-seq: 700               | 44                                                         | 1'744                         | 0.17                        |
| <b>HyPR-seq<sup>3</sup></b>                     | 1'000                 | 10'000  | Custom                      | NA                                                         | NA                            | NA                          |
| <b>TARGET-seq<sup>4,*</sup></b>                 | 2'000                 | 1'000   | Custom                      | NA                                                         | NA                            | NA                          |
| <b>BART-seq<sup>5,*****</sup></b>               | 1'000                 | 10'000  | Custom                      | NA                                                         | NA                            | 0.87 <sup>a</sup>           |
| <b>GoT-seq<sup>6,*</sup></b>                    | 2'000 + 1'000<br>ONT  | 10'000  | 10x: 1600                   | NA                                                         | NA                            | NA                          |
| <b>GoT-Splice<sup>7,*</sup></b>                 | 2'000 + 1'000<br>ONT  | 10'000  | 10x: 1600                   | NA                                                         | NA                            | NA                          |
| <b>Chigene<sup>8</sup></b>                      | NA                    | NA      | Custom                      | NA                                                         | NA                            | NA                          |
| <b>BD Targeted Amplification<sup>9,**</sup></b> | 1'000                 | 10'000  | BD: 1400                    | 486.50                                                     | 2886.50                       | 0.29                        |
| <b>RAGE-seq<sup>10,***</sup></b>                | 1'000 + 7'000<br>ONT  | 10'000  | 10x: 1600                   | 761.22 <sup>a</sup>                                        | 7761.22                       | 0.88                        |
| <b>Van Horebeek et al.<sup>11</sup></b>         | 1'000                 | 10'000  | 10x: 1600                   | NA                                                         | NA                            | NA                          |
| <b>Constellation-seq<sup>12,****</sup></b>      | 1'000                 | 10'000  | DROPseq: 700<br>10x: 1600   | DROP-seq: 221.08 <sup>a</sup> ,<br>10x: 55.27 <sup>a</sup> | DROP-seq: 1'921<br>10x: 2'655 | DROP-seq: 0.19<br>10x: 0.27 |
| <b>scTalLoR-seq<sup>13</sup></b>                | 1'000 + 6'500<br>ONT  | 10'000  | 10x: 1600                   | NA                                                         | NA                            | NA                          |
| <b>scTLR-seq<sup>14</sup></b>                   | 1'000 + 1'000<br>ONT  | 10'000  | 10x: 1600                   | NA                                                         | NA                            | NA                          |
| <b>scCapture-seq<sup>15</sup></b>               | 1'000                 | 1'000   | Multiple                    | NA                                                         | NA                            | NA                          |

**Supp Table 5: Additional targeting costs for ROCK and ROI scRNA-seq experiments.**

The costs include bead modification, fluorescent assay and scRNA-seq experiment. Costs are calculated based on prices obtained in Switzerland. Cost of splints are based on quotes from Microsynth AG. *Number of samples*: number of full bead vials which can be modified with ordered product.

| Reagent                                                      | Product number | Number of samples | Cost (CHF) | Cost per sample (CHF) |
|--------------------------------------------------------------|----------------|-------------------|------------|-----------------------|
| T4 polymerase                                                | EP0062         | 1                 | 210.65     | 210.65                |
| Lambda exonuclease                                           | M0262          | 2                 | 112.60     | 56.30                 |
| Tris, pH 8.0                                                 | AM9855G        | 200               | 91.65      | 0.45                  |
| EDTA, pH 8.0                                                 | AM9260G        | 1'000             | 98.65      | 0.1                   |
| Tween20                                                      | 13464259       | 25'000            | 40.32      | <0.1                  |
| dNTPs (10 mM)                                                | 41106305       | 3                 | 164        | 54.70                 |
| DNAse / RNAse free ddH <sub>2</sub> O                        | 10977015       | 125               | 42         | 0.30                  |
| Splint                                                       |                | 10                | 80         | 8                     |
| Fluorescent oligos (cost for positive and negative controls) |                | 80                | 165        | 2                     |
| ROIseq primer (1 primer)                                     |                | 1500              | 50         | <0.1                  |
| Indexing primer                                              |                | 95                | 72         | 0.75                  |
| Sequencing primer                                            |                | 700               | 50         | <0.1                  |
| Total for 1 sample: 333.25 CHF                               |                |                   |            |                       |

**Supp Table 6: Additional targeting costs for DART-seq scRNA-seq experiments.**

The costs include bead modification, fluorescent assay and scRNA-seq experiment. Costs are calculated based on prices obtained in Switzerland. Cost of splints are based on quotes from Microsynth AG. *Number of samples*: number of full bead vials which can be modified with ordered product.

| Reagent                                                         | Product number | Number of samples            | Cost (CHF) | Cost per sample (CHF) |
|-----------------------------------------------------------------|----------------|------------------------------|------------|-----------------------|
| T4 DNA Ligase                                                   | EL0013         | 18                           | 300.65     | 16.70                 |
| ddH2O                                                           | 10977015       | 125                          | 42         | 0.30                  |
| 0.5 M EDTA                                                      | BDH7830-1      | 1'000                        | 200        | 0.2                   |
| Tris pH 7.5                                                     | 15567027       | 200                          | 86.65      | 0.43                  |
| 10% SDS solution                                                | AM9823         | 400                          | 385.00     | 0.96                  |
| Tween20                                                         | 85115          | 2500                         | 1'168.00   | 0.46                  |
| Oligo 1 (splint 1)                                              |                | 3 (based on 500 uL of probe) | 65.18      | 21.72                 |
| Oligo 2 (splint 1)                                              |                | 3 (based on 500 uL of probe) | 36.28      | 1.20                  |
| Fluorescent oligos<br>(cost for positive and negative controls) |                | 80                           | 165        | 2                     |
| T4 DNA Ligase                                                   |                | 18                           | 300.65     | 16.70                 |
| ddH2O                                                           |                | 125                          | 42         | 0.30                  |
| 0.5 M EDTA                                                      |                | 1'000                        | 200        | 0.2                   |
| Total for 1 sample: 44 CHF                                      |                |                              |            |                       |



### Supp Table 7: Sensitivity of targeting.

Values are extrapolated from reports in study. *positive cells unmodified (%)*: percent of positive cells detected in the unmodified sample (when applicable). *positive cells targeted (%)*: percent of positive cells detected in targeted sample. *Increase in positive cells with targeting*: average difference in percentage positive cells between targeted and unmodified sample. *Fold change on-target*: increase in detection of target compared to unmodified sample (when applicable). <sup>a</sup>: values extrapolated from results in paper. NA: data not available. \* values calculated based on average in Supplemental Table 2. \*\* calculations based on P1 and P2 in Table 2. Additional comments on Supp Table 6: **RoCKseq**: values are average for cell line experiment compared to unmodified sample; **RoCK and ROI**: values are average for cell line experiment compared to unmodified sample; **DART-seq**: fold change based on coverage. Values based on two separate experiments (fold change of on-target: cell line experiment / percent positive cells: PBMCs); **HyPR-seq**: fold change compared to 3' 10x. Range depends on targeted gene; **TARGET-seq**: based on detection of detection of 4 mutations in same cell. **BART-seq**: no comparison to other methods (no data); **GoT-Splice**: numbers relate to two different experiments. Fold change of on-target relates to the detection of junctions using long-read sequencing (90% reads were unique to long-read data); **Chigene**: no comparison to other methods. Capture percentages extracted from Figure 3k; **BD Targeted Amplification**: comparison to 10x data; **RAGE-seq**: comparison to untargeted data. Average percentage positive cells are calculated separately for three separate experiments; **scTLR-seq**: no unmodified sample to compare to.

|                                                 | positive cells<br>unmodified<br>(%)        | positive cells targeted<br>(%)              | Increase in positive cell:<br>with targeting<br>(%) | Fold change<br>on-target |
|-------------------------------------------------|--------------------------------------------|---------------------------------------------|-----------------------------------------------------|--------------------------|
| <b>RoCKseq</b>                                  | 6.4                                        | 98.50                                       | 92.02                                               | 379.7                    |
| <b>RoCK and ROI</b>                             | 6.4                                        | 99.47                                       | 95.39                                               | 4345.7                   |
| <b>DART-seq</b> <sup>2</sup>                    | 3                                          | 29                                          | 26                                                  | 430                      |
| <b>HyPR-seq</b> <sup>3</sup>                    | NA                                         | 90                                          | NA                                                  | 30-300                   |
| <b>TARGET-seq</b> <sup>4</sup>                  | 0                                          | 38.9                                        | 38.9                                                | NA                       |
| <b>BART-seq</b> <sup>5</sup>                    | NA                                         | NA                                          | NA                                                  | NA                       |
| <b>GoT-seq</b> <sup>6</sup>                     | GoTseq: 1.4,<br>Circularization GoT-seq: 5 | GoTseq: 88.7<br>Circularization GoT-seq: 24 | GoTseq: 87.3<br>Circularization GoT-seq: 15         | NA                       |
| <b>GoT-Splice</b> <sup>7</sup>                  | 3                                          | 56                                          | 53%                                                 | 12.3                     |
| <b>Chigene</b> <sup>8</sup>                     | NA                                         | 92.77                                       | NA                                                  | NA                       |
| <b>BD Targeted Amplification</b> <sup>9,*</sup> | NA                                         | NA                                          | NA                                                  | 15.84 <sup>a</sup>       |
| <b>RAGE-seq</b> <sup>10</sup>                   | NA                                         | 50.3 / 58.9 / 61.9                          | NA                                                  | 13                       |
| <b>Van Horebeek et al.</b> <sup>11,**</sup>     | 3.22                                       | 96.68                                       | 93.46                                               | 103                      |
| <b>Constellation-seq</b> <sup>12</sup>          | NA                                         | NA                                          | NA                                                  | 83                       |
| <b>scTalLoR-seq</b> <sup>13</sup>               | NA                                         | NA                                          | NA                                                  | 29                       |
| <b>scTLR-seq</b> <sup>14</sup>                  | NA                                         | NA                                          | NA                                                  | NA                       |
| <b>scCapture-seq</b> <sup>15</sup>              | NA                                         | NA                                          | NA                                                  | 36                       |

**Supp Table 8: Number of targets for each scRNA-seq method.**

*# targeting elements*: number of primers, probes or capture sequences used per experiment. Elements for different experiments are separated by a dash (" / "), while different types of targeting elements are split by an "&". *# transcripts targeted*: number of different targeted transcripts. *NA*: data not available

|                                               | # targeting elements | Type of targeting element                   | # transcripts targeted |
|-----------------------------------------------|----------------------|---------------------------------------------|------------------------|
| <b>RoCK and ROI</b>                           | 1 / 3 & 3 / 8        | Capture sequences on beads & ROIseq primers | 2 / 2                  |
| <b>DART-seq</b> <sup>2</sup>                  | 6 / 1                | Capture sequences on beads                  | 1 / 1                  |
| <b>HyPR-seq</b> <sup>3</sup>                  | 102 / 265 / 1,023    | Probes                                      | 22 / 48 / 179          |
| <b>TARGET-seq</b> <sup>4</sup>                | 12                   | PCR primers                                 | 12                     |
| <b>BART-seq</b> <sup>5</sup>                  | 15                   | Specific primers                            | 15                     |
| <b>GoT-seq</b> <sup>6</sup>                   | 5                    | Specific primer                             | 5                      |
| <b>GoT-Splice</b> <sup>7</sup>                | 2 & 4                | Specific primer & PCR primers               | 2                      |
| <b>Chigene</b> <sup>8</sup>                   | NA                   | NA                                          | NA                     |
| <b>BD Targeted Amplification</b> <sup>9</sup> | 492                  | PCR primers                                 | 492                    |
| <b>RAGE-seq</b> <sup>10</sup>                 | 644                  | Probes                                      | 25                     |
| <b>Van Horebeek et al.</b> <sup>11</sup>      | 1                    | PCR primers                                 | 1                      |
| <b>Constellation-seq</b> <sup>12</sup>        | 20 / 52 / 127        | Linear amplification primer                 | 20 / 52 / 127          |
| <b>scTalLoR-seq</b> <sup>13</sup>             | NA                   | Specific primers                            | NA                     |
| <b>scTLR-seq</b> <sup>14</sup>                | 1                    | Custom primer                               | 1                      |
| <b>scCapture-seq</b> <sup>15</sup>            | 972                  | Specific primer                             | 972                    |

**Supp Table 9: Detection of off-targets in scRNA-seq experiments.**

NA: data not available.

| Name                                   | Can off-targets be determined? | Are off-targets reported? | Additional comments                                                                                       |
|----------------------------------------|--------------------------------|---------------------------|-----------------------------------------------------------------------------------------------------------|
| RoCK and ROI                           | yes                            | yes                       |                                                                                                           |
| DART-seq <sup>2</sup>                  | no                             | no                        | Not possible as captured transcripts from modified and unmodified transcripts will be in the same library |
| HyPR-seq <sup>3</sup>                  | yes                            | no                        | The probes are gene-specific, off-target are the detection of other genes when using specific primers     |
| TARGET-seq <sup>4</sup>                | yes                            | no                        | The primers are gene-specific, off-targets are the detection of other genes when using specific primers   |
| BART-seq <sup>5</sup>                  | yes                            | no                        | The primers are gene-specific, off-targets are the detection of other genes when using specific primers   |
| GoT-seq <sup>6</sup>                   | yes                            | no                        | The targeted library is sequenced separately or indexed with a separate RPI primer                        |
| GoT-Splice <sup>7</sup>                | yes                            | no                        | The targeted library is sequenced separately or indexed with a separate RPI primer                        |
| Chigene <sup>8</sup>                   | NA                             | no                        | Not enough information available to determine                                                             |
| BD Targeted Amplification <sup>9</sup> | yes                            | no                        | The targeted information is obtained in a separate library                                                |
| RAGE-seq <sup>10</sup>                 | yes                            | no                        | The targeted information is obtained in a separate library                                                |
| Van Horebeek et al. <sup>11</sup>      | yes                            | no                        | The targeted information is obtained in a separate library                                                |
| Constellation-seq <sup>12</sup>        | yes                            | yes                       | The targeted information is obtained in a separate library                                                |
| scTalLoR-seq <sup>13</sup>             | yes                            | no                        | The targeted information is obtained in a separate library                                                |
| scTLR-seq <sup>14</sup>                | yes                            | no                        | The targeted library is sequenced separately                                                              |
| scCapture-seq <sup>15</sup>            | yes                            | no                        | The probes are gene-specific, off-target are the detection of other genes when using specific primers     |

**Supp Table 10: Markers used for annotation of murine colonic cell clusters**

| <b>Broad_cell_type</b> | <b>Cell_type</b>                                    | <b>Marker</b>                   |
|------------------------|-----------------------------------------------------|---------------------------------|
| Epithelial             | Epithelial                                          | ENSMUSG000000045394.9__Epcam    |
| Epithelial             | Epithelial                                          | ENSMUSG00000000303.12__Cdh1     |
| Epithelial             | Epithelial                                          | ENSMUSG000000049382.10__Krt8    |
| Epithelial             | Secretory_cells_Goblet_Reg4                         | ENSMUSG000000025515.15__Muc2    |
| Epithelial             | Secretory_cells_Goblet_Reg4                         | ENSMUSG000000024029.4__Tff3     |
| Epithelial             | Secretory_cells_Goblet                              | ENSMUSG000000049350.6__Zg16     |
| Epithelial             | Secretory_cells_Goblet_Reg4                         | ENSMUSG000000020581.11__Agr2    |
| Epithelial             | Secretory_cells_Reg4                                | ENSMUSG000000073043.5__Atoh1    |
| Epithelial             | Secretory_cells_Reg4                                | ENSMUSG000000026531.4__Mptx1    |
| Epithelial             | Secretory_cells_Reg4                                | ENSMUSG000000027876.4__Reg4     |
| Epithelial             | Secretory_cells_Reg4                                | ENSMUSG000000018927.3__Ccl6     |
| Epithelial             | Tuft                                                | ENSMUSG000000009246.14__Trpm5   |
| Epithelial             | Tuft                                                | ENSMUSG000000025432.11__Avil    |
| Epithelial             | Enteroendocrine                                     | ENSMUSG000000021194.6__Chga     |
| Epithelial             | Enteroendocrine                                     | ENSMUSG000000027350.8__Chgb     |
| Epithelial             | Enteroendocrine                                     | ENSMUSG0000000061762.12__Tac1   |
| Epithelial             | Enteroendocrine                                     | ENSMUSG000000040046.14__Tph1    |
| Epithelial             | Stem_cells                                          | ENSMUSG000000020140.15__Lgr5    |
| Epithelial             | Stem_cells                                          | ENSMUSG000000009248.6__Ascl2    |
| Epithelial             | Stem_cells                                          | ENSMUSG000000023886.10__Smoc2   |
| Epithelial             | Proliferating_stem_cells_and_transiently_amplifying | ENSMUSG000000031004.8__Mki67    |
| Epithelial             | Proliferating_stem_cells_and_transiently_amplifying | ENSMUSG000000000142.15__Axin2   |
| Epithelial             | Enterocytes                                         | ENSMUSG0000000079440.2__Alpi    |
| Epithelial             | Enterocytes                                         | ENSMUSG000000023073.2__Slc10a2  |
| Epithelial             | Enterocytes                                         | ENSMUSG000000035775.2__Krt20    |
| Epithelial             | Enterocytes                                         | ENSMUSG000000000805.18__Car4    |
| Epithelial             | Enterocytes                                         | ENSMUSG000000074115.5__Saa1     |
| Epithelial             | Enterocytes                                         | ENSMUSG000000032122.15__Slc37a2 |
| Epithelial             | Enterocytes                                         | ENSMUSG000000025467.8__Prap1    |
| Mesenchymal            | Mesenchymal                                         | ENSMUSG000000026728.9__Vim      |
| Mesenchymal            | Mesenchymal                                         | ENSMUSG000000001506.10__Col1a1  |
| Mesenchymal            | Mesenchymal                                         | ENSMUSG000000029231.15__Pdgfra  |
| Mesenchymal            | Crypt_top_fibroblasts                               | ENSMUSG000000021994.15__Wnt5a   |
| Mesenchymal            | Crypt_top_fibroblasts                               | ENSMUSG000000008999.7__Bmp7     |
| Mesenchymal            | Crypt_top_fibroblasts                               | ENSMUSG000000051910.13__Sox6    |
| Mesenchymal            | Crypt_bottom_fibroblast_1_and_2                     | ENSMUSG000000010797.6__Wnt2     |
| Mesenchymal            | Crypt_bottom_fibroblast_1_and_2                     | ENSMUSG000000027840.5__Wnt2b    |
| Mesenchymal            | Crypt_bottom_fibroblast_1_and_2                     | ENSMUSG000000074934.3__Grem1    |
| Mesenchymal            | Crypt_bottom_fibroblast_1_and_2                     | ENSMUSG000000028339.17__Col15a1 |
| Mesenchymal            | Crypt_bottom_fibroblast_1_and_2                     | ENSMUSG000000022371.16__Col14a1 |
| Mesenchymal            | Crypt_bottom_fibroblast_1_and_2                     | ENSMUSG000000030772.6__Dkk3     |
| Mesenchymal            | Crypt_bottom_fibroblast_1                           | ENSMUSG000000030849.18__Fgfr2   |
| Mesenchymal            | Crypt_bottom_fibroblast_1                           | ENSMUSG000000036856.4__Wnt4     |
| Mesenchymal            | Crypt_bottom_fibroblast_2                           | ENSMUSG000000019880.10__Rspo3   |

Supp Table 11: primer sequences

| Type                            | Name                   | Sequence                                                                           | Modification | Purification | Scale    | Dilution                | Stock_concentration |
|---------------------------------|------------------------|------------------------------------------------------------------------------------|--------------|--------------|----------|-------------------------|---------------------|
| Splint_sequences_enhanced_beads | Pdgfra_capture_exon_7  | GAA GCT GTC AAC TTG CAC GAA GTC CAT ACC TAC TAC GCA TA                             | 5_phosph     | HPLC         | 0.2_μmol | ddH2O                   | 100_μM              |
| Splint_sequences_enhanced_beads | Pdgfra_capture_exon_17 | GAC TTT GCT GGA TCT ATT GAG ETT CAT ACC TAC TAC GCA TA                             | 5_phosph     | HPLC         | 0.2_μmol | ddH2O                   | 100_μM              |
| Splint_sequences_enhanced_beads | Dual_tdtomato_eGFP     | CGG CAT GGA CGA GCT GTA CAA GTA ACA TAC CTA CTA CGC ATA                            | 5_phosph     | HPLC         | 0.2_μmol | ddH2O                   | 100_μM              |
| Splint_sequences_enhanced_beads | eGFP                   | CAT GGT CCT GCT GGA GTT CGT GAC CCA TAC CTA CTA CGC ATA                            | 5_phosph     | HPLC         | 0.2_μmol | ddH2O                   | 100_μM              |
| Splint_sequences_enhanced_beads | ABL1                   | CTA AGC ATA ACT AAA GGT GAA AAG CCA TAC CTA CTA CGC ATA                            | 5_phosph     | HPLC         | 0.2_μmol | ddH2O                   | 100_μM              |
| Splint_sequences_enhanced_beads | FOXp3                  | CAT CGT AGC TGC TGG CAG CCA AGG CAT ACC TAC TAC GCA TA                             | 5_phosph     | HPLC         | 0.2_μmol | ddH2O                   | 100_μM              |
| Splint_sequences_enhanced_beads | RAB48                  | CAA CAT CGT GGT CAT CCT CTG TGG CAT ACC TAC TAC GCA TA                             | 5_phosph     | HPLC         | 0.2_μmol | ddH2O                   | 100_μM              |
| Splint_sequences_enhanced_beads | SCN9A                  | CTT CCG TTT CAA TGC CAC ACC TGC CAT ACC TAC TAC GCA TA                             | 5_phosph     | HPLC         | 0.2_μmol | ddH2O                   | 100_μM              |
| Splint_sequences_enhanced_beads | ADRA1D                 | CAC TCA CTC AAG TAC CCA GCC ATC CAT ACC TAC TAC GCA TA                             | 5_phosph     | HPLC         | 0.2_μmol | ddH2O                   | 100_μM              |
| Splint_sequences_enhanced_beads | SDX9                   | CAG CTA CGG CAT CAG CAG CAC CGC CAT ACC TAC TAC GCA TA                             | 5_phosph     | HPLC         | 0.2_μmol | ddH2O                   | 100_μM              |
| Splint_sequences_enhanced_beads | KRT23                  | CAT TGT CAC AAC AGA CCT AGA ACA CAT ACC TAC TAC GCA TA                             | 5_phosph     | HPLC         | 0.2_μmol | ddH2O                   | 100_μM              |
| Splint_sequences_enhanced_beads | EHD3                   | CAA GAT CTG GAA GCT GGC CGA CAT CAT ACC TAC TAC GCA TA                             | 5_phosph     | HPLC         | 0.2_μmol | ddH2O                   | 100_μM              |
| Fluorescent_oligos              | pdgfra_capture_exon_7  | GAA GCT GTC AAC TTG CAC GA                                                         | Atto647N     | HPLC         | 0.2_μmol | ddH2O                   | 100_μM              |
| Fluorescent_oligos              | pdgfra_capture_exon_17 | GAC TTT GCT GGA TCT ATT GA                                                         | Atto647N     | HPLC         | 0.2_μmol | ddH2O                   | 100_μM              |
| Fluorescent_oligos              | dual_tdtomato_eGFP     | CGG CAT GGA CGA GCT GTA CA                                                         | Atto647N     | HPLC         | 0.2_μmol | ddH2O                   | 100_μM              |
| Fluorescent_oligos              | eGFP                   | CAT GGT CCT GCT GGA GTT CG                                                         | Atto647N     | HPLC         | 0.2_μmol | ddH2O                   | 100_μM              |
| Fluorescent_oligos              | FOXp3                  | CAT CGT AGC TGC TGG CAG CC                                                         | Atto647N     | HPLC         | 0.2_μmol | ddH2O                   | 100_μM              |
| Fluorescent_oligos              | KRT23                  | CAT TGT CAC AAC AGA CCT AG                                                         | Atto647N     | HPLC         | 0.2_μmol | ddH2O                   | 100_μM              |
| Fluorescent_oligos              | ABL1                   | CTA AGC ATA ACT AAA GGT GA                                                         |              |              |          |                         |                     |
| Fluorescent_oligos              | polyA                  | AAAAAAAAAAAAAAAAAA                                                                 | Atto647N     | HPLC         | 0.2_μmol | ddH2O                   | 100_μM              |
| Fluorescent_oligos              | TSO                    | CAT ACC TAC TAC GCA TA                                                             | Atto647N     | HPLC         | 0.2_μmol | ddH2O                   | 100_μM              |
| ROIsseq_primers_Hela            | FOXp3                  | TCA GAC GTG TGC TCT TCC GAT CTC ATC TTC TGG AT                                     | -            | HPLC         | 0.2_μmol | ddH2O                   | 100_μM              |
| ROIsseq_primers_Hela            | RAB48                  | TCA GAC GTG TGC TCT TCC GAT CTA CAC AAT CGG CG                                     | -            | HPLC         | 0.2_μmol | ddH2O                   | 100_μM              |
| ROIsseq_primers_Hela            | SCN9A                  | TCA GAC GTG TGC TCT TCC GAT CTA CAA CGC ATT GC                                     | -            | HPLC         | 0.2_μmol | ddH2O                   | 100_μM              |
| ROIsseq_primers_Hela            | ADRA1D                 | TCA GAC GTG TGC TCT TCC GAT CTT GTC ATC CTC TC                                     | -            | HPLC         | 0.2_μmol | ddH2O                   | 100_μM              |
| ROIsseq_primers_Hela            | SDX9                   | TCA GAC GTG TGC TCT TCC GAT CTC GAC GTG CAG CC                                     | -            | HPLC         | 0.2_μmol | ddH2O                   | 100_μM              |
| ROIsseq_primers_Hela            | KRT23                  | TCA GAC GTG TGC TCT TCC GAT CTG ATG ACT TCA AC                                     | -            | HPLC         | 0.2_μmol | ddH2O                   | 100_μM              |
| ROIsseq_primers_Hela            | EHD3                   | TCA GAC GTG TGC TCT TCC GAT CTG GAG AAG GTA TC                                     | -            | HPLC         | 0.2_μmol | ddH2O                   | 100_μM              |
| ROIsseq_primers_BCR:ABL1        | minor_e1a2             | TCA GAC GTG TGC TCT TCC GAT CTC CTT CCA TGG AG                                     | -            | HPLC         | 0.2_μmol | ddH2O                   | 100_μM              |
| ROIsseq_primers_BCR:ABL1        | major_e14a2            | TCA GAC GTG TGC TCT TCC GAT CTA CCA TCA ATA AG                                     | -            | HPLC         | 0.2_μmol | ddH2O                   | 100_μM              |
| ROIsseq_primers_Pdgfra          | rol_16                 | TCA GAC GTG TGC TCT TCC GAT CTA GAA ATC CAT GC                                     | -            | HPLC         | 0.2_μmol | ddH2O                   | 100_μM              |
| ROIsseq_primers_Pdgfra          | rol_15                 | TCA GAC GTG TGC TCT TCC GAT CTC GAG AGC ACA AG                                     | -            | HPLC         | 0.2_μmol | ddH2O                   | 100_μM              |
| ROIsseq_primers_Pdgfra          | rol_14                 | TCA GAC GTG TGC TCT TCC GAT CTC TGC ACC AAG TC                                     | -            | HPLC         | 0.2_μmol | ddH2O                   | 100_μM              |
| ROIsseq_primers_Pdgfra          | rol_13                 | TCA GAC GTG TGC TCT TCC GAT CTG TGA AGA TGC TC                                     | -            | HPLC         | 0.2_μmol | ddH2O                   | 100_μM              |
| ROIsseq_primers_Pdgfra          | rol_6                  | TCA GAC GTG TGC TCT TCC GAT CTC CAT TTC TGT CC                                     | -            | HPLC         | 0.2_μmol | ddH2O                   | 100_μM              |
| ROIsseq_primers_Pdgfra          | rol_5                  | TCA GAC GTG TGC TCT TCC GAT CTA CCC TGG AGA AG                                     | -            | HPLC         | 0.2_μmol | ddH2O                   | 100_μM              |
| ROIsseq_primers_Pdgfra          | rol_4                  | TCA GAC GTG TGC TCT TCC GAT CTG TTT ATG CCT TG                                     | -            | HPLC         | 0.2_μmol | ddH2O                   | 100_μM              |
| ROIsseq_primers_egfp            | eGFP                   | TCA GAC GTG TGC TCT TCC GAT CTG GCA ACT ACA AG                                     | -            | HPLC         | 0.2_μmol | ddH2O                   | 100_μM              |
| ROIsseq_primers_tdtom           | tdTomato_1             | TCA GAC GTG TGC TCT TCC GAT CTG GCT TCA AGT GG                                     | -            | HPLC         | 0.2_μmol | ddH2O                   | 100_μM              |
| ROIsseq_primers_tdtom           | tdTomato_2             | TCA GAC GTG TGC TCT TCC GAT CTA TGG GCT GGG AG                                     | -            | HPLC         | 0.2_μmol | ddH2O                   | 100_μM              |
| Additional_primers              | T_primer               | ACA GGA AAC TCA TGG TGC GT                                                         | -            | HPLC         | 0.2_μmol | DNA_resuspension_buffer | 100_μM              |
| Additional_primers              | T_primer_plus_adapter  | AAT GAT ACG GCG ACC ACC GAG ATC TAC ACT CTT TCC CTA CAC ACA GGA AAC TCA TGG TGC GT | -            | IEX_HPLC     | 0.2_μmol | DNA_resuspension_buffer | 100_μM              |
| Additional_primers              | sequencing_primer      | ACA CTC TTT CCC TAC ACA CAG GAA ACT CAT GGT GCG T                                  | -            | HPLC         | 0.2_μmol | ddH2O                   | 100_μM              |
| Additional_primers              | polyA_protective_oligo | AAAAAAAAAAAAAAAAAA                                                                 | 5_phosph     | HPLC         | 0.2_μmol | ddH2O                   | 100_μM              |
| Additional_primers              | TSO_protective_oligo   | CATACCTACTACGCATA                                                                  | 5_phosph     | HPLC         | 0.2_μmol | ddH2O                   | 100_μM              |

## References for Supplementary Note 1 and Supplementary Tables

1. Battich, N., Stoeger, T. & Pelkmans, L. Image-based transcriptomics in thousands of single human cells at single-molecule resolution. *Nat Methods* **10**, 1127–1133 (2013).
2. Saikia, M. *et al.* Simultaneous multiplexed amplicon sequencing and transcriptome profiling in single cells. *Nat Methods* **16**, 59–62 (2019).
3. Marshall, J. L. *et al.* HyPR-seq: Single-cell quantification of chosen RNAs via hybridization and sequencing of DNA probes. *Proc. Natl. Acad. Sci. U.S.A.* **117**, 33404–33413 (2020).
4. Rodriguez-Meira, A. *et al.* Unravelling Intratumoral Heterogeneity through High-Sensitivity Single-Cell Mutational Analysis and Parallel RNA Sequencing. *Molecular Cell* **73**, 1292-1305.e8 (2019).
5. Uzbas, F. *et al.* BART-Seq: cost-effective massively parallelized targeted sequencing for genomics, transcriptomics, and single-cell analysis. *Genome Biol* **20**, 155 (2019).
6. Nam, A. S. *et al.* Somatic mutations and cell identity linked by Genotyping of Transcriptomes. *Nature* **571**, 355–360 (2019).
7. Cortés-López, M. *et al.* Single-cell multi-omics defines the cell-type-specific impact of splicing aberrations in human hematopoietic clonal outgrowths. *Cell Stem Cell* **30**, 1262-1281.e8 (2023).
8. Zhong, W. *et al.* Identification of Multi-landscape and Cell Interactions in the Tumor Microenvironment through High-Coverage Single-Cell Sequencing. Preprint at <https://doi.org/10.1101/2024.06.18.599463> (2024).
9. Mair, F. *et al.* A Targeted Multi-omic Analysis Approach Measures Protein Expression and Low-Abundance Transcripts on the Single-Cell Level. *Cell Reports* **31**, 107499 (2020).
10. Singh, M. *et al.* High-throughput targeted long-read single cell sequencing reveals the clonal and transcriptional landscape of lymphocytes. *Nat Commun* **10**, 3120 (2019).
11. Van Horebeek, L. *et al.* A targeted sequencing extension for transcript genotyping in single-cell transcriptomics. *Life Sci. Alliance* **6**, e202301971 (2023).
12. Vallejo, A. F. *et al.* Resolving cellular systems by ultra-sensitive and economical single-cell transcriptome filtering. *iScience* **24**, 102147 (2021).
13. Byrne, A. *et al.* Single-cell long-read targeted sequencing reveals transcriptional variation in ovarian cancer. Preprint at <https://doi.org/10.1101/2023.07.17.549422> (2023).
14. Chen, C. *et al.* Single-cell multiomics reveals increased plasticity, resistant populations, and stem-cell-like blasts in KMT2A-rearranged leukemia.
15. Pokhilko, A. *et al.* Targeted single-cell RNA sequencing of transcription factors enhances the identification of cell types and trajectories. *Genome Res.* **31**, 1069–1081 (2021).
16. Zhang, X. *et al.* Comparative Analysis of Droplet-Based Ultra-High-Throughput Single-Cell RNA-Seq Systems. *Molecular Cell* **73**, 130-142.e5 (2019).
17. Gao, C., Zhang, M. & Chen, L. The Comparison of Two Single-cell Sequencing Platforms: BD Rhapsody and 10x Genomics Chromium. *CG* **21**, 602–609 (2020).
