# Supplementary material for: RoCK and ROI: single-cell transcriptomics with multiplexed enrichment of selected transcripts and region-specific sequencing
Source: Springer Nature journal article supplement (doi:10.1038/s41467-025-66248-z), 2025-12-10
Supplement: MOESM2 [file 41467_2025_66248_MOESM2_ESM.pdf › 25985suppl/41467_2025_66248_MOESM2_ESM.pdf]

## **Description of Additional Supplementary Files**

File Name: Supplementary Data 1

Description: Excel sheet containing information on scRNA-seq experiments with relevant metrics including sequencing depth and number of cells before and after filtering.

File Name: Supplementary Data 2

Description: Excel sheet containing information on primer sequences.
