# Supplementary material for: RoCK and ROI: single-cell transcriptomics with multiplexed enrichment of selected transcripts and region-specific sequencing
Source: Nat Commun. 2025 Dec 10;16:10991. doi: 10.1038/s41467-025-66248-z (PMC12695968; doi:10.1038/s41467-025-66248-z)
Supplement: Supplementary file 3 — Supplementary Data 1 [file 41467_2025_66248_MOESM3_ESM.xlsx]

## Sheet: Supplementary Table 1
Supp Table 1: scRNA-seq experiments with relevant metrics including sequencing depth and number of cells before and after filtering.
name_experiment	name_fastqs (R[1,2])	SRR_identifier	conditions	modalities	bead_modification	number_of_ROIseq_primers	number_of_reads_per_sample	number_of_cells_per_condition_(unfiltered)	number_of_cells_per_condition_(after_QC_filtering_and_doublet_removal)
First cell line mixing experiment	o307161_1-Unmodified_S4_R*_001.fastq.gz	SRR28817193	unmod	WTA	No	0	114049402	9768	8587
First cell line mixing experiment	o307161_2-Unmodified_N1_S1_R*_001.fastq.gz	SRR28817192	unmod_T	WTA / TSO	No	0	237386380	10091	7966
Second cell line mixing experiment	315641_1-Unmod_S4_R*_001.fastq.gz	SRR28830618	unmod	WTA	No	0	129406633	8020	6775
Second cell line mixing experiment	315641_2-Unmod_ROI_S2_R*_001.fastq.gz	SRR28830617	unmod_roi	WTA / TSO	No	3	180089428	7003	5724
Second cell line mixing experiment	315641_3-RoCK_S1_R*_001.fastq.gz	SRR28830616	rock	WTA / TSO	Yes	0	203033722	8226	7118
Second cell line mixing experiment	315641_4-RoCK_ROI_S3_R*_001.fastq.gz	SRR28830615	rockroi	WTA / TSO	Yes	3	177851710	6476	5231
Pdgfra epithelial mesenchymal cells	325411_1-Unmod_WTA_S1_R*_001.fastq.gz	SRR28839349	unmod	WTA	No	0	379866683	5711	4634
Pdgfra epithelial mesenchymal cells	325411_2-RoCK_ROI_WTA_S2_R*_001.fastq.gz	SRR28839348	rockroi_unimodal	WTA	Yes	8	368399364	4980	4275
Pdgfra epithelial mesenchymal cells	325402_1-RoCK_ROI_WTA_S1_R*_001.fastq.gz	SRR28839350	rockroi_multimodal	WTA / TSO	Yes	8	665200527	5079	4097
BCR::ABL1 fusion cell lines	331131_1-Cell_lines_50_50_S1_R*_001.fastq.gz	NA	rockroi	WTA / TSO	Yes	2	465285612	6101	5434
BCR::ABL1 fusion patient sample	331131_2-Patient_S2_R*_001.fastq.gz	NA	rockroi	WTA / TSO	Yes	2	383759722	6455	5675
HeLa cells unmodified	384021_1-Unmod_1_S1_R*_001.fastq.gz	SRR35038871	unmod	WTA	No	0	1109565519	6114	5034
HeLa cells modified	387722_1-RoCK_ROI_7_S2_R*_001.fastq.gz	SRR35038870	rockroi	WTA / TSO	Yes	7	1139901915	6307	5429
