# Supplementary material for: RoCK and ROI: single-cell transcriptomics with multiplexed enrichment of selected transcripts and region-specific sequencing
Source: Nat Commun. 2025 Dec 10;16:10991. doi: 10.1038/s41467-025-66248-z (PMC12695968; doi:10.1038/s41467-025-66248-z)
Supplement: Supplementary file 4 — Supplementary Data 2 [file 41467_2025_66248_MOESM4_ESM.xlsx]

## Sheet: Supplementary Table 11
Supp Table 11: primer sequences
Type	Name	Sequence	Modification	Purification	Scale	Dilution	Stock_concentration
Splint_sequences_enhanced_beads	Pdgfra_capture_exon_7	GAA GCT GTC AAC TTG CAC GAA GTC CAT ACC TAC TAC GCA TA	5_phosph	HPLC	0.2_µmol	ddH2O	100_µM
Splint_sequences_enhanced_beads	Pdgfra_capture_exon_17	GAC TTT GCT GGA TCT ATT GAG CTT CAT ACC TAC TAC GCA TA	5_phosph	HPLC	0.2_µmol	ddH2O	100_µM
Splint_sequences_enhanced_beads	Dual_tdtomato _eGFP	CGG CAT GGA CGA GCT GTA CAA GTA ACA TAC CTA CTA CGC ATA	5_phosph	HPLC	0.2_µmol	ddH2O	100_µM
Splint_sequences_enhanced_beads	eGFP	CAT GGT CCT GCT GGA GTT CGT GAC CCA TAC CTA CTA CGC ATA	5_phosph	HPLC	0.2_µmol	ddH2O	100_µM
Splint_sequences_enhanced_beads	ABL1	CTA AGC ATA ACT AAA GGT GAA AAG CCA TAC CTA CTA CGC ATA	5_phosph	HPLC	0.2_µmol	ddH2O	100_µM
Splint_sequences_enhanced_beads	FOXP3	CAT CGT AGC TGC TGG CAG CCA AGG CAT ACC TAC TAC GCA TA	5_phosph	HPLC	0.2_µmol	ddH2O	100_µM
Splint_sequences_enhanced_beads	RAB4B	CAA CAT CGT GGT CAT CCT CTG TGG CAT ACC TAC TAC GCA TA	5_phosph	HPLC	0.2_µmol	ddH2O	100_µM
Splint_sequences_enhanced_beads	SCN9A	CTT CCG TTT CAA TGC CAC ACC TGC CAT ACC TAC TAC GCA TA	5_phosph	HPLC	0.2_µmol	ddH2O	100_µM
Splint_sequences_enhanced_beads	ADRA1D	CAC TCA CTC AAG TAC CCA GCC ATC CAT ACC TAC TAC GCA TA	5_phosph	HPLC	0.2_µmol	ddH2O	100_µM
Splint_sequences_enhanced_beads	SOX9	CAG CTA CGG CAT CAG CAG CAC CGC CAT ACC TAC TAC GCA TA	5_phosph	HPLC	0.2_µmol	ddH2O	100_µM
Splint_sequences_enhanced_beads	KRT23	CAT TGT CAC AAC AGA CCT AGA ACA CAT ACC TAC TAC GCA TA	5_phosph	HPLC	0.2_µmol	ddH2O	100_µM
Splint_sequences_enhanced_beads	EHD3	CAA GAT CTG GAA GCT GGC CGA CAT CAT ACC TAC TAC GCA TA	5_phosph	HPLC	0.2_µmol	ddH2O	100_µM
Fluorescent_oligos	pdgfra_capture_exon_7	GAA GCT GTC AAC TTG CAC GA	Atto647N	HPLC	0.2_µmol	ddH2O	100_µM
Fluorescent_oligos	pdgfra_capture_exon_17	GAC TTT GCT GGA TCT ATT GA	Atto647N	HPLC	0.2_µmol	ddH2O	100_µM
Fluorescent_oligos	dual_tdtomato _eGFP	CGG CAT GGA CGA GCT GTA CA	Atto647N	HPLC	0.2_µmol	ddH2O	100_µM
Fluorescent_oligos	eGFP	CAT GGT CCT GCT GGA GTT CG	Atto647N	HPLC	0.2_µmol	ddH2O	100_µM
Fluorescent_oligos	FOXP3	CAT CGT AGC TGC TGG CAG CC	Atto647N	HPLC	0.2_µmol	ddH2O	100_µM
Fluorescent_oligos	KRT23	CAT TGT CAC AAC AGA CCT AG	Atto647N	HPLC	0.2_µmol	ddH2O	100_µM
Fluorescent_oligos	ABL1	CTA AGC ATA ACT AAA GGT GA
Fluorescent_oligos	polyA	AAAAAAAAAAAAAAAAAA	Atto647N	HPLC	0.2_µmol	ddH2O	100_µM
Fluorescent_oligos	TSO	CAT ACC TAC TAC GCA TA	Atto647N	HPLC	0.2_µmol	ddH2O	100_µM
ROIseq_primers_HeLa	FOXP3	TCA GAC GTG TGC TCT TCC GAT CTC ATC TTC TGG AT	-	HPLC	0.2_µmol	ddH2O	100_µM
ROIseq_primers_HeLa	RAB4B	TCA GAC GTG TGC TCT TCC GAT CTA CAC AAT CGG CG	-	HPLC	0.2_µmol	ddH2O	100_µM
ROIseq_primers_HeLa	SCN9A	TCA GAC GTG TGC TCT TCC GAT CTA CAA CGC ATT GC	-	HPLC	0.2_µmol	ddH2O	100_µM
ROIseq_primers_HeLa	ADRA1D	TCA GAC GTG TGC TCT TCC GAT CTT GTC ATC CTC TC	-	HPLC	0.2_µmol	ddH2O	100_µM
ROIseq_primers_HeLa	SOX9	TCA GAC GTG TGC TCT TCC GAT CTC GAC GTG CAG CC	-	HPLC	0.2_µmol	ddH2O	100_µM
ROIseq_primers_HeLa	KRT23	TCA GAC GTG TGC TCT TCC GAT CTG ATG ACT TCA AC	-	HPLC	0.2_µmol	ddH2O	100_µM
ROIseq_primers_HeLa	EHD3	TCA GAC GTG TGC TCT TCC GAT CTG GAG AAG GTA TC	-	HPLC	0.2_µmol	ddH2O	100_µM
ROIseq_primers_BCR::ABL1	minor_e1a2	TCA GAC GTG TGC TCT TCC GAT CTC CTT CCA TGG AG	-	HPLC	0.2_µmol	ddH2O	100_µM
ROIseq_primers_BCR::ABL1	major_e14a2	TCA GAC GTG TGC TCT TCC GAT CTA CCA TCA ATA AG	-	HPLC	0.2_µmol	ddH2O	100_µM
ROIseq_primers_Pdgfra	roi_16	TCA GAC GTG TGC TCT TCC GAT CTA GAA ATC CAT GC	-	HPLC	0.2_µmol	ddH2O	100_µM
ROIseq_primers_Pdgfra	roi_15	TCA GAC GTG TGC TCT TCC GAT CTC GAG AGC ACA AG	-	HPLC	0.2_µmol	ddH2O	100_µM
ROIseq_primers_Pdgfra	roi_14	TCA GAC GTG TGC TCT TCC GAT CTC TGC ACC AAG TC	-	HPLC	0.2_µmol	ddH2O	100_µM
ROIseq_primers_Pdgfra	roi_13	TCA GAC GTG TGC TCT TCC GAT CTG TGA AGA TGC TC	-	HPLC	0.2_µmol	ddH2O	100_µM
ROIseq_primers_Pdgfra	roi_6	TCA GAC GTG TGC TCT TCC GAT CTC CAT TTC TGT CC	-	HPLC	0.2_µmol	ddH2O	100_µM
ROIseq_primers_Pdgfra	roi_5	TCA GAC GTG TGC TCT TCC GAT CTA CCC TGG AGA AG	-	HPLC	0.2_µmol	ddH2O	100_µM
ROIseq_primers_Pdgfra	roi_4	TCA GAC GTG TGC TCT TCC GAT CTG TTT ATG CCT TG	-	HPLC	0.2_µmol	ddH2O	100_µM
ROIseq_primers_egfp	eGFP	TCA GAC GTG TGC TCT TCC GAT CTG GCA ACT ACA AG	-	HPLC	0.2_µmol	ddH2O	100_µM
ROIseq_primers_tdtom	tdTomato_1	TCA GAC GTG TGC TCT TCC GAT CTG GCT TCA AGT GG	-	HPLC	0.2_µmol	ddH2O	100_µM
ROIseq_primers_tdtom	tdTomato_2	TCA GAC GTG TGC TCT TCC GAT CTA TGG GCT GGG AG	-	HPLC	0.2_µmol	ddH2O	100_µM
Additional_primers	T_primer	ACA GGA AAC TCA TGG TGC GT	-	HPLC	0.2_µmol	DNA_resuspension_buffer	100_µM
Additional_primers	T_primer_plus_adapter	AAT GAT ACG GCG ACC ACC GAG ATC TAC ACT CTT TCC CTA CAC ACA GGA AAC TCA TGG TGC GT	-	IEX _HPLC	0.2_µmol	DNA_resuspension_buffer	100_µM
Additional_primers	sequencing_primer	ACA CTC TTT CCC TAC ACA CAG GAA ACT CAT GGT GCG T	-	HPLC	0.2_µmol	ddH2O	100_µM
Additional_primers	polyA_protective_oligo	AAAAAAAAAAAAAAAAAA	5_phosph	HPLC	0.2_µmol	ddH2O	100_µM
Additional_primers	TSO_protective_oligo	CATACCTACTACGCATA	5_phosph	HPLC	0.2_µmol	ddH2O	100_µM
