# Supplementary material for: RoCK and ROI: single-cell transcriptomics with multiplexed enrichment of selected transcripts and region-specific sequencing
Source: Nat Commun. 2025 Dec 10;16:10991. doi: 10.1038/s41467-025-66248-z (PMC12695968; doi:10.1038/s41467-025-66248-z)
Supplement: Supplementary file 7 — Source Data [file 41467_2025_66248_MOESM7_ESM.xlsx]

## Sheet: Figure 4i
cellID	nSpots	cell_line
2.02	131	egfp_replicate_1
3.02	119	egfp_replicate_1
3.03	144	egfp_replicate_1
3.06	99	egfp_replicate_1
3.08	214	egfp_replicate_1
3.1	111	egfp_replicate_1
3.12	99	egfp_replicate_1
4.01	127	egfp_replicate_1
4.02	147	egfp_replicate_1
4.03	98	egfp_replicate_1
4.05	180	egfp_replicate_1
4.06	84	egfp_replicate_1
4.07	77	egfp_replicate_1
4.08	136	egfp_replicate_1
4.09	132	egfp_replicate_1
4.1	75	egfp_replicate_1
4.11	109	egfp_replicate_1
4.12	133	egfp_replicate_1
4.13	93	egfp_replicate_1
4.14	147	egfp_replicate_1
4.15	82	egfp_replicate_1
5.01	82	egfp_replicate_1
5.02	130	egfp_replicate_1
5.03	109	egfp_replicate_1
5.04	132	egfp_replicate_1
5.05	146	egfp_replicate_1
5.06	125	egfp_replicate_1
5.08	88	egfp_replicate_1
5.09	78	egfp_replicate_1
5.1	105	egfp_replicate_1
5.11	99	egfp_replicate_1
5.12	109	egfp_replicate_1
5.13	127	egfp_replicate_1
5.14	126	egfp_replicate_1
5.15	135	egfp_replicate_1
6.01	119	egfp_replicate_1
6.02	88	egfp_replicate_1
6.03	139	egfp_replicate_1
6.04	73	egfp_replicate_1
6.06	82	egfp_replicate_1
6.07	133	egfp_replicate_1
6.1	155	egfp_replicate_1
6.11	101	egfp_replicate_1
6.13	152	egfp_replicate_1
7.03	67	egfp_replicate_1
7.04	146	egfp_replicate_1
7.05	113	egfp_replicate_1
7.08	100	egfp_replicate_1
7.09	109	egfp_replicate_1
7.1	59	egfp_replicate_1
7.12	137	egfp_replicate_1
7.13	131	egfp_replicate_1
7.14	105	egfp_replicate_1
7.15	233	egfp_replicate_1
8.01	78	egfp_replicate_1
8.02	104	egfp_replicate_1
8.03	107	egfp_replicate_1
8.04	142	egfp_replicate_1
8.05	128	egfp_replicate_1
8.06	110	egfp_replicate_1
8.07	125	egfp_replicate_1
8.08	125	egfp_replicate_1
8.1	123	egfp_replicate_1
8.11	99	egfp_replicate_1
8.12	223	egfp_replicate_1
9.01	81	egfp_replicate_1
9.02	121	egfp_replicate_1
9.03	123	egfp_replicate_1
9.04	107	egfp_replicate_1
9.06	96	egfp_replicate_1
9.07	110	egfp_replicate_1
9.08	93	egfp_replicate_1
9.09	67	egfp_replicate_1
9.1	138	egfp_replicate_1
9.11	143	egfp_replicate_1
9.12	96	egfp_replicate_1
9.14	167	egfp_replicate_1
9.15	181	egfp_replicate_1
10.01	111	egfp_replicate_1
10.03	132	egfp_replicate_1
10.04	140	egfp_replicate_1
10.05	119	egfp_replicate_1
10.06	138	egfp_replicate_1
10.07	123	egfp_replicate_1
10.09	107	egfp_replicate_1
10.1	135	egfp_replicate_1
10.11	88	egfp_replicate_1
10.12	137	egfp_replicate_1
10.13	130	egfp_replicate_1
10.14	79	egfp_replicate_1
10.15	158	egfp_replicate_1
11.01	130	egfp_replicate_1
11.02	143	egfp_replicate_1
11.03	86	egfp_replicate_1
11.05	195	egfp_replicate_1
11.06	30	egfp_replicate_1
11.07	136	egfp_replicate_1
11.08	151	egfp_replicate_1
11.09	77	egfp_replicate_1
11.1	107	egfp_replicate_1
11.12	114	egfp_replicate_1
11.13	94	egfp_replicate_1
11.14	170	egfp_replicate_1
11.15	109	egfp_replicate_1
12.02	165	egfp_replicate_1
12.04	76	egfp_replicate_1
12.05	89	egfp_replicate_1
12.06	142	egfp_replicate_1
12.07	109	egfp_replicate_1
12.08	115	egfp_replicate_1
12.09	72	egfp_replicate_1
12.1	100	egfp_replicate_1
12.11	81	egfp_replicate_1
12.13	92	egfp_replicate_1
12.15	80	egfp_replicate_1
13.01	127	egfp_replicate_1
13.02	117	egfp_replicate_1
13.03	72	egfp_replicate_1
13.04	70	egfp_replicate_1
13.05	114	egfp_replicate_1
13.06	141	egfp_replicate_1
13.07	131	egfp_replicate_1
13.08	92	egfp_replicate_1
13.09	112	egfp_replicate_1
13.1	119	egfp_replicate_1
13.11	151	egfp_replicate_1
13.12	111	egfp_replicate_1
13.13	107	egfp_replicate_1
13.15	116	egfp_replicate_1
14.01	124	egfp_replicate_1
14.02	137	egfp_replicate_1
14.03	136	egfp_replicate_1
14.04	158	egfp_replicate_1
14.05	138	egfp_replicate_1
14.06	102	egfp_replicate_1
14.07	116	egfp_replicate_1
14.08	88	egfp_replicate_1
14.09	149	egfp_replicate_1
14.11	109	egfp_replicate_1
14.12	96	egfp_replicate_1
14.14	78	egfp_replicate_1
14.15	95	egfp_replicate_1
15.01	135	egfp_replicate_1
15.02	120	egfp_replicate_1
15.03	94	egfp_replicate_1
15.04	86	egfp_replicate_1
15.06	108	egfp_replicate_1
15.07	101	egfp_replicate_1
15.08	138	egfp_replicate_1
15.09	165	egfp_replicate_1
15.11	103	egfp_replicate_1
15.12	211	egfp_replicate_1
15.13	122	egfp_replicate_1
15.14	97	egfp_replicate_1
15.15	137	egfp_replicate_1
16.01	91	egfp_replicate_1
16.02	89	egfp_replicate_1
16.03	147	egfp_replicate_1
16.04	125	egfp_replicate_1
16.06	150	egfp_replicate_1
16.07	121	egfp_replicate_1
16.09	120	egfp_replicate_1
16.12	96	egfp_replicate_1
16.13	47	egfp_replicate_1
16.14	168	egfp_replicate_1
17.01	91	egfp_replicate_1
17.02	129	egfp_replicate_1
17.03	129	egfp_replicate_1
17.04	93	egfp_replicate_1
17.06	154	egfp_replicate_1
17.08	114	egfp_replicate_1
17.09	137	egfp_replicate_1
17.13	125	egfp_replicate_1
17.14	62	egfp_replicate_1
17.15	122	egfp_replicate_1
18.01	107	egfp_replicate_1
18.02	83	egfp_replicate_1
18.03	155	egfp_replicate_1
18.04	131	egfp_replicate_1
18.06	123	egfp_replicate_1
18.07	74	egfp_replicate_1
18.08	118	egfp_replicate_1
18.09	77	egfp_replicate_1
18.12	165	egfp_replicate_1
18.15	127	egfp_replicate_1
19.01	156	egfp_replicate_1
19.02	85	egfp_replicate_1
19.03	119	egfp_replicate_1
19.06	176	egfp_replicate_1
19.09	151	egfp_replicate_1
19.11	109	egfp_replicate_1
19.12	104	egfp_replicate_1
19.13	113	egfp_replicate_1
19.14	108	egfp_replicate_1
19.15	117	egfp_replicate_1
20.01	119	egfp_replicate_1
20.02	128	egfp_replicate_1
20.04	72	egfp_replicate_1
20.07	100	egfp_replicate_1
20.08	133	egfp_replicate_1
20.09	92	egfp_replicate_1
20.12	106	egfp_replicate_1
20.13	100	egfp_replicate_1
20.14	108	egfp_replicate_1
20.15	139	egfp_replicate_1
21.01	103	egfp_replicate_1
21.02	117	egfp_replicate_1
21.03	139	egfp_replicate_1
21.04	76	egfp_replicate_1
21.06	81	egfp_replicate_1
21.07	119	egfp_replicate_1
21.09	124	egfp_replicate_1
21.11	94	egfp_replicate_1
21.12	130	egfp_replicate_1
21.15	90	egfp_replicate_1
22.02	132	egfp_replicate_1
22.04	148	egfp_replicate_1
22.06	144	egfp_replicate_1
22.07	110	egfp_replicate_1
22.08	129	egfp_replicate_1
22.11	115	egfp_replicate_1
22.12	118	egfp_replicate_1
22.13	179	egfp_replicate_1
22.14	116	egfp_replicate_1
22.15	107	egfp_replicate_1
23.01	119	egfp_replicate_1
23.02	207	egfp_replicate_1
23.03	119	egfp_replicate_1
23.04	146	egfp_replicate_1
23.08	95	egfp_replicate_1
23.09	142	egfp_replicate_1
23.12	122	egfp_replicate_1
23.13	124	egfp_replicate_1
23.15	147	egfp_replicate_1
24.01	128	egfp_replicate_1
24.02	122	egfp_replicate_1
24.03	126	egfp_replicate_1
24.07	116	egfp_replicate_1
24.09	102	egfp_replicate_1
24.11	119	egfp_replicate_1
24.13	85	egfp_replicate_1
24.14	135	egfp_replicate_1
25.01	90	egfp_replicate_1
25.03	91	egfp_replicate_1
25.07	125	egfp_replicate_1
25.11	105	egfp_replicate_1
25.12	131	egfp_replicate_1
25.14	128	egfp_replicate_1
25.15	154	egfp_replicate_1
26.02	96	egfp_replicate_1
26.03	126	egfp_replicate_1
26.07	68	egfp_replicate_1
26.09	139	egfp_replicate_1
26.11	93	egfp_replicate_1
26.13	94	egfp_replicate_1
27.01	111	egfp_replicate_1
27.02	99	egfp_replicate_1
27.03	92	egfp_replicate_1
27.07	170	egfp_replicate_1
27.09	154	egfp_replicate_1
27.13	118	egfp_replicate_1
27.14	123	egfp_replicate_1
28.01	128	egfp_replicate_1
28.02	181	egfp_replicate_1
28.09	138	egfp_replicate_1
28.13	109	egfp_replicate_1
28.14	137	egfp_replicate_1
29.03	149	egfp_replicate_1
29.07	136	egfp_replicate_1
29.09	117	egfp_replicate_1
29.13	107	egfp_replicate_1
30.02	147	egfp_replicate_1
30.03	126	egfp_replicate_1
30.07	89	egfp_replicate_1
30.13	137	egfp_replicate_1
31.01	158	egfp_replicate_1
31.03	106	egfp_replicate_1
31.07	77	egfp_replicate_1
31.09	123	egfp_replicate_1
31.13	135	egfp_replicate_1
31.14	105	egfp_replicate_1
32.03	136	egfp_replicate_1
32.07	117	egfp_replicate_1
32.09	95	egfp_replicate_1
32.13	112	egfp_replicate_1
33.02	80	egfp_replicate_1
33.07	132	egfp_replicate_1
33.09	154	egfp_replicate_1
33.13	121	egfp_replicate_1
34.01	106	egfp_replicate_1
34.03	74	egfp_replicate_1
35.03	98	egfp_replicate_1
35.09	66	egfp_replicate_1
36.09	127	egfp_replicate_1
1.07	144	egfp_replicate_2
1.09	133	egfp_replicate_2
2.01	114	egfp_replicate_2
2.07	112	egfp_replicate_2
2.08	132	egfp_replicate_2
2.09	126	egfp_replicate_2
2.13	85	egfp_replicate_2
3.01	140	egfp_replicate_2
3.06	161	egfp_replicate_2
3.08	127	egfp_replicate_2
3.1	140	egfp_replicate_2
3.11	116	egfp_replicate_2
3.13	152	egfp_replicate_2
3.14	146	egfp_replicate_2
4.03	151	egfp_replicate_2
4.04	118	egfp_replicate_2
4.05	110	egfp_replicate_2
4.06	145	egfp_replicate_2
4.07	99	egfp_replicate_2
4.08	100	egfp_replicate_2
4.1	105	egfp_replicate_2
4.11	92	egfp_replicate_2
4.12	162	egfp_replicate_2
4.13	105	egfp_replicate_2
4.14	147	egfp_replicate_2
4.15	109	egfp_replicate_2
5.01	162	egfp_replicate_2
5.02	87	egfp_replicate_2
5.03	130	egfp_replicate_2
5.04	123	egfp_replicate_2
5.05	84	egfp_replicate_2
5.06	107	egfp_replicate_2
5.08	159	egfp_replicate_2
5.09	120	egfp_replicate_2
5.11	99	egfp_replicate_2
5.12	146	egfp_replicate_2
5.13	103	egfp_replicate_2
5.14	84	egfp_replicate_2
6.01	148	egfp_replicate_2
6.02	92	egfp_replicate_2
6.03	176	egfp_replicate_2
6.04	94	egfp_replicate_2
6.06	110	egfp_replicate_2
6.07	145	egfp_replicate_2
6.09	160	egfp_replicate_2
6.12	120	egfp_replicate_2
6.13	136	egfp_replicate_2
6.14	123	egfp_replicate_2
7.01	107	egfp_replicate_2
7.02	112	egfp_replicate_2
7.03	137	egfp_replicate_2
7.04	147	egfp_replicate_2
7.05	106	egfp_replicate_2
7.06	175	egfp_replicate_2
7.07	136	egfp_replicate_2
7.08	126	egfp_replicate_2
7.09	131	egfp_replicate_2
7.1	108	egfp_replicate_2
7.11	121	egfp_replicate_2
7.13	161	egfp_replicate_2
7.14	134	egfp_replicate_2
8.01	101	egfp_replicate_2
8.02	106	egfp_replicate_2
8.03	111	egfp_replicate_2
8.06	136	egfp_replicate_2
8.07	103	egfp_replicate_2
8.08	159	egfp_replicate_2
8.09	125	egfp_replicate_2
8.1	132	egfp_replicate_2
8.11	123	egfp_replicate_2
8.12	127	egfp_replicate_2
8.15	336	egfp_replicate_2
9.01	124	egfp_replicate_2
9.02	146	egfp_replicate_2
9.03	234	egfp_replicate_2
9.05	150	egfp_replicate_2
9.07	170	egfp_replicate_2
9.08	134	egfp_replicate_2
9.09	124	egfp_replicate_2
9.1	140	egfp_replicate_2
9.11	123	egfp_replicate_2
9.13	99	egfp_replicate_2
10.01	92	egfp_replicate_2
10.02	177	egfp_replicate_2
10.03	149	egfp_replicate_2
10.04	126	egfp_replicate_2
10.05	113	egfp_replicate_2
10.06	192	egfp_replicate_2
10.07	169	egfp_replicate_2
10.08	114	egfp_replicate_2
10.09	250	egfp_replicate_2
10.12	135	egfp_replicate_2
10.15	141	egfp_replicate_2
11.01	172	egfp_replicate_2
11.02	162	egfp_replicate_2
11.03	198	egfp_replicate_2
11.05	106	egfp_replicate_2
11.06	135	egfp_replicate_2
11.07	75	egfp_replicate_2
11.08	192	egfp_replicate_2
11.1	162	egfp_replicate_2
11.11	115	egfp_replicate_2
11.12	91	egfp_replicate_2
11.13	112	egfp_replicate_2
11.15	112	egfp_replicate_2
12.01	95	egfp_replicate_2
12.03	95	egfp_replicate_2
12.04	119	egfp_replicate_2
12.06	117	egfp_replicate_2
12.08	123	egfp_replicate_2
12.09	96	egfp_replicate_2
12.1	168	egfp_replicate_2
12.12	112	egfp_replicate_2
12.13	120	egfp_replicate_2
13.01	141	egfp_replicate_2
13.02	141	egfp_replicate_2
13.03	133	egfp_replicate_2
13.06	147	egfp_replicate_2
13.07	198	egfp_replicate_2
13.08	125	egfp_replicate_2
13.1	127	egfp_replicate_2
13.11	94	egfp_replicate_2
13.12	163	egfp_replicate_2
13.13	93	egfp_replicate_2
13.15	89	egfp_replicate_2
14.01	148	egfp_replicate_2
14.02	122	egfp_replicate_2
14.03	133	egfp_replicate_2
14.04	120	egfp_replicate_2
14.06	105	egfp_replicate_2
14.07	110	egfp_replicate_2
14.08	103	egfp_replicate_2
14.1	122	egfp_replicate_2
14.11	109	egfp_replicate_2
14.12	147	egfp_replicate_2
14.15	97	egfp_replicate_2
15.01	100	egfp_replicate_2
15.02	152	egfp_replicate_2
15.03	146	egfp_replicate_2
15.04	121	egfp_replicate_2
15.05	115	egfp_replicate_2
15.06	162	egfp_replicate_2
15.07	106	egfp_replicate_2
15.08	119	egfp_replicate_2
15.11	162	egfp_replicate_2
15.12	146	egfp_replicate_2
15.13	129	egfp_replicate_2
16.01	155	egfp_replicate_2
16.02	161	egfp_replicate_2
16.03	90	egfp_replicate_2
16.04	122	egfp_replicate_2
16.05	116	egfp_replicate_2
16.06	103	egfp_replicate_2
16.07	102	egfp_replicate_2
16.08	93	egfp_replicate_2
16.11	117	egfp_replicate_2
16.12	94	egfp_replicate_2
16.13	177	egfp_replicate_2
17.01	179	egfp_replicate_2
17.02	144	egfp_replicate_2
17.03	151	egfp_replicate_2
17.04	117	egfp_replicate_2
17.05	159	egfp_replicate_2
17.06	130	egfp_replicate_2
17.07	160	egfp_replicate_2
17.08	113	egfp_replicate_2
17.11	108	egfp_replicate_2
17.12	103	egfp_replicate_2
17.13	137	egfp_replicate_2
17.15	58	egfp_replicate_2
18.01	114	egfp_replicate_2
18.02	149	egfp_replicate_2
18.03	157	egfp_replicate_2
18.04	145	egfp_replicate_2
18.06	182	egfp_replicate_2
18.07	84	egfp_replicate_2
18.08	121	egfp_replicate_2
18.11	128	egfp_replicate_2
18.12	148	egfp_replicate_2
18.13	98	egfp_replicate_2
19.01	157	egfp_replicate_2
19.02	110	egfp_replicate_2
19.03	143	egfp_replicate_2
19.06	120	egfp_replicate_2
19.08	164	egfp_replicate_2
19.11	160	egfp_replicate_2
19.12	143	egfp_replicate_2
19.13	59	egfp_replicate_2
20.01	140	egfp_replicate_2
20.03	201	egfp_replicate_2
20.04	163	egfp_replicate_2
20.06	107	egfp_replicate_2
20.11	118	egfp_replicate_2
20.13	153	egfp_replicate_2
21.01	96	egfp_replicate_2
21.02	124	egfp_replicate_2
21.03	85	egfp_replicate_2
21.04	138	egfp_replicate_2
21.06	134	egfp_replicate_2
21.07	136	egfp_replicate_2
21.08	101	egfp_replicate_2
21.11	136	egfp_replicate_2
21.12	120	egfp_replicate_2
22.01	88	egfp_replicate_2
22.02	130	egfp_replicate_2
22.03	192	egfp_replicate_2
22.06	163	egfp_replicate_2
22.11	128	egfp_replicate_2
22.12	134	egfp_replicate_2
22.13	123	egfp_replicate_2
23.02	102	egfp_replicate_2
23.03	137	egfp_replicate_2
23.06	181	egfp_replicate_2
23.07	141	egfp_replicate_2
23.08	123	egfp_replicate_2
23.11	127	egfp_replicate_2
24.01	118	egfp_replicate_2
24.03	96	egfp_replicate_2
24.06	152	egfp_replicate_2
24.07	183	egfp_replicate_2
24.13	184	egfp_replicate_2
25.01	140	egfp_replicate_2
25.03	117	egfp_replicate_2
25.06	124	egfp_replicate_2
25.07	182	egfp_replicate_2
25.12	115	egfp_replicate_2
26.01	113	egfp_replicate_2
26.06	121	egfp_replicate_2
26.12	111	egfp_replicate_2
26.13	114	egfp_replicate_2
27.01	138	egfp_replicate_2
27.06	132	egfp_replicate_2
27.12	116	egfp_replicate_2
28.01	87	egfp_replicate_2
28.06	148	egfp_replicate_2
29.01	114	egfp_replicate_2
29.06	176	egfp_replicate_2
29.12	119	egfp_replicate_2
30.06	159	egfp_replicate_2
31.06	131	egfp_replicate_2
33.06	101	egfp_replicate_2
34.06	78	egfp_replicate_2
1.05	1	wt
1.07	2	wt
1.08	3	wt
1.14	0	wt
2.01	1	wt
2.02	4	wt
2.04	1	wt
2.05	1	wt
2.07	4	wt
2.1	0	wt
2.11	0	wt
3.01	2	wt
3.02	3	wt
3.03	3	wt
3.04	0	wt
3.08	1	wt
3.09	1	wt
3.1	2	wt
3.11	0	wt
3.13	4	wt
3.14	0	wt
4.03	3	wt
4.08	0	wt
4.09	0	wt
4.1	1	wt
4.11	0	wt
4.12	6	wt
4.13	1	wt
5.02	1	wt
5.06	1	wt
5.07	0	wt
5.08	2	wt
5.1	0	wt
5.11	0	wt
5.12	1	wt
5.13	2	wt
5.14	0	wt
6.03	0	wt
6.06	0	wt
6.07	0	wt
6.08	5	wt
6.09	0	wt
6.1	1	wt
6.12	0	wt
6.13	2	wt
6.14	1	wt
7.02	0	wt
7.07	0	wt
7.08	2	wt
7.1	0	wt
7.13	2	wt
7.14	0	wt
8.07	3	wt
8.1	0	wt
8.13	0	wt
8.14	0	wt
9.08	1	wt
9.13	0	wt
10.07	1	wt
10.13	1	wt
10.14	0	wt
11.07	1	wt
11.08	0	wt
11.13	0	wt
11.14	0	wt
12.14	0	wt
13.13	0	wt
13.14	0	wt
14.13	1	wt
14.14	0	wt
15.13	0	wt
16.13	1	wt
17.14	0	wt
1.04	4	tdtomato
1.12	0	tdtomato
1.13	4	tdtomato
2.04	2	tdtomato
2.11	8	tdtomato
3.01	5	tdtomato
3.03	2	tdtomato
3.04	4	tdtomato
3.06	2	tdtomato
3.07	1	tdtomato
3.09	1	tdtomato
3.11	7	tdtomato
3.12	2	tdtomato
3.13	3	tdtomato
3.14	3	tdtomato
4.01	3	tdtomato
4.02	0	tdtomato
4.04	1	tdtomato
4.06	0	tdtomato
4.07	12	tdtomato
4.09	1	tdtomato
4.12	1	tdtomato
4.13	4	tdtomato
5.01	3	tdtomato
5.02	6	tdtomato
5.03	3	tdtomato
5.04	5	tdtomato
5.05	5	tdtomato
5.06	0	tdtomato
5.07	2	tdtomato
5.08	1	tdtomato
5.09	0	tdtomato
5.1	4	tdtomato
5.11	4	tdtomato
5.12	5	tdtomato
5.13	6	tdtomato
5.14	8	tdtomato
6.01	3	tdtomato
6.02	9	tdtomato
6.03	1	tdtomato
6.05	2	tdtomato
6.06	2	tdtomato
6.07	2	tdtomato
6.08	2	tdtomato
6.09	1	tdtomato
6.11	2	tdtomato
6.12	3	tdtomato
6.13	1	tdtomato
6.14	3	tdtomato
6.15	1	tdtomato
7.01	4	tdtomato
7.02	1	tdtomato
7.03	0	tdtomato
7.04	1	tdtomato
7.05	3	tdtomato
7.06	1	tdtomato
7.07	2	tdtomato
7.08	5	tdtomato
7.09	1	tdtomato
7.1	2	tdtomato
7.11	0	tdtomato
7.12	2	tdtomato
7.13	4	tdtomato
7.14	0	tdtomato
7.15	4	tdtomato
8.01	0	tdtomato
8.02	3	tdtomato
8.05	7	tdtomato
8.07	1	tdtomato
8.08	5	tdtomato
8.09	3	tdtomato
8.11	11	tdtomato
8.12	4	tdtomato
8.13	5	tdtomato
8.14	2	tdtomato
8.15	8	tdtomato
9.01	3	tdtomato
9.02	1	tdtomato
9.03	3	tdtomato
9.04	7	tdtomato
9.05	4	tdtomato
9.07	2	tdtomato
9.08	5	tdtomato
9.09	1	tdtomato
9.1	0	tdtomato
9.11	3	tdtomato
9.15	0	tdtomato
10.01	4	tdtomato
10.02	0	tdtomato
10.03	0	tdtomato
10.04	2	tdtomato
10.07	5	tdtomato
10.08	3	tdtomato
10.09	2	tdtomato
10.11	4	tdtomato
10.12	0	tdtomato
10.14	1	tdtomato
10.15	0	tdtomato
11.01	3	tdtomato
11.02	4	tdtomato
11.03	2	tdtomato
11.04	3	tdtomato
11.05	1	tdtomato
11.07	4	tdtomato
11.08	1	tdtomato
11.09	0	tdtomato
11.1	1	tdtomato
11.11	3	tdtomato
11.12	3	tdtomato
11.13	1	tdtomato
11.14	0	tdtomato
11.15	3	tdtomato
12.03	0	tdtomato
12.04	3	tdtomato
12.05	3	tdtomato
12.08	2	tdtomato
12.09	0	tdtomato
12.1	3	tdtomato
12.11	5	tdtomato
12.12	1	tdtomato
12.13	1	tdtomato
12.14	0	tdtomato
12.15	0	tdtomato
13.02	3	tdtomato
13.03	7	tdtomato
13.04	1	tdtomato
13.05	3	tdtomato
13.07	0	tdtomato
13.08	5	tdtomato
13.09	0	tdtomato
13.11	2	tdtomato
13.12	1	tdtomato
13.13	2	tdtomato
13.14	4	tdtomato
14.01	2	tdtomato
14.02	1	tdtomato
14.03	3	tdtomato
14.04	0	tdtomato
14.05	0	tdtomato
14.07	1	tdtomato
14.08	0	tdtomato
14.09	0	tdtomato
14.1	7	tdtomato
14.11	1	tdtomato
14.12	3	tdtomato
14.13	1	tdtomato
15.01	1	tdtomato
15.02	2	tdtomato
15.03	4	tdtomato
15.04	1	tdtomato
15.05	0	tdtomato
15.07	0	tdtomato
15.08	0	tdtomato
15.09	0	tdtomato
15.1	2	tdtomato
15.11	4	tdtomato
15.13	1	tdtomato
15.14	3	tdtomato
15.15	1	tdtomato
16.01	0	tdtomato
16.02	4	tdtomato
16.03	1	tdtomato
16.04	0	tdtomato
16.05	1	tdtomato
16.07	0	tdtomato
16.08	0	tdtomato
16.09	1	tdtomato
16.1	0	tdtomato
16.11	2	tdtomato
16.12	1	tdtomato
16.13	0	tdtomato
16.14	0	tdtomato
16.15	0	tdtomato
17.03	1	tdtomato
17.07	0	tdtomato
17.08	1	tdtomato
17.09	0	tdtomato
17.1	0	tdtomato
17.11	7	tdtomato
17.12	0	tdtomato
17.13	1	tdtomato
17.15	2	tdtomato
18.01	0	tdtomato
18.02	2	tdtomato
18.03	0	tdtomato
18.04	1	tdtomato
18.05	0	tdtomato
18.08	4	tdtomato
18.09	0	tdtomato
18.1	0	tdtomato
18.11	2	tdtomato
18.12	1	tdtomato
18.14	1	tdtomato
18.15	3	tdtomato
19.01	1	tdtomato
19.08	1	tdtomato
19.1	1	tdtomato
19.11	1	tdtomato
19.12	1	tdtomato
19.13	4	tdtomato
19.15	0	tdtomato
20.03	2	tdtomato
20.04	0	tdtomato
20.05	2	tdtomato
20.07	0	tdtomato
20.09	0	tdtomato
20.1	0	tdtomato
20.11	0	tdtomato
20.13	0	tdtomato
21.02	0	tdtomato
21.03	4	tdtomato
21.05	3	tdtomato
21.07	0	tdtomato
21.08	0	tdtomato
21.09	1	tdtomato
21.1	3	tdtomato
21.11	0	tdtomato
21.12	1	tdtomato
21.15	0	tdtomato
22.02	0	tdtomato
22.03	0	tdtomato
22.05	5	tdtomato
22.08	4	tdtomato
22.09	0	tdtomato
22.1	1	tdtomato
22.11	3	tdtomato
22.12	0	tdtomato
22.15	0	tdtomato
23.02	0	tdtomato
23.05	3	tdtomato
23.08	3	tdtomato
23.1	0	tdtomato
23.11	0	tdtomato
23.13	0	tdtomato
23.15	0	tdtomato
24.02	1	tdtomato
24.03	0	tdtomato
24.05	3	tdtomato
24.08	0	tdtomato
24.1	1	tdtomato
24.15	0	tdtomato
25.02	0	tdtomato
25.03	1	tdtomato
25.05	3	tdtomato
25.08	0	tdtomato
25.1	0	tdtomato
25.11	4	tdtomato
25.15	0	tdtomato
26.02	1	tdtomato
26.03	0	tdtomato
26.05	0	tdtomato
26.1	0	tdtomato
26.11	4	tdtomato
26.15	1	tdtomato
27.03	0	tdtomato
27.05	0	tdtomato
27.08	1	tdtomato
27.1	0	tdtomato
27.11	0	tdtomato
28.02	0	tdtomato
28.05	1	tdtomato
28.1	1	tdtomato
28.11	1	tdtomato
28.15	0	tdtomato
29.02	0	tdtomato
29.03	2	tdtomato
29.05	1	tdtomato
29.1	0	tdtomato
30.02	0	tdtomato
30.03	0	tdtomato
30.05	0	tdtomato
30.1	0	tdtomato
31.02	0	tdtomato
31.03	1	tdtomato
31.05	1	tdtomato
32.02	0	tdtomato
32.03	0	tdtomato
32.05	1	tdtomato
32.1	0	tdtomato
33.1	0	tdtomato
34.03	0	tdtomato
34.05	0	tdtomato
35.03	0	tdtomato
35.05	1	tdtomato
36.03	0	tdtomato
36.05	1	tdtomato
36.1	0	tdtomato
37.03	0	tdtomato
37.05	0	tdtomato
38.03	0	tdtomato
39.03	0	tdtomato
45.03	0	tdtomato

## Sheet: Supp Figure 8i
cellID	nSpots	cell_line
2.02	131	egfp_replicate_1
3.02	119	egfp_replicate_1
3.03	144	egfp_replicate_1
3.06	99	egfp_replicate_1
3.08	214	egfp_replicate_1
3.1	111	egfp_replicate_1
3.12	99	egfp_replicate_1
4.01	127	egfp_replicate_1
4.02	147	egfp_replicate_1
4.03	98	egfp_replicate_1
4.05	180	egfp_replicate_1
4.06	84	egfp_replicate_1
4.07	77	egfp_replicate_1
4.08	136	egfp_replicate_1
4.09	132	egfp_replicate_1
4.1	75	egfp_replicate_1
4.11	109	egfp_replicate_1
4.12	133	egfp_replicate_1
4.13	93	egfp_replicate_1
4.14	147	egfp_replicate_1
4.15	82	egfp_replicate_1
5.01	82	egfp_replicate_1
5.02	130	egfp_replicate_1
5.03	109	egfp_replicate_1
5.04	132	egfp_replicate_1
5.05	146	egfp_replicate_1
5.06	125	egfp_replicate_1
5.08	88	egfp_replicate_1
5.09	78	egfp_replicate_1
5.1	105	egfp_replicate_1
5.11	99	egfp_replicate_1
5.12	109	egfp_replicate_1
5.13	127	egfp_replicate_1
5.14	126	egfp_replicate_1
5.15	135	egfp_replicate_1
6.01	119	egfp_replicate_1
6.02	88	egfp_replicate_1
6.03	139	egfp_replicate_1
6.04	73	egfp_replicate_1
6.06	82	egfp_replicate_1
6.07	133	egfp_replicate_1
6.1	155	egfp_replicate_1
6.11	101	egfp_replicate_1
6.13	152	egfp_replicate_1
7.03	67	egfp_replicate_1
7.04	146	egfp_replicate_1
7.05	113	egfp_replicate_1
7.08	100	egfp_replicate_1
7.09	109	egfp_replicate_1
7.1	59	egfp_replicate_1
7.12	137	egfp_replicate_1
7.13	131	egfp_replicate_1
7.14	105	egfp_replicate_1
7.15	233	egfp_replicate_1
8.01	78	egfp_replicate_1
8.02	104	egfp_replicate_1
8.03	107	egfp_replicate_1
8.04	142	egfp_replicate_1
8.05	128	egfp_replicate_1
8.06	110	egfp_replicate_1
8.07	125	egfp_replicate_1
8.08	125	egfp_replicate_1
8.1	123	egfp_replicate_1
8.11	99	egfp_replicate_1
8.12	223	egfp_replicate_1
9.01	81	egfp_replicate_1
9.02	121	egfp_replicate_1
9.03	123	egfp_replicate_1
9.04	107	egfp_replicate_1
9.06	96	egfp_replicate_1
9.07	110	egfp_replicate_1
9.08	93	egfp_replicate_1
9.09	67	egfp_replicate_1
9.1	138	egfp_replicate_1
9.11	143	egfp_replicate_1
9.12	96	egfp_replicate_1
9.14	167	egfp_replicate_1
9.15	181	egfp_replicate_1
10.01	111	egfp_replicate_1
10.03	132	egfp_replicate_1
10.04	140	egfp_replicate_1
10.05	119	egfp_replicate_1
10.06	138	egfp_replicate_1
10.07	123	egfp_replicate_1
10.09	107	egfp_replicate_1
10.1	135	egfp_replicate_1
10.11	88	egfp_replicate_1
10.12	137	egfp_replicate_1
10.13	130	egfp_replicate_1
10.14	79	egfp_replicate_1
10.15	158	egfp_replicate_1
11.01	130	egfp_replicate_1
11.02	143	egfp_replicate_1
11.03	86	egfp_replicate_1
11.05	195	egfp_replicate_1
11.06	30	egfp_replicate_1
11.07	136	egfp_replicate_1
11.08	151	egfp_replicate_1
11.09	77	egfp_replicate_1
11.1	107	egfp_replicate_1
11.12	114	egfp_replicate_1
11.13	94	egfp_replicate_1
11.14	170	egfp_replicate_1
11.15	109	egfp_replicate_1
12.02	165	egfp_replicate_1
12.04	76	egfp_replicate_1
12.05	89	egfp_replicate_1
12.06	142	egfp_replicate_1
12.07	109	egfp_replicate_1
12.08	115	egfp_replicate_1
12.09	72	egfp_replicate_1
12.1	100	egfp_replicate_1
12.11	81	egfp_replicate_1
12.13	92	egfp_replicate_1
12.15	80	egfp_replicate_1
13.01	127	egfp_replicate_1
13.02	117	egfp_replicate_1
13.03	72	egfp_replicate_1
13.04	70	egfp_replicate_1
13.05	114	egfp_replicate_1
13.06	141	egfp_replicate_1
13.07	131	egfp_replicate_1
13.08	92	egfp_replicate_1
13.09	112	egfp_replicate_1
13.1	119	egfp_replicate_1
13.11	151	egfp_replicate_1
13.12	111	egfp_replicate_1
13.13	107	egfp_replicate_1
13.15	116	egfp_replicate_1
14.01	124	egfp_replicate_1
14.02	137	egfp_replicate_1
14.03	136	egfp_replicate_1
14.04	158	egfp_replicate_1
14.05	138	egfp_replicate_1
14.06	102	egfp_replicate_1
14.07	116	egfp_replicate_1
14.08	88	egfp_replicate_1
14.09	149	egfp_replicate_1
14.11	109	egfp_replicate_1
14.12	96	egfp_replicate_1
14.14	78	egfp_replicate_1
14.15	95	egfp_replicate_1
15.01	135	egfp_replicate_1
15.02	120	egfp_replicate_1
15.03	94	egfp_replicate_1
15.04	86	egfp_replicate_1
15.06	108	egfp_replicate_1
15.07	101	egfp_replicate_1
15.08	138	egfp_replicate_1
15.09	165	egfp_replicate_1
15.11	103	egfp_replicate_1
15.12	211	egfp_replicate_1
15.13	122	egfp_replicate_1
15.14	97	egfp_replicate_1
15.15	137	egfp_replicate_1
16.01	91	egfp_replicate_1
16.02	89	egfp_replicate_1
16.03	147	egfp_replicate_1
16.04	125	egfp_replicate_1
16.06	150	egfp_replicate_1
16.07	121	egfp_replicate_1
16.09	120	egfp_replicate_1
16.12	96	egfp_replicate_1
16.13	47	egfp_replicate_1
16.14	168	egfp_replicate_1
17.01	91	egfp_replicate_1
17.02	129	egfp_replicate_1
17.03	129	egfp_replicate_1
17.04	93	egfp_replicate_1
17.06	154	egfp_replicate_1
17.08	114	egfp_replicate_1
17.09	137	egfp_replicate_1
17.13	125	egfp_replicate_1
17.14	62	egfp_replicate_1
17.15	122	egfp_replicate_1
18.01	107	egfp_replicate_1
18.02	83	egfp_replicate_1
18.03	155	egfp_replicate_1
18.04	131	egfp_replicate_1
18.06	123	egfp_replicate_1
18.07	74	egfp_replicate_1
18.08	118	egfp_replicate_1
18.09	77	egfp_replicate_1
18.12	165	egfp_replicate_1
18.15	127	egfp_replicate_1
19.01	156	egfp_replicate_1
19.02	85	egfp_replicate_1
19.03	119	egfp_replicate_1
19.06	176	egfp_replicate_1
19.09	151	egfp_replicate_1
19.11	109	egfp_replicate_1
19.12	104	egfp_replicate_1
19.13	113	egfp_replicate_1
19.14	108	egfp_replicate_1
19.15	117	egfp_replicate_1
20.01	119	egfp_replicate_1
20.02	128	egfp_replicate_1
20.04	72	egfp_replicate_1
20.07	100	egfp_replicate_1
20.08	133	egfp_replicate_1
20.09	92	egfp_replicate_1
20.12	106	egfp_replicate_1
20.13	100	egfp_replicate_1
20.14	108	egfp_replicate_1
20.15	139	egfp_replicate_1
21.01	103	egfp_replicate_1
21.02	117	egfp_replicate_1
21.03	139	egfp_replicate_1
21.04	76	egfp_replicate_1
21.06	81	egfp_replicate_1
21.07	119	egfp_replicate_1
21.09	124	egfp_replicate_1
21.11	94	egfp_replicate_1
21.12	130	egfp_replicate_1
21.15	90	egfp_replicate_1
22.02	132	egfp_replicate_1
22.04	148	egfp_replicate_1
22.06	144	egfp_replicate_1
22.07	110	egfp_replicate_1
22.08	129	egfp_replicate_1
22.11	115	egfp_replicate_1
22.12	118	egfp_replicate_1
22.13	179	egfp_replicate_1
22.14	116	egfp_replicate_1
22.15	107	egfp_replicate_1
23.01	119	egfp_replicate_1
23.02	207	egfp_replicate_1
23.03	119	egfp_replicate_1
23.04	146	egfp_replicate_1
23.08	95	egfp_replicate_1
23.09	142	egfp_replicate_1
23.12	122	egfp_replicate_1
23.13	124	egfp_replicate_1
23.15	147	egfp_replicate_1
24.01	128	egfp_replicate_1
24.02	122	egfp_replicate_1
24.03	126	egfp_replicate_1
24.07	116	egfp_replicate_1
24.09	102	egfp_replicate_1
24.11	119	egfp_replicate_1
24.13	85	egfp_replicate_1
24.14	135	egfp_replicate_1
25.01	90	egfp_replicate_1
25.03	91	egfp_replicate_1
25.07	125	egfp_replicate_1
25.11	105	egfp_replicate_1
25.12	131	egfp_replicate_1
25.14	128	egfp_replicate_1
25.15	154	egfp_replicate_1
26.02	96	egfp_replicate_1
26.03	126	egfp_replicate_1
26.07	68	egfp_replicate_1
26.09	139	egfp_replicate_1
26.11	93	egfp_replicate_1
26.13	94	egfp_replicate_1
27.01	111	egfp_replicate_1
27.02	99	egfp_replicate_1
27.03	92	egfp_replicate_1
27.07	170	egfp_replicate_1
27.09	154	egfp_replicate_1
27.13	118	egfp_replicate_1
27.14	123	egfp_replicate_1
28.01	128	egfp_replicate_1
28.02	181	egfp_replicate_1
28.09	138	egfp_replicate_1
28.13	109	egfp_replicate_1
28.14	137	egfp_replicate_1
29.03	149	egfp_replicate_1
29.07	136	egfp_replicate_1
29.09	117	egfp_replicate_1
29.13	107	egfp_replicate_1
30.02	147	egfp_replicate_1
30.03	126	egfp_replicate_1
30.07	89	egfp_replicate_1
30.13	137	egfp_replicate_1
31.01	158	egfp_replicate_1
31.03	106	egfp_replicate_1
31.07	77	egfp_replicate_1
31.09	123	egfp_replicate_1
31.13	135	egfp_replicate_1
31.14	105	egfp_replicate_1
32.03	136	egfp_replicate_1
32.07	117	egfp_replicate_1
32.09	95	egfp_replicate_1
32.13	112	egfp_replicate_1
33.02	80	egfp_replicate_1
33.07	132	egfp_replicate_1
33.09	154	egfp_replicate_1
33.13	121	egfp_replicate_1
34.01	106	egfp_replicate_1
34.03	74	egfp_replicate_1
35.03	98	egfp_replicate_1
35.09	66	egfp_replicate_1
36.09	127	egfp_replicate_1
1.07	144	egfp_replicate_2
1.09	133	egfp_replicate_2
2.01	114	egfp_replicate_2
2.07	112	egfp_replicate_2
2.08	132	egfp_replicate_2
2.09	126	egfp_replicate_2
2.13	85	egfp_replicate_2
3.01	140	egfp_replicate_2
3.06	161	egfp_replicate_2
3.08	127	egfp_replicate_2
3.1	140	egfp_replicate_2
3.11	116	egfp_replicate_2
3.13	152	egfp_replicate_2
3.14	146	egfp_replicate_2
4.03	151	egfp_replicate_2
4.04	118	egfp_replicate_2
4.05	110	egfp_replicate_2
4.06	145	egfp_replicate_2
4.07	99	egfp_replicate_2
4.08	100	egfp_replicate_2
4.1	105	egfp_replicate_2
4.11	92	egfp_replicate_2
4.12	162	egfp_replicate_2
4.13	105	egfp_replicate_2
4.14	147	egfp_replicate_2
4.15	109	egfp_replicate_2
5.01	162	egfp_replicate_2
5.02	87	egfp_replicate_2
5.03	130	egfp_replicate_2
5.04	123	egfp_replicate_2
5.05	84	egfp_replicate_2
5.06	107	egfp_replicate_2
5.08	159	egfp_replicate_2
5.09	120	egfp_replicate_2
5.11	99	egfp_replicate_2
5.12	146	egfp_replicate_2
5.13	103	egfp_replicate_2
5.14	84	egfp_replicate_2
6.01	148	egfp_replicate_2
6.02	92	egfp_replicate_2
6.03	176	egfp_replicate_2
6.04	94	egfp_replicate_2
6.06	110	egfp_replicate_2
6.07	145	egfp_replicate_2
6.09	160	egfp_replicate_2
6.12	120	egfp_replicate_2
6.13	136	egfp_replicate_2
6.14	123	egfp_replicate_2
7.01	107	egfp_replicate_2
7.02	112	egfp_replicate_2
7.03	137	egfp_replicate_2
7.04	147	egfp_replicate_2
7.05	106	egfp_replicate_2
7.06	175	egfp_replicate_2
7.07	136	egfp_replicate_2
7.08	126	egfp_replicate_2
7.09	131	egfp_replicate_2
7.1	108	egfp_replicate_2
7.11	121	egfp_replicate_2
7.13	161	egfp_replicate_2
7.14	134	egfp_replicate_2
8.01	101	egfp_replicate_2
8.02	106	egfp_replicate_2
8.03	111	egfp_replicate_2
8.06	136	egfp_replicate_2
8.07	103	egfp_replicate_2
8.08	159	egfp_replicate_2
8.09	125	egfp_replicate_2
8.1	132	egfp_replicate_2
8.11	123	egfp_replicate_2
8.12	127	egfp_replicate_2
8.15	336	egfp_replicate_2
9.01	124	egfp_replicate_2
9.02	146	egfp_replicate_2
9.03	234	egfp_replicate_2
9.05	150	egfp_replicate_2
9.07	170	egfp_replicate_2
9.08	134	egfp_replicate_2
9.09	124	egfp_replicate_2
9.1	140	egfp_replicate_2
9.11	123	egfp_replicate_2
9.13	99	egfp_replicate_2
10.01	92	egfp_replicate_2
10.02	177	egfp_replicate_2
10.03	149	egfp_replicate_2
10.04	126	egfp_replicate_2
10.05	113	egfp_replicate_2
10.06	192	egfp_replicate_2
10.07	169	egfp_replicate_2
10.08	114	egfp_replicate_2
10.09	250	egfp_replicate_2
10.12	135	egfp_replicate_2
10.15	141	egfp_replicate_2
11.01	172	egfp_replicate_2
11.02	162	egfp_replicate_2
11.03	198	egfp_replicate_2
11.05	106	egfp_replicate_2
11.06	135	egfp_replicate_2
11.07	75	egfp_replicate_2
11.08	192	egfp_replicate_2
11.1	162	egfp_replicate_2
11.11	115	egfp_replicate_2
11.12	91	egfp_replicate_2
11.13	112	egfp_replicate_2
11.15	112	egfp_replicate_2
12.01	95	egfp_replicate_2
12.03	95	egfp_replicate_2
12.04	119	egfp_replicate_2
12.06	117	egfp_replicate_2
12.08	123	egfp_replicate_2
12.09	96	egfp_replicate_2
12.1	168	egfp_replicate_2
12.12	112	egfp_replicate_2
12.13	120	egfp_replicate_2
13.01	141	egfp_replicate_2
13.02	141	egfp_replicate_2
13.03	133	egfp_replicate_2
13.06	147	egfp_replicate_2
13.07	198	egfp_replicate_2
13.08	125	egfp_replicate_2
13.1	127	egfp_replicate_2
13.11	94	egfp_replicate_2
13.12	163	egfp_replicate_2
13.13	93	egfp_replicate_2
13.15	89	egfp_replicate_2
14.01	148	egfp_replicate_2
14.02	122	egfp_replicate_2
14.03	133	egfp_replicate_2
14.04	120	egfp_replicate_2
14.06	105	egfp_replicate_2
14.07	110	egfp_replicate_2
14.08	103	egfp_replicate_2
14.1	122	egfp_replicate_2
14.11	109	egfp_replicate_2
14.12	147	egfp_replicate_2
14.15	97	egfp_replicate_2
15.01	100	egfp_replicate_2
15.02	152	egfp_replicate_2
15.03	146	egfp_replicate_2
15.04	121	egfp_replicate_2
15.05	115	egfp_replicate_2
15.06	162	egfp_replicate_2
15.07	106	egfp_replicate_2
15.08	119	egfp_replicate_2
15.11	162	egfp_replicate_2
15.12	146	egfp_replicate_2
15.13	129	egfp_replicate_2
16.01	155	egfp_replicate_2
16.02	161	egfp_replicate_2
16.03	90	egfp_replicate_2
16.04	122	egfp_replicate_2
16.05	116	egfp_replicate_2
16.06	103	egfp_replicate_2
16.07	102	egfp_replicate_2
16.08	93	egfp_replicate_2
16.11	117	egfp_replicate_2
16.12	94	egfp_replicate_2
16.13	177	egfp_replicate_2
17.01	179	egfp_replicate_2
17.02	144	egfp_replicate_2
17.03	151	egfp_replicate_2
17.04	117	egfp_replicate_2
17.05	159	egfp_replicate_2
17.06	130	egfp_replicate_2
17.07	160	egfp_replicate_2
17.08	113	egfp_replicate_2
17.11	108	egfp_replicate_2
17.12	103	egfp_replicate_2
17.13	137	egfp_replicate_2
17.15	58	egfp_replicate_2
18.01	114	egfp_replicate_2
18.02	149	egfp_replicate_2
18.03	157	egfp_replicate_2
18.04	145	egfp_replicate_2
18.06	182	egfp_replicate_2
18.07	84	egfp_replicate_2
18.08	121	egfp_replicate_2
18.11	128	egfp_replicate_2
18.12	148	egfp_replicate_2
18.13	98	egfp_replicate_2
19.01	157	egfp_replicate_2
19.02	110	egfp_replicate_2
19.03	143	egfp_replicate_2
19.06	120	egfp_replicate_2
19.08	164	egfp_replicate_2
19.11	160	egfp_replicate_2
19.12	143	egfp_replicate_2
19.13	59	egfp_replicate_2
20.01	140	egfp_replicate_2
20.03	201	egfp_replicate_2
20.04	163	egfp_replicate_2
20.06	107	egfp_replicate_2
20.11	118	egfp_replicate_2
20.13	153	egfp_replicate_2
21.01	96	egfp_replicate_2
21.02	124	egfp_replicate_2
21.03	85	egfp_replicate_2
21.04	138	egfp_replicate_2
21.06	134	egfp_replicate_2
21.07	136	egfp_replicate_2
21.08	101	egfp_replicate_2
21.11	136	egfp_replicate_2
21.12	120	egfp_replicate_2
22.01	88	egfp_replicate_2
22.02	130	egfp_replicate_2
22.03	192	egfp_replicate_2
22.06	163	egfp_replicate_2
22.11	128	egfp_replicate_2
22.12	134	egfp_replicate_2
22.13	123	egfp_replicate_2
23.02	102	egfp_replicate_2
23.03	137	egfp_replicate_2
23.06	181	egfp_replicate_2
23.07	141	egfp_replicate_2
23.08	123	egfp_replicate_2
23.11	127	egfp_replicate_2
24.01	118	egfp_replicate_2
24.03	96	egfp_replicate_2
24.06	152	egfp_replicate_2
24.07	183	egfp_replicate_2
24.13	184	egfp_replicate_2
25.01	140	egfp_replicate_2
25.03	117	egfp_replicate_2
25.06	124	egfp_replicate_2
25.07	182	egfp_replicate_2
25.12	115	egfp_replicate_2
26.01	113	egfp_replicate_2
26.06	121	egfp_replicate_2
26.12	111	egfp_replicate_2
26.13	114	egfp_replicate_2
27.01	138	egfp_replicate_2
27.06	132	egfp_replicate_2
27.12	116	egfp_replicate_2
28.01	87	egfp_replicate_2
28.06	148	egfp_replicate_2
29.01	114	egfp_replicate_2
29.06	176	egfp_replicate_2
29.12	119	egfp_replicate_2
30.06	159	egfp_replicate_2
31.06	131	egfp_replicate_2
33.06	101	egfp_replicate_2
34.06	78	egfp_replicate_2
1.05	1	wt
1.07	2	wt
1.08	3	wt
1.14	0	wt
2.01	1	wt
2.02	4	wt
2.04	1	wt
2.05	1	wt
2.07	4	wt
2.1	0	wt
2.11	0	wt
3.01	2	wt
3.02	3	wt
3.03	3	wt
3.04	0	wt
3.08	1	wt
3.09	1	wt
3.1	2	wt
3.11	0	wt
3.13	4	wt
3.14	0	wt
4.03	3	wt
4.08	0	wt
4.09	0	wt
4.1	1	wt
4.11	0	wt
4.12	6	wt
4.13	1	wt
5.02	1	wt
5.06	1	wt
5.07	0	wt
5.08	2	wt
5.1	0	wt
5.11	0	wt
5.12	1	wt
5.13	2	wt
5.14	0	wt
6.03	0	wt
6.06	0	wt
6.07	0	wt
6.08	5	wt
6.09	0	wt
6.1	1	wt
6.12	0	wt
6.13	2	wt
6.14	1	wt
7.02	0	wt
7.07	0	wt
7.08	2	wt
7.1	0	wt
7.13	2	wt
7.14	0	wt
8.07	3	wt
8.1	0	wt
8.13	0	wt
8.14	0	wt
9.08	1	wt
9.13	0	wt
10.07	1	wt
10.13	1	wt
10.14	0	wt
11.07	1	wt
11.08	0	wt
11.13	0	wt
11.14	0	wt
12.14	0	wt
13.13	0	wt
13.14	0	wt
14.13	1	wt
14.14	0	wt
15.13	0	wt
16.13	1	wt
17.14	0	wt
1.04	4	tdtomato
1.12	0	tdtomato
1.13	4	tdtomato
2.04	2	tdtomato
2.11	8	tdtomato
3.01	5	tdtomato
3.03	2	tdtomato
3.04	4	tdtomato
3.06	2	tdtomato
3.07	1	tdtomato
3.09	1	tdtomato
3.11	7	tdtomato
3.12	2	tdtomato
3.13	3	tdtomato
3.14	3	tdtomato
4.01	3	tdtomato
4.02	0	tdtomato
4.04	1	tdtomato
4.06	0	tdtomato
4.07	12	tdtomato
4.09	1	tdtomato
4.12	1	tdtomato
4.13	4	tdtomato
5.01	3	tdtomato
5.02	6	tdtomato
5.03	3	tdtomato
5.04	5	tdtomato
5.05	5	tdtomato
5.06	0	tdtomato
5.07	2	tdtomato
5.08	1	tdtomato
5.09	0	tdtomato
5.1	4	tdtomato
5.11	4	tdtomato
5.12	5	tdtomato
5.13	6	tdtomato
5.14	8	tdtomato
6.01	3	tdtomato
6.02	9	tdtomato
6.03	1	tdtomato
6.05	2	tdtomato
6.06	2	tdtomato
6.07	2	tdtomato
6.08	2	tdtomato
6.09	1	tdtomato
6.11	2	tdtomato
6.12	3	tdtomato
6.13	1	tdtomato
6.14	3	tdtomato
6.15	1	tdtomato
7.01	4	tdtomato
7.02	1	tdtomato
7.03	0	tdtomato
7.04	1	tdtomato
7.05	3	tdtomato
7.06	1	tdtomato
7.07	2	tdtomato
7.08	5	tdtomato
7.09	1	tdtomato
7.1	2	tdtomato
7.11	0	tdtomato
7.12	2	tdtomato
7.13	4	tdtomato
7.14	0	tdtomato
7.15	4	tdtomato
8.01	0	tdtomato
8.02	3	tdtomato
8.05	7	tdtomato
8.07	1	tdtomato
8.08	5	tdtomato
8.09	3	tdtomato
8.11	11	tdtomato
8.12	4	tdtomato
8.13	5	tdtomato
8.14	2	tdtomato
8.15	8	tdtomato
9.01	3	tdtomato
9.02	1	tdtomato
9.03	3	tdtomato
9.04	7	tdtomato
9.05	4	tdtomato
9.07	2	tdtomato
9.08	5	tdtomato
9.09	1	tdtomato
9.1	0	tdtomato
9.11	3	tdtomato
9.15	0	tdtomato
10.01	4	tdtomato
10.02	0	tdtomato
10.03	0	tdtomato
10.04	2	tdtomato
10.07	5	tdtomato
10.08	3	tdtomato
10.09	2	tdtomato
10.11	4	tdtomato
10.12	0	tdtomato
10.14	1	tdtomato
10.15	0	tdtomato
11.01	3	tdtomato
11.02	4	tdtomato
11.03	2	tdtomato
11.04	3	tdtomato
11.05	1	tdtomato
11.07	4	tdtomato
11.08	1	tdtomato
11.09	0	tdtomato
11.1	1	tdtomato
11.11	3	tdtomato
11.12	3	tdtomato
11.13	1	tdtomato
11.14	0	tdtomato
11.15	3	tdtomato
12.03	0	tdtomato
12.04	3	tdtomato
12.05	3	tdtomato
12.08	2	tdtomato
12.09	0	tdtomato
12.1	3	tdtomato
12.11	5	tdtomato
12.12	1	tdtomato
12.13	1	tdtomato
12.14	0	tdtomato
12.15	0	tdtomato
13.02	3	tdtomato
13.03	7	tdtomato
13.04	1	tdtomato
13.05	3	tdtomato
13.07	0	tdtomato
13.08	5	tdtomato
13.09	0	tdtomato
13.11	2	tdtomato
13.12	1	tdtomato
13.13	2	tdtomato
13.14	4	tdtomato
14.01	2	tdtomato
14.02	1	tdtomato
14.03	3	tdtomato
14.04	0	tdtomato
14.05	0	tdtomato
14.07	1	tdtomato
14.08	0	tdtomato
14.09	0	tdtomato
14.1	7	tdtomato
14.11	1	tdtomato
14.12	3	tdtomato
14.13	1	tdtomato
15.01	1	tdtomato
15.02	2	tdtomato
15.03	4	tdtomato
15.04	1	tdtomato
15.05	0	tdtomato
15.07	0	tdtomato
15.08	0	tdtomato
15.09	0	tdtomato
15.1	2	tdtomato
15.11	4	tdtomato
15.13	1	tdtomato
15.14	3	tdtomato
15.15	1	tdtomato
16.01	0	tdtomato
16.02	4	tdtomato
16.03	1	tdtomato
16.04	0	tdtomato
16.05	1	tdtomato
16.07	0	tdtomato
16.08	0	tdtomato
16.09	1	tdtomato
16.1	0	tdtomato
16.11	2	tdtomato
16.12	1	tdtomato
16.13	0	tdtomato
16.14	0	tdtomato
16.15	0	tdtomato
17.03	1	tdtomato
17.07	0	tdtomato
17.08	1	tdtomato
17.09	0	tdtomato
17.1	0	tdtomato
17.11	7	tdtomato
17.12	0	tdtomato
17.13	1	tdtomato
17.15	2	tdtomato
18.01	0	tdtomato
18.02	2	tdtomato
18.03	0	tdtomato
18.04	1	tdtomato
18.05	0	tdtomato
18.08	4	tdtomato
18.09	0	tdtomato
18.1	0	tdtomato
18.11	2	tdtomato
18.12	1	tdtomato
18.14	1	tdtomato
18.15	3	tdtomato
19.01	1	tdtomato
19.08	1	tdtomato
19.1	1	tdtomato
19.11	1	tdtomato
19.12	1	tdtomato
19.13	4	tdtomato
19.15	0	tdtomato
20.03	2	tdtomato
20.04	0	tdtomato
20.05	2	tdtomato
20.07	0	tdtomato
20.09	0	tdtomato
20.1	0	tdtomato
20.11	0	tdtomato
20.13	0	tdtomato
21.02	0	tdtomato
21.03	4	tdtomato
21.05	3	tdtomato
21.07	0	tdtomato
21.08	0	tdtomato
21.09	1	tdtomato
21.1	3	tdtomato
21.11	0	tdtomato
21.12	1	tdtomato
21.15	0	tdtomato
22.02	0	tdtomato
22.03	0	tdtomato
22.05	5	tdtomato
22.08	4	tdtomato
22.09	0	tdtomato
22.1	1	tdtomato
22.11	3	tdtomato
22.12	0	tdtomato
22.15	0	tdtomato
23.02	0	tdtomato
23.05	3	tdtomato
23.08	3	tdtomato
23.1	0	tdtomato
23.11	0	tdtomato
23.13	0	tdtomato
23.15	0	tdtomato
24.02	1	tdtomato
24.03	0	tdtomato
24.05	3	tdtomato
24.08	0	tdtomato
24.1	1	tdtomato
24.15	0	tdtomato
25.02	0	tdtomato
25.03	1	tdtomato
25.05	3	tdtomato
25.08	0	tdtomato
25.1	0	tdtomato
25.11	4	tdtomato
25.15	0	tdtomato
26.02	1	tdtomato
26.03	0	tdtomato
26.05	0	tdtomato
26.1	0	tdtomato
26.11	4	tdtomato
26.15	1	tdtomato
27.03	0	tdtomato
27.05	0	tdtomato
27.08	1	tdtomato
27.1	0	tdtomato
27.11	0	tdtomato
28.02	0	tdtomato
28.05	1	tdtomato
28.1	1	tdtomato
28.11	1	tdtomato
28.15	0	tdtomato
29.02	0	tdtomato
29.03	2	tdtomato
29.05	1	tdtomato
29.1	0	tdtomato
30.02	0	tdtomato
30.03	0	tdtomato
30.05	0	tdtomato
30.1	0	tdtomato
31.02	0	tdtomato
31.03	1	tdtomato
31.05	1	tdtomato
32.02	0	tdtomato
32.03	0	tdtomato
32.05	1	tdtomato
32.1	0	tdtomato
33.1	0	tdtomato
34.03	0	tdtomato
34.05	0	tdtomato
35.03	0	tdtomato
35.05	1	tdtomato
36.03	0	tdtomato
36.05	1	tdtomato
36.1	0	tdtomato
37.03	0	tdtomato
37.05	0	tdtomato
38.03	0	tdtomato
39.03	0	tdtomato
45.03	0	tdtomato

## Sheet: Supp Figure 8h
cellID	nSpots	area	cell_line
2.02	131	58565	egfp_replicate_1
3.02	119	48786	egfp_replicate_1
3.03	144	56244	egfp_replicate_1
3.06	99	36661	egfp_replicate_1
3.08	214	78775	egfp_replicate_1
3.1	111	44487	egfp_replicate_1
3.12	99	32905	egfp_replicate_1
4.01	127	53650	egfp_replicate_1
4.02	147	53003	egfp_replicate_1
4.03	98	31920	egfp_replicate_1
4.05	180	68652	egfp_replicate_1
4.06	84	27964	egfp_replicate_1
4.07	77	37088	egfp_replicate_1
4.08	136	48006	egfp_replicate_1
4.09	132	47056	egfp_replicate_1
4.1	75	34104	egfp_replicate_1
4.11	109	40953	egfp_replicate_1
4.12	133	55230	egfp_replicate_1
4.13	93	41041	egfp_replicate_1
4.14	147	47950	egfp_replicate_1
4.15	82	34917	egfp_replicate_1
5.01	82	31724	egfp_replicate_1
5.02	130	45347	egfp_replicate_1
5.03	109	46140	egfp_replicate_1
5.04	132	52369	egfp_replicate_1
5.05	146	54611	egfp_replicate_1
5.06	125	47040	egfp_replicate_1
5.08	88	44195	egfp_replicate_1
5.09	78	27088	egfp_replicate_1
5.1	105	44072	egfp_replicate_1
5.11	99	43596	egfp_replicate_1
5.12	109	42588	egfp_replicate_1
5.13	127	41304	egfp_replicate_1
5.14	126	43349	egfp_replicate_1
5.15	135	53752	egfp_replicate_1
6.01	119	47119	egfp_replicate_1
6.02	88	30297	egfp_replicate_1
6.03	139	46321	egfp_replicate_1
6.04	73	31222	egfp_replicate_1
6.06	82	31792	egfp_replicate_1
6.07	133	48236	egfp_replicate_1
6.1	155	55878	egfp_replicate_1
6.11	101	49331	egfp_replicate_1
6.13	152	57431	egfp_replicate_1
7.03	67	21755	egfp_replicate_1
7.04	146	47865	egfp_replicate_1
7.05	113	38034	egfp_replicate_1
7.08	100	37505	egfp_replicate_1
7.09	109	44451	egfp_replicate_1
7.1	59	12380	egfp_replicate_1
7.12	137	53700	egfp_replicate_1
7.13	131	52099	egfp_replicate_1
7.14	105	41681	egfp_replicate_1
7.15	233	91745	egfp_replicate_1
8.01	78	31367	egfp_replicate_1
8.02	104	34818	egfp_replicate_1
8.03	107	45225	egfp_replicate_1
8.04	142	42392	egfp_replicate_1
8.05	128	30420	egfp_replicate_1
8.06	110	43283	egfp_replicate_1
8.07	125	44109	egfp_replicate_1
8.08	125	45804	egfp_replicate_1
8.1	123	49571	egfp_replicate_1
8.11	99	45063	egfp_replicate_1
8.12	223	84029	egfp_replicate_1
9.01	81	31773	egfp_replicate_1
9.02	121	41787	egfp_replicate_1
9.03	123	55680	egfp_replicate_1
9.04	107	47944	egfp_replicate_1
9.06	96	45057	egfp_replicate_1
9.07	110	34082	egfp_replicate_1
9.08	93	40663	egfp_replicate_1
9.09	67	23245	egfp_replicate_1
9.1	138	49561	egfp_replicate_1
9.11	143	53783	egfp_replicate_1
9.12	96	32115	egfp_replicate_1
9.14	167	63126	egfp_replicate_1
9.15	181	65292	egfp_replicate_1
10.01	111	41267	egfp_replicate_1
10.03	132	50629	egfp_replicate_1
10.04	140	41879	egfp_replicate_1
10.05	119	50411	egfp_replicate_1
10.06	138	63782	egfp_replicate_1
10.07	123	42729	egfp_replicate_1
10.09	107	35076	egfp_replicate_1
10.1	135	42912	egfp_replicate_1
10.11	88	40770	egfp_replicate_1
10.12	137	53014	egfp_replicate_1
10.13	130	40593	egfp_replicate_1
10.14	79	29048	egfp_replicate_1
10.15	158	57946	egfp_replicate_1
11.01	130	50546	egfp_replicate_1
11.02	143	55713	egfp_replicate_1
11.03	86	26049	egfp_replicate_1
11.05	195	66387	egfp_replicate_1
11.06	30	8004	egfp_replicate_1
11.07	136	60344	egfp_replicate_1
11.08	151	44065	egfp_replicate_1
11.09	77	19242	egfp_replicate_1
11.1	107	39730	egfp_replicate_1
11.12	114	45136	egfp_replicate_1
11.13	94	39680	egfp_replicate_1
11.14	170	62030	egfp_replicate_1
11.15	109	38504	egfp_replicate_1
12.02	165	55116	egfp_replicate_1
12.04	76	32524	egfp_replicate_1
12.05	89	32086	egfp_replicate_1
12.06	142	64571	egfp_replicate_1
12.07	109	39933	egfp_replicate_1
12.08	115	45274	egfp_replicate_1
12.09	72	23968	egfp_replicate_1
12.1	100	36866	egfp_replicate_1
12.11	81	32687	egfp_replicate_1
12.13	92	36103	egfp_replicate_1
12.15	80	21629	egfp_replicate_1
13.01	127	51317	egfp_replicate_1
13.02	117	41539	egfp_replicate_1
13.03	72	23479	egfp_replicate_1
13.04	70	25321	egfp_replicate_1
13.05	114	48997	egfp_replicate_1
13.06	141	53669	egfp_replicate_1
13.07	131	48320	egfp_replicate_1
13.08	92	24313	egfp_replicate_1
13.09	112	40203	egfp_replicate_1
13.1	119	49638	egfp_replicate_1
13.11	151	57822	egfp_replicate_1
13.12	111	39878	egfp_replicate_1
13.13	107	39978	egfp_replicate_1
13.15	116	39625	egfp_replicate_1
14.01	124	42641	egfp_replicate_1
14.02	137	46292	egfp_replicate_1
14.03	136	45444	egfp_replicate_1
14.04	158	59434	egfp_replicate_1
14.05	138	48426	egfp_replicate_1
14.06	102	42228	egfp_replicate_1
14.07	116	46579	egfp_replicate_1
14.08	88	22223	egfp_replicate_1
14.09	149	38645	egfp_replicate_1
14.11	109	43149	egfp_replicate_1
14.12	96	20399	egfp_replicate_1
14.14	78	19718	egfp_replicate_1
14.15	95	38974	egfp_replicate_1
15.01	135	51611	egfp_replicate_1
15.02	120	47817	egfp_replicate_1
15.03	94	31800	egfp_replicate_1
15.04	86	30206	egfp_replicate_1
15.06	108	36251	egfp_replicate_1
15.07	101	42727	egfp_replicate_1
15.08	138	50634	egfp_replicate_1
15.09	165	43897	egfp_replicate_1
15.11	103	47807	egfp_replicate_1
15.12	211	68845	egfp_replicate_1
15.13	122	35539	egfp_replicate_1
15.14	97	33605	egfp_replicate_1
15.15	137	48928	egfp_replicate_1
16.01	91	34378	egfp_replicate_1
16.02	89	31680	egfp_replicate_1
16.03	147	58401	egfp_replicate_1
16.04	125	47604	egfp_replicate_1
16.06	150	59734	egfp_replicate_1
16.07	121	45878	egfp_replicate_1
16.09	120	45649	egfp_replicate_1
16.12	96	27903	egfp_replicate_1
16.13	47	16777	egfp_replicate_1
16.14	168	59694	egfp_replicate_1
17.01	91	49772	egfp_replicate_1
17.02	129	50261	egfp_replicate_1
17.03	129	56160	egfp_replicate_1
17.04	93	39269	egfp_replicate_1
17.06	154	50929	egfp_replicate_1
17.08	114	41334	egfp_replicate_1
17.09	137	48906	egfp_replicate_1
17.13	125	45026	egfp_replicate_1
17.14	62	49332	egfp_replicate_1
17.15	122	49852	egfp_replicate_1
18.01	107	37465	egfp_replicate_1
18.02	83	27281	egfp_replicate_1
18.03	155	49883	egfp_replicate_1
18.04	131	51722	egfp_replicate_1
18.06	123	47998	egfp_replicate_1
18.07	74	21048	egfp_replicate_1
18.08	118	38675	egfp_replicate_1
18.09	77	31461	egfp_replicate_1
18.12	165	64741	egfp_replicate_1
18.15	127	37966	egfp_replicate_1
19.01	156	50738	egfp_replicate_1
19.02	85	27966	egfp_replicate_1
19.03	119	45728	egfp_replicate_1
19.06	176	44736	egfp_replicate_1
19.09	151	50376	egfp_replicate_1
19.11	109	46817	egfp_replicate_1
19.12	104	42598	egfp_replicate_1
19.13	113	50998	egfp_replicate_1
19.14	108	37732	egfp_replicate_1
19.15	117	45616	egfp_replicate_1
20.01	119	45290	egfp_replicate_1
20.02	128	51260	egfp_replicate_1
20.04	72	32854	egfp_replicate_1
20.07	100	39499	egfp_replicate_1
20.08	133	55144	egfp_replicate_1
20.09	92	38241	egfp_replicate_1
20.12	106	38568	egfp_replicate_1
20.13	100	33527	egfp_replicate_1
20.14	108	47400	egfp_replicate_1
20.15	139	57139	egfp_replicate_1
21.01	103	33686	egfp_replicate_1
21.02	117	65674	egfp_replicate_1
21.03	139	51901	egfp_replicate_1
21.04	76	34175	egfp_replicate_1
21.06	81	21327	egfp_replicate_1
21.07	119	52769	egfp_replicate_1
21.09	124	47334	egfp_replicate_1
21.11	94	36955	egfp_replicate_1
21.12	130	44632	egfp_replicate_1
21.15	90	36478	egfp_replicate_1
22.02	132	48674	egfp_replicate_1
22.04	148	60470	egfp_replicate_1
22.06	144	46594	egfp_replicate_1
22.07	110	29385	egfp_replicate_1
22.08	129	47799	egfp_replicate_1
22.11	115	50795	egfp_replicate_1
22.12	118	59076	egfp_replicate_1
22.13	179	53126	egfp_replicate_1
22.14	116	35416	egfp_replicate_1
22.15	107	38033	egfp_replicate_1
23.01	119	53374	egfp_replicate_1
23.02	207	48539	egfp_replicate_1
23.03	119	44398	egfp_replicate_1
23.04	146	58062	egfp_replicate_1
23.08	95	26441	egfp_replicate_1
23.09	142	54027	egfp_replicate_1
23.12	122	41146	egfp_replicate_1
23.13	124	46789	egfp_replicate_1
23.15	147	44705	egfp_replicate_1
24.01	128	50868	egfp_replicate_1
24.02	122	47601	egfp_replicate_1
24.03	126	57681	egfp_replicate_1
24.07	116	39882	egfp_replicate_1
24.09	102	44730	egfp_replicate_1
24.11	119	50235	egfp_replicate_1
24.13	85	33454	egfp_replicate_1
24.14	135	51370	egfp_replicate_1
25.01	90	38130	egfp_replicate_1
25.03	91	30911	egfp_replicate_1
25.07	125	28133	egfp_replicate_1
25.11	105	39391	egfp_replicate_1
25.12	131	47238	egfp_replicate_1
25.14	128	22166	egfp_replicate_1
25.15	154	65907	egfp_replicate_1
26.02	96	33150	egfp_replicate_1
26.03	126	50244	egfp_replicate_1
26.07	68	20067	egfp_replicate_1
26.09	139	59456	egfp_replicate_1
26.11	93	36584	egfp_replicate_1
26.13	94	30860	egfp_replicate_1
27.01	111	51416	egfp_replicate_1
27.02	99	38805	egfp_replicate_1
27.03	92	29690	egfp_replicate_1
27.07	170	63582	egfp_replicate_1
27.09	154	59697	egfp_replicate_1
27.13	118	46293	egfp_replicate_1
27.14	123	35511	egfp_replicate_1
28.01	128	48292	egfp_replicate_1
28.02	181	58928	egfp_replicate_1
28.09	138	43199	egfp_replicate_1
28.13	109	35979	egfp_replicate_1
28.14	137	53386	egfp_replicate_1
29.03	149	54868	egfp_replicate_1
29.07	136	53748	egfp_replicate_1
29.09	117	45486	egfp_replicate_1
29.13	107	40420	egfp_replicate_1
30.02	147	59306	egfp_replicate_1
30.03	126	41267	egfp_replicate_1
30.07	89	22887	egfp_replicate_1
30.13	137	48002	egfp_replicate_1
31.01	158	61988	egfp_replicate_1
31.03	106	44605	egfp_replicate_1
31.07	77	19816	egfp_replicate_1
31.09	123	40429	egfp_replicate_1
31.13	135	47315	egfp_replicate_1
31.14	105	35146	egfp_replicate_1
32.03	136	51461	egfp_replicate_1
32.07	117	41662	egfp_replicate_1
32.09	95	30907	egfp_replicate_1
32.13	112	38225	egfp_replicate_1
33.02	80	30370	egfp_replicate_1
33.07	132	50513	egfp_replicate_1
33.09	154	59204	egfp_replicate_1
33.13	121	43361	egfp_replicate_1
34.01	106	45822	egfp_replicate_1
34.03	74	37472	egfp_replicate_1
35.03	98	33309	egfp_replicate_1
35.09	66	15334	egfp_replicate_1
36.09	127	50481	egfp_replicate_1
1.07	144	60000	egfp_replicate_2
1.09	133	48302	egfp_replicate_2
2.01	114	47818	egfp_replicate_2
2.07	112	39885	egfp_replicate_2
2.08	132	47218	egfp_replicate_2
2.09	126	53501	egfp_replicate_2
2.13	85	44086	egfp_replicate_2
3.01	140	59070	egfp_replicate_2
3.06	161	61780	egfp_replicate_2
3.08	127	48093	egfp_replicate_2
3.1	140	52917	egfp_replicate_2
3.11	116	43149	egfp_replicate_2
3.13	152	66334	egfp_replicate_2
3.14	146	68553	egfp_replicate_2
4.03	151	58447	egfp_replicate_2
4.04	118	50863	egfp_replicate_2
4.05	110	48358	egfp_replicate_2
4.06	145	45846	egfp_replicate_2
4.07	99	25862	egfp_replicate_2
4.08	100	60442	egfp_replicate_2
4.1	105	38352	egfp_replicate_2
4.11	92	30460	egfp_replicate_2
4.12	162	64724	egfp_replicate_2
4.13	105	56124	egfp_replicate_2
4.14	147	72554	egfp_replicate_2
4.15	109	50878	egfp_replicate_2
5.01	162	85120	egfp_replicate_2
5.02	87	35864	egfp_replicate_2
5.03	130	52685	egfp_replicate_2
5.04	123	59761	egfp_replicate_2
5.05	84	34640	egfp_replicate_2
5.06	107	39311	egfp_replicate_2
5.08	159	68588	egfp_replicate_2
5.09	120	46864	egfp_replicate_2
5.11	99	44339	egfp_replicate_2
5.12	146	57241	egfp_replicate_2
5.13	103	38758	egfp_replicate_2
5.14	84	31229	egfp_replicate_2
6.01	148	48073	egfp_replicate_2
6.02	92	28956	egfp_replicate_2
6.03	176	49710	egfp_replicate_2
6.04	94	66255	egfp_replicate_2
6.06	110	39013	egfp_replicate_2
6.07	145	50087	egfp_replicate_2
6.09	160	60208	egfp_replicate_2
6.12	120	41911	egfp_replicate_2
6.13	136	54846	egfp_replicate_2
6.14	123	58390	egfp_replicate_2
7.01	107	46251	egfp_replicate_2
7.02	112	38436	egfp_replicate_2
7.03	137	35178	egfp_replicate_2
7.04	147	66716	egfp_replicate_2
7.05	106	39385	egfp_replicate_2
7.06	175	62940	egfp_replicate_2
7.07	136	62725	egfp_replicate_2
7.08	126	49149	egfp_replicate_2
7.09	131	45228	egfp_replicate_2
7.1	108	38962	egfp_replicate_2
7.11	121	51099	egfp_replicate_2
7.13	161	63305	egfp_replicate_2
7.14	134	57164	egfp_replicate_2
8.01	101	40784	egfp_replicate_2
8.02	106	43221	egfp_replicate_2
8.03	111	35636	egfp_replicate_2
8.06	136	58312	egfp_replicate_2
8.07	103	48475	egfp_replicate_2
8.08	159	81373	egfp_replicate_2
8.09	125	53663	egfp_replicate_2
8.1	132	58280	egfp_replicate_2
8.11	123	61490	egfp_replicate_2
8.12	127	44381	egfp_replicate_2
8.15	336	52426	egfp_replicate_2
9.01	124	54125	egfp_replicate_2
9.02	146	61153	egfp_replicate_2
9.03	234	51552	egfp_replicate_2
9.05	150	66641	egfp_replicate_2
9.07	170	60132	egfp_replicate_2
9.08	134	42631	egfp_replicate_2
9.09	124	47218	egfp_replicate_2
9.1	140	50943	egfp_replicate_2
9.11	123	51024	egfp_replicate_2
9.13	99	31430	egfp_replicate_2
10.01	92	23692	egfp_replicate_2
10.02	177	63887	egfp_replicate_2
10.03	149	54559	egfp_replicate_2
10.04	126	46083	egfp_replicate_2
10.05	113	53943	egfp_replicate_2
10.06	192	68128	egfp_replicate_2
10.07	169	77873	egfp_replicate_2
10.08	114	46772	egfp_replicate_2
10.09	250	75236	egfp_replicate_2
10.12	135	62618	egfp_replicate_2
10.15	141	39576	egfp_replicate_2
11.01	172	74114	egfp_replicate_2
11.02	162	63291	egfp_replicate_2
11.03	198	48651	egfp_replicate_2
11.05	106	37728	egfp_replicate_2
11.06	135	49986	egfp_replicate_2
11.07	75	21718	egfp_replicate_2
11.08	192	92749	egfp_replicate_2
11.1	162	74379	egfp_replicate_2
11.11	115	50657	egfp_replicate_2
11.12	91	32730	egfp_replicate_2
11.13	112	52370	egfp_replicate_2
11.15	112	36190	egfp_replicate_2
12.01	95	36816	egfp_replicate_2
12.03	95	33453	egfp_replicate_2
12.04	119	49329	egfp_replicate_2
12.06	117	44877	egfp_replicate_2
12.08	123	62866	egfp_replicate_2
12.09	96	34064	egfp_replicate_2
12.1	168	57439	egfp_replicate_2
12.12	112	37521	egfp_replicate_2
12.13	120	39992	egfp_replicate_2
13.01	141	49447	egfp_replicate_2
13.02	141	54881	egfp_replicate_2
13.03	133	40931	egfp_replicate_2
13.06	147	73721	egfp_replicate_2
13.07	198	54953	egfp_replicate_2
13.08	125	46802	egfp_replicate_2
13.1	127	38191	egfp_replicate_2
13.11	94	39064	egfp_replicate_2
13.12	163	67970	egfp_replicate_2
13.13	93	31345	egfp_replicate_2
13.15	89	25134	egfp_replicate_2
14.01	148	60462	egfp_replicate_2
14.02	122	57123	egfp_replicate_2
14.03	133	50122	egfp_replicate_2
14.04	120	44480	egfp_replicate_2
14.06	105	46497	egfp_replicate_2
14.07	110	50912	egfp_replicate_2
14.08	103	41358	egfp_replicate_2
14.1	122	51643	egfp_replicate_2
14.11	109	38696	egfp_replicate_2
14.12	147	67351	egfp_replicate_2
14.15	97	27295	egfp_replicate_2
15.01	100	41262	egfp_replicate_2
15.02	152	61447	egfp_replicate_2
15.03	146	52686	egfp_replicate_2
15.04	121	42966	egfp_replicate_2
15.05	115	47296	egfp_replicate_2
15.06	162	65691	egfp_replicate_2
15.07	106	35114	egfp_replicate_2
15.08	119	50738	egfp_replicate_2
15.11	162	53317	egfp_replicate_2
15.12	146	58234	egfp_replicate_2
15.13	129	46742	egfp_replicate_2
16.01	155	51857	egfp_replicate_2
16.02	161	59075	egfp_replicate_2
16.03	90	33909	egfp_replicate_2
16.04	122	51239	egfp_replicate_2
16.05	116	55163	egfp_replicate_2
16.06	103	52299	egfp_replicate_2
16.07	102	28281	egfp_replicate_2
16.08	93	51333	egfp_replicate_2
16.11	117	44272	egfp_replicate_2
16.12	94	40763	egfp_replicate_2
16.13	177	53844	egfp_replicate_2
17.01	179	62571	egfp_replicate_2
17.02	144	46538	egfp_replicate_2
17.03	151	44338	egfp_replicate_2
17.04	117	39660	egfp_replicate_2
17.05	159	61770	egfp_replicate_2
17.06	130	48223	egfp_replicate_2
17.07	160	61468	egfp_replicate_2
17.08	113	60794	egfp_replicate_2
17.11	108	28372	egfp_replicate_2
17.12	103	43490	egfp_replicate_2
17.13	137	63037	egfp_replicate_2
17.15	58	14960	egfp_replicate_2
18.01	114	55049	egfp_replicate_2
18.02	149	59033	egfp_replicate_2
18.03	157	57505	egfp_replicate_2
18.04	145	58879	egfp_replicate_2
18.06	182	58966	egfp_replicate_2
18.07	84	25296	egfp_replicate_2
18.08	121	44293	egfp_replicate_2
18.11	128	52630	egfp_replicate_2
18.12	148	51642	egfp_replicate_2
18.13	98	26869	egfp_replicate_2
19.01	157	55209	egfp_replicate_2
19.02	110	35897	egfp_replicate_2
19.03	143	32752	egfp_replicate_2
19.06	120	22567	egfp_replicate_2
19.08	164	65955	egfp_replicate_2
19.11	160	61590	egfp_replicate_2
19.12	143	61965	egfp_replicate_2
19.13	59	20970	egfp_replicate_2
20.01	140	21655	egfp_replicate_2
20.03	201	50623	egfp_replicate_2
20.04	163	67087	egfp_replicate_2
20.06	107	45008	egfp_replicate_2
20.11	118	46250	egfp_replicate_2
20.13	153	62408	egfp_replicate_2
21.01	96	37218	egfp_replicate_2
21.02	124	43131	egfp_replicate_2
21.03	85	28198	egfp_replicate_2
21.04	138	58126	egfp_replicate_2
21.06	134	61584	egfp_replicate_2
21.07	136	57295	egfp_replicate_2
21.08	101	33599	egfp_replicate_2
21.11	136	67103	egfp_replicate_2
21.12	120	37301	egfp_replicate_2
22.01	88	34277	egfp_replicate_2
22.02	130	52125	egfp_replicate_2
22.03	192	66373	egfp_replicate_2
22.06	163	57098	egfp_replicate_2
22.11	128	36307	egfp_replicate_2
22.12	134	53119	egfp_replicate_2
22.13	123	36387	egfp_replicate_2
23.02	102	34696	egfp_replicate_2
23.03	137	56254	egfp_replicate_2
23.06	181	75368	egfp_replicate_2
23.07	141	47175	egfp_replicate_2
23.08	123	20594	egfp_replicate_2
23.11	127	38750	egfp_replicate_2
24.01	118	50120	egfp_replicate_2
24.03	96	31452	egfp_replicate_2
24.06	152	47904	egfp_replicate_2
24.07	183	60571	egfp_replicate_2
24.13	184	68606	egfp_replicate_2
25.01	140	55246	egfp_replicate_2
25.03	117	40841	egfp_replicate_2
25.06	124	32552	egfp_replicate_2
25.07	182	80090	egfp_replicate_2
25.12	115	53115	egfp_replicate_2
26.01	113	40906	egfp_replicate_2
26.06	121	54554	egfp_replicate_2
26.12	111	41639	egfp_replicate_2
26.13	114	30107	egfp_replicate_2
27.01	138	51283	egfp_replicate_2
27.06	132	40915	egfp_replicate_2
27.12	116	40381	egfp_replicate_2
28.01	87	27918	egfp_replicate_2
28.06	148	54766	egfp_replicate_2
29.01	114	46774	egfp_replicate_2
29.06	176	71523	egfp_replicate_2
29.12	119	42072	egfp_replicate_2
30.06	159	68493	egfp_replicate_2
31.06	131	50766	egfp_replicate_2
33.06	101	31520	egfp_replicate_2
34.06	78	33186	egfp_replicate_2
